# Supplementary material for: Genomic Confirmation of Hybridisation and Recent Inbreeding in a Vector-Isolated Leishmania Population
Source: PubMed Central journal article supplement (PMC3894156; doi:10.1371/journal.pgen.1004092), 2014-01-16

chr1

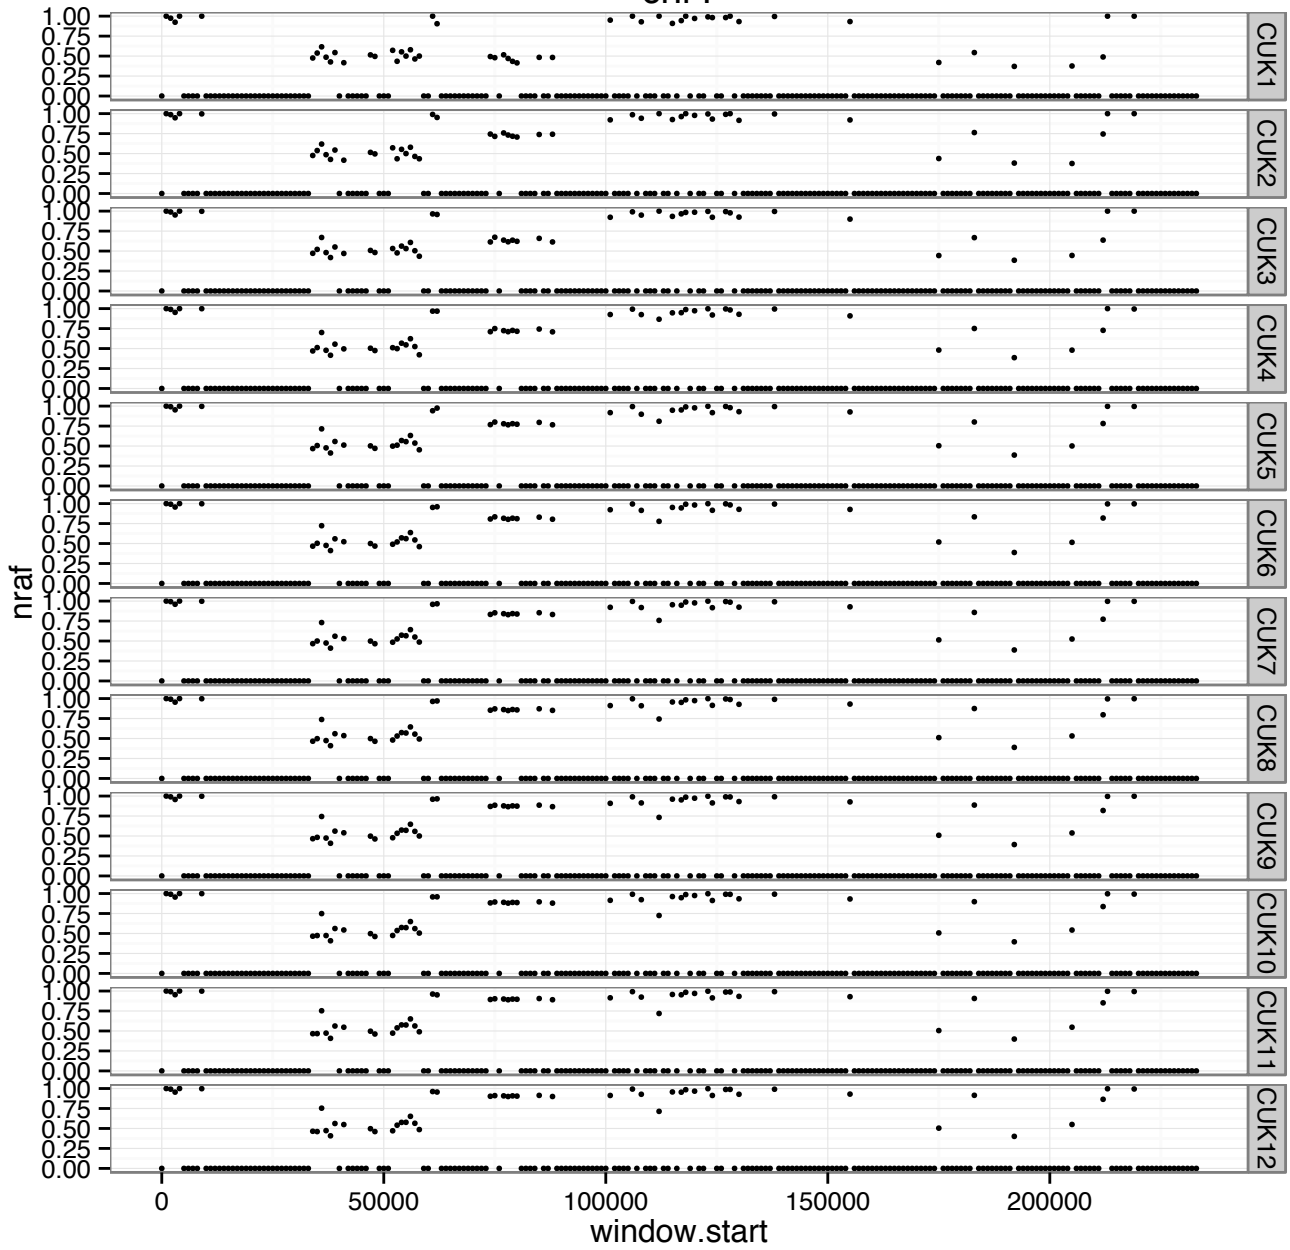

chr2

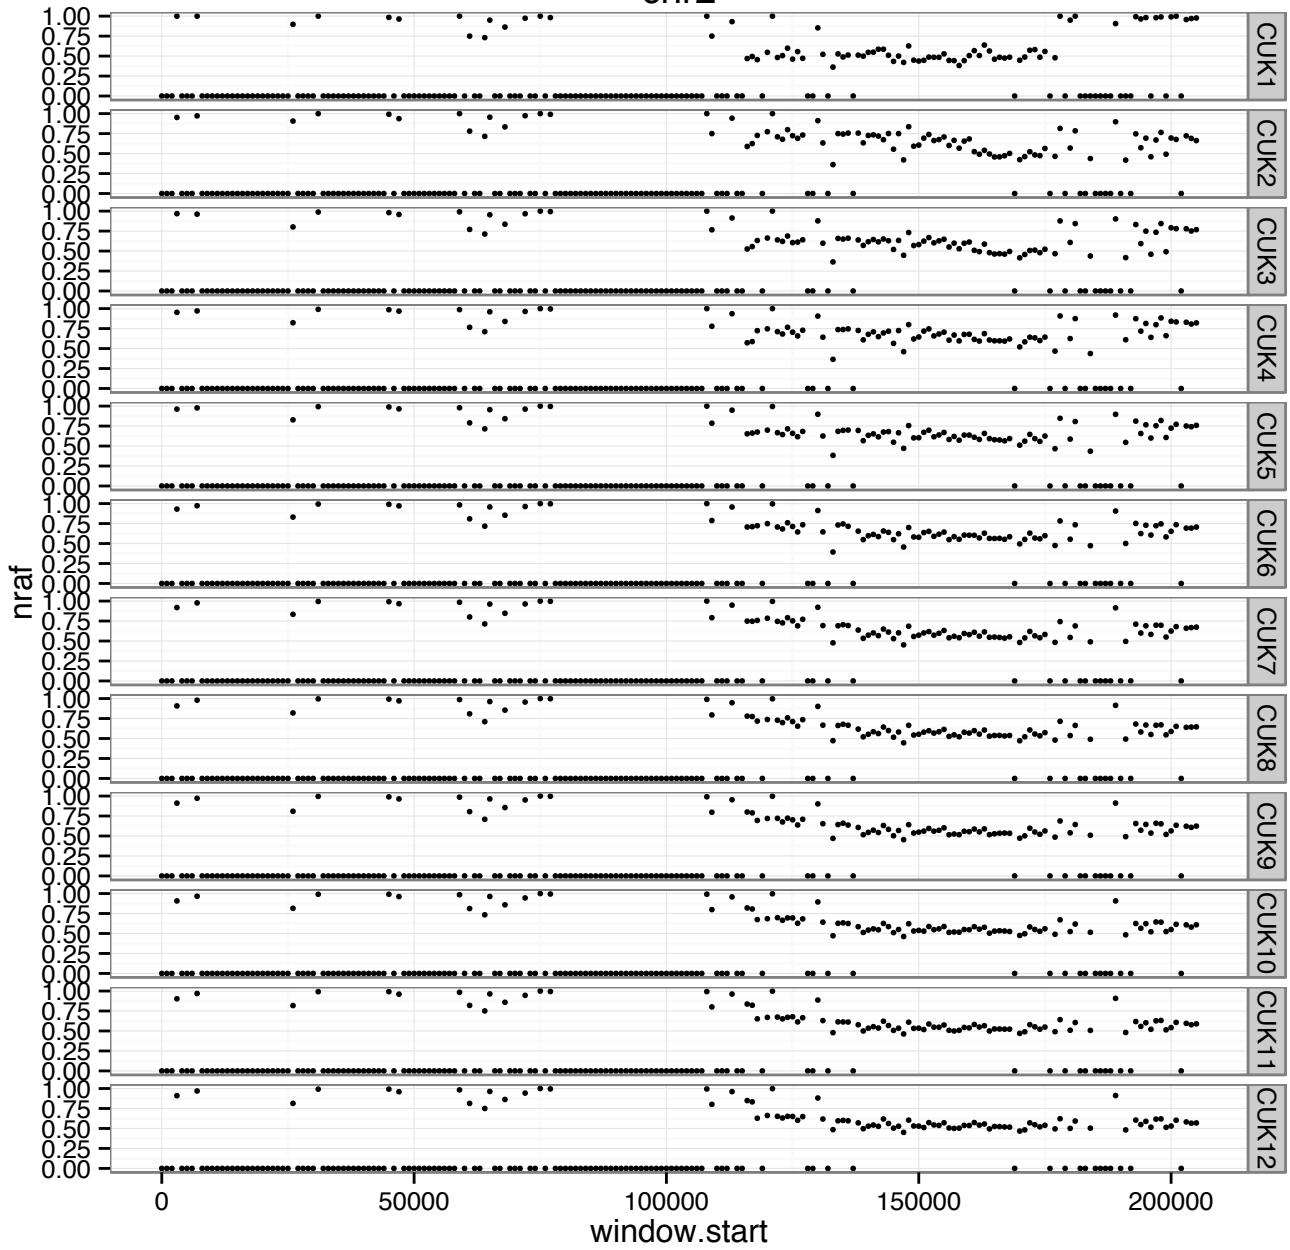

chr3

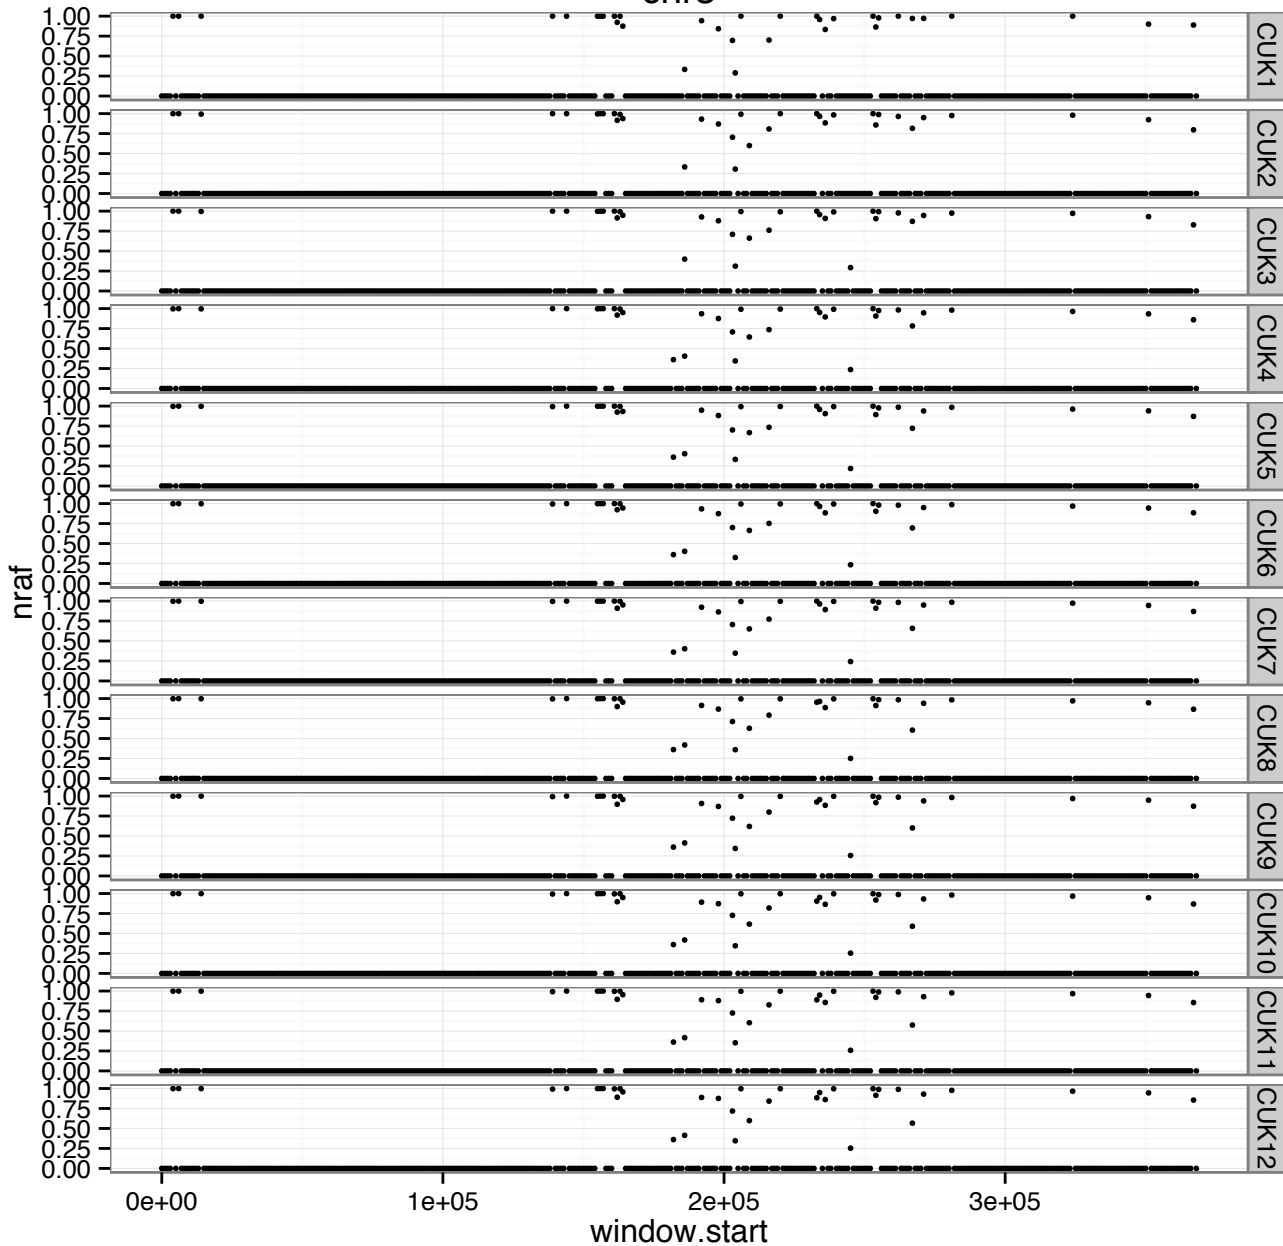

chr4

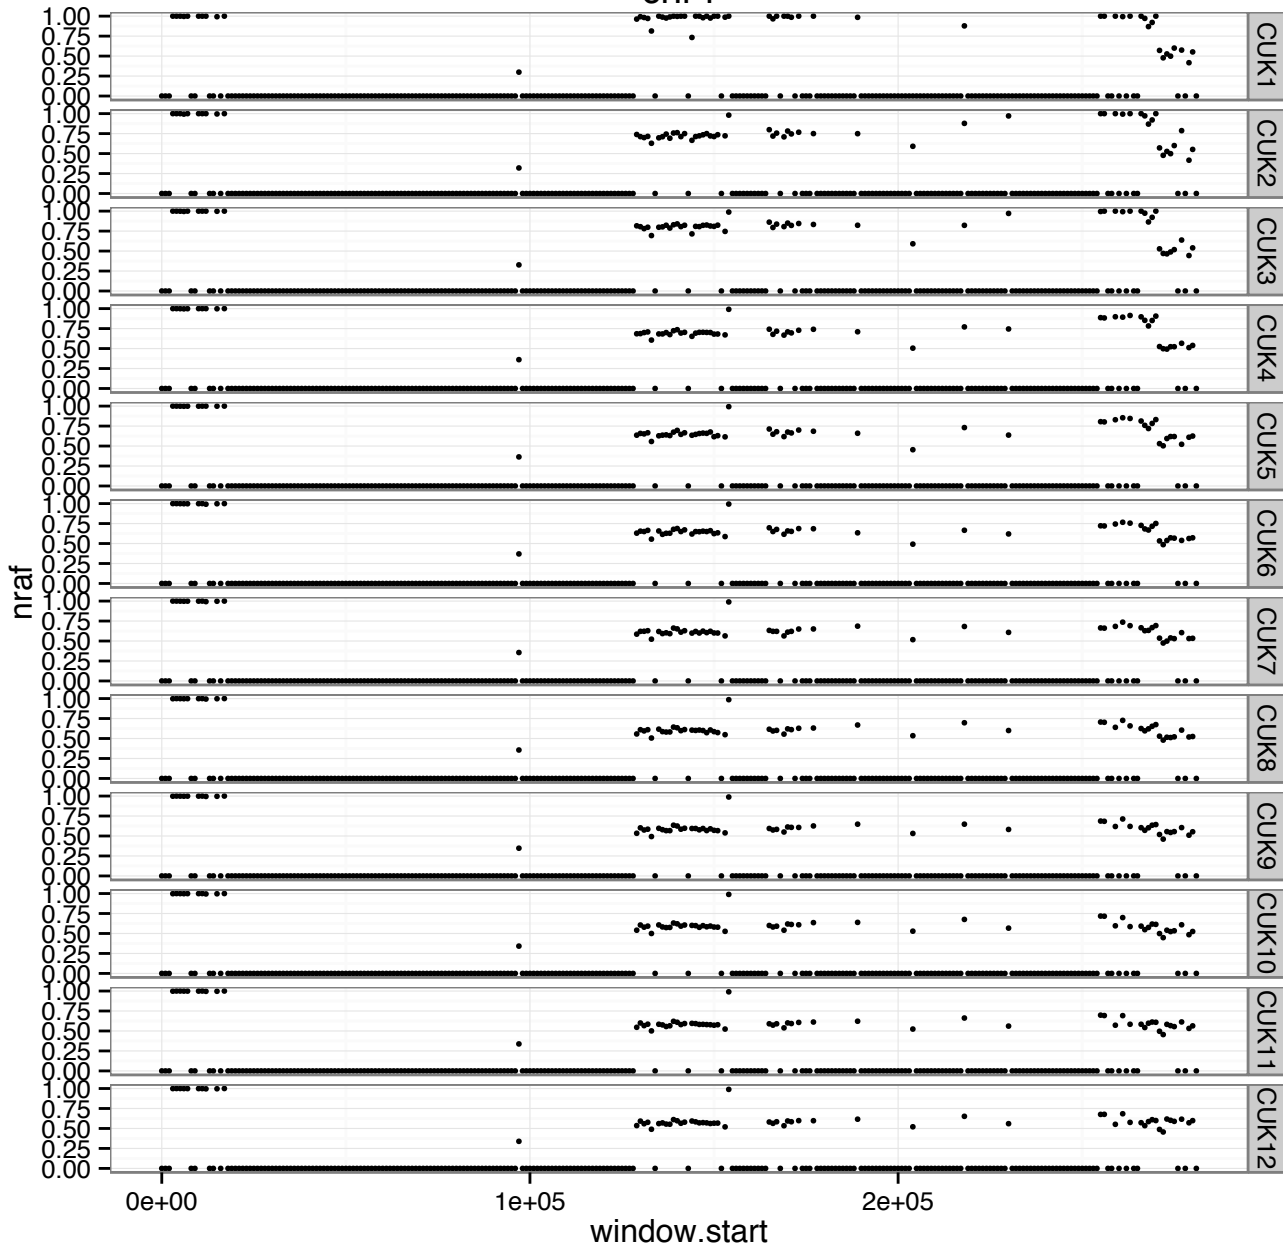

chr5

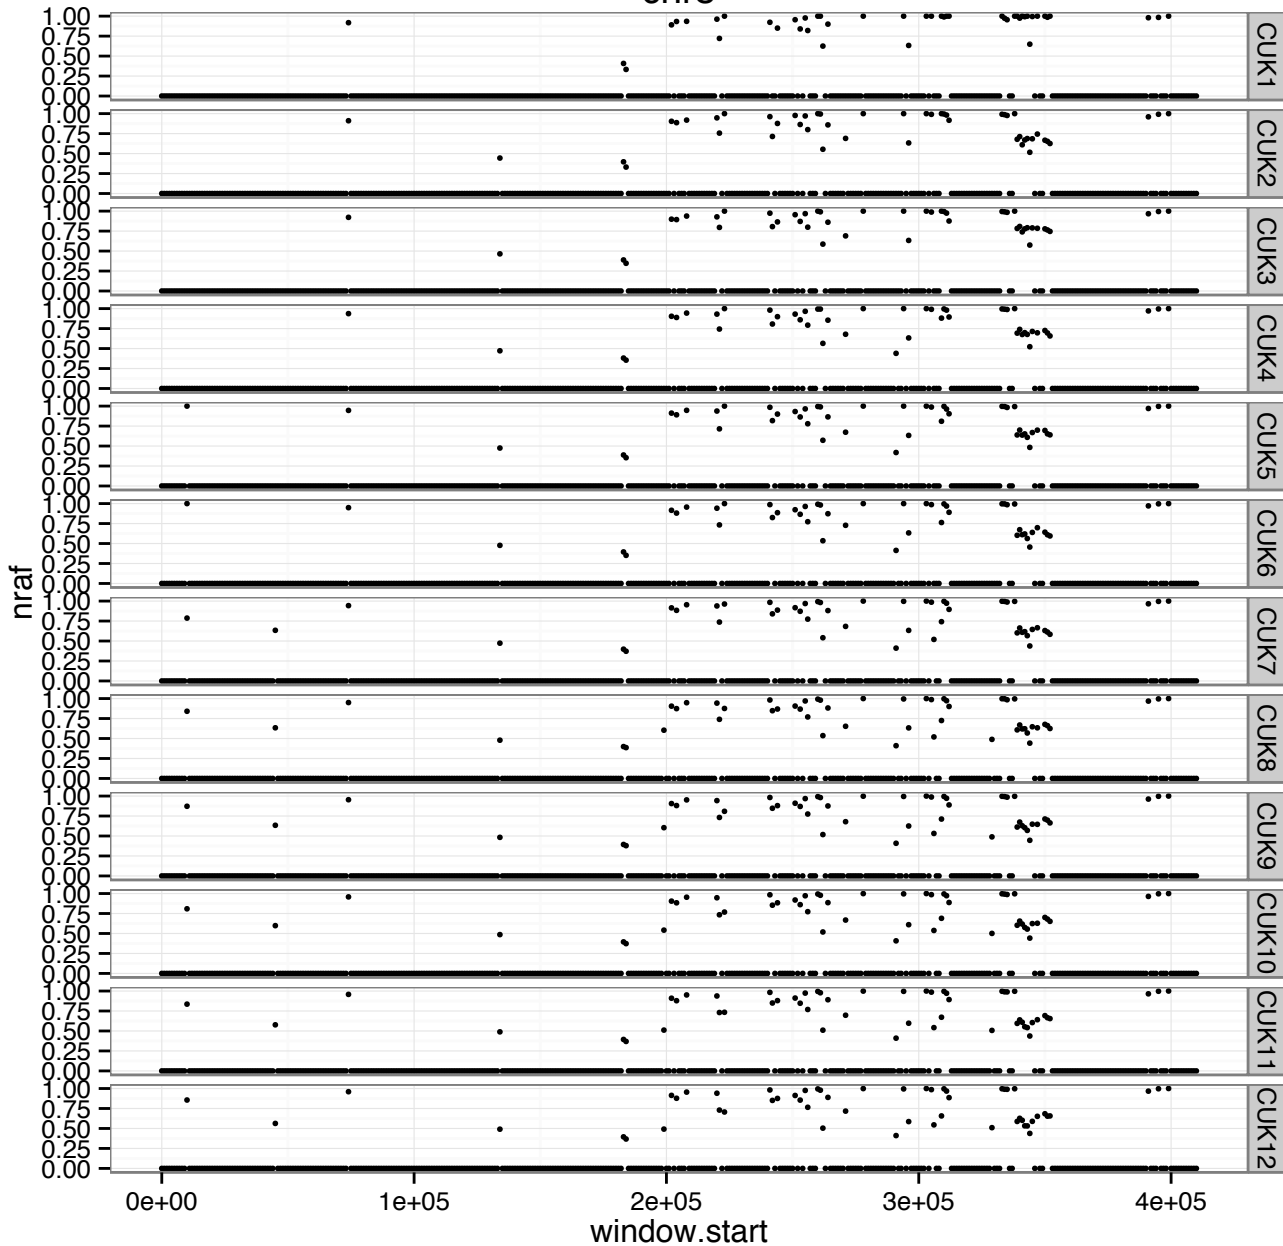

chr6

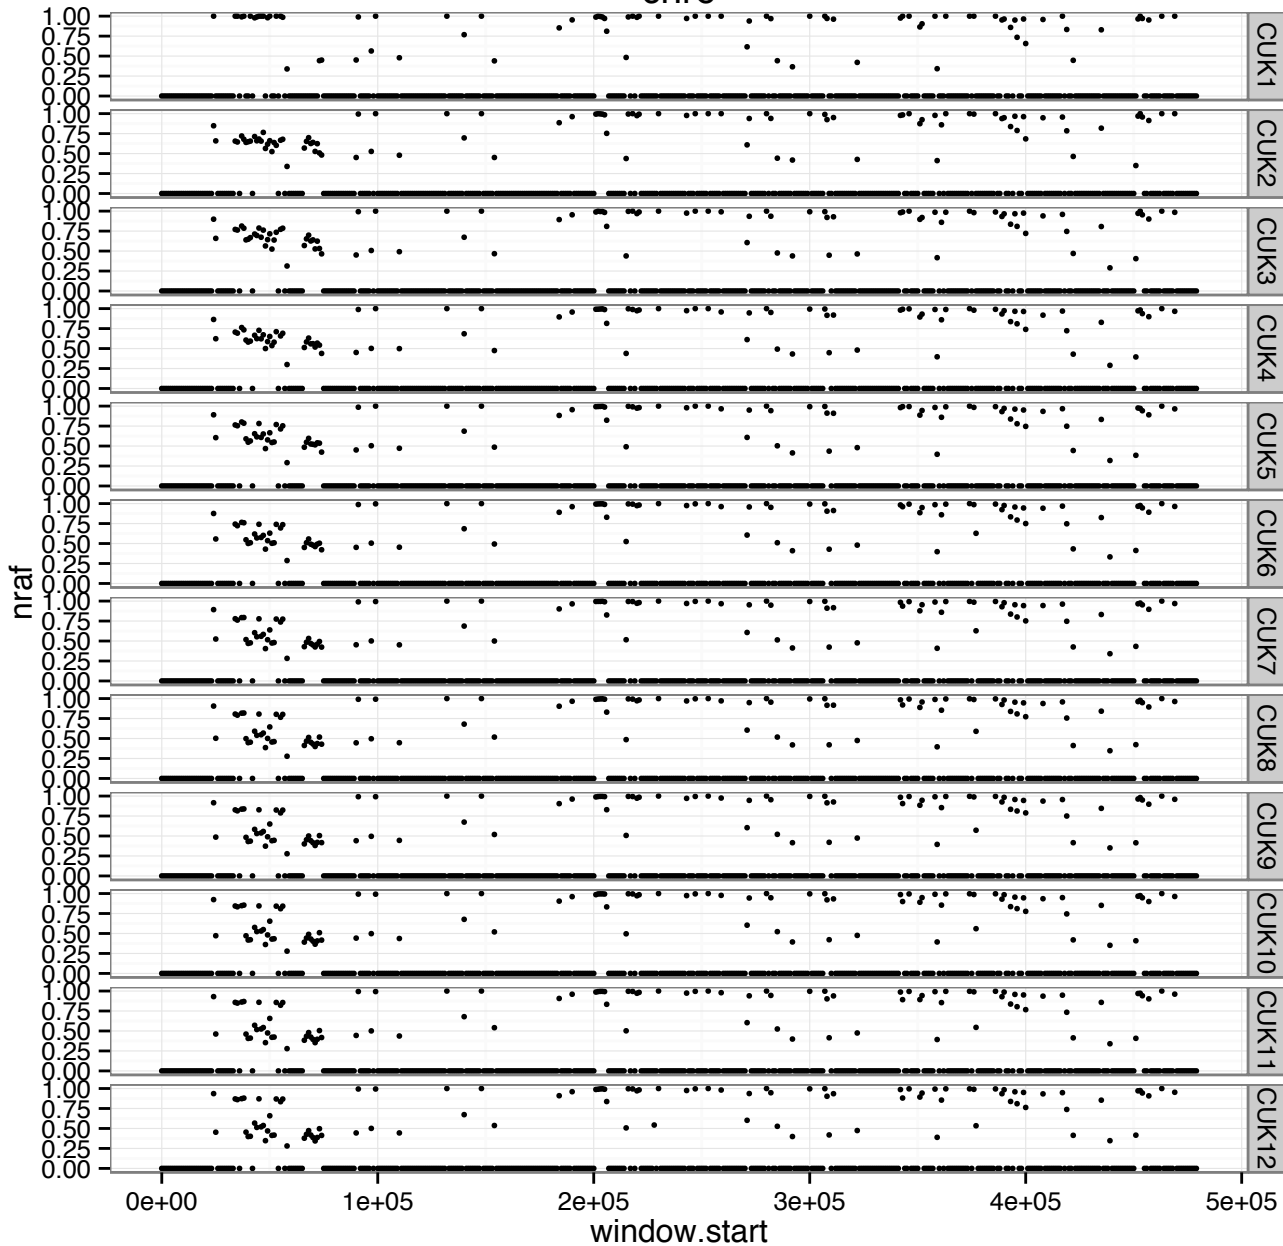

chr7

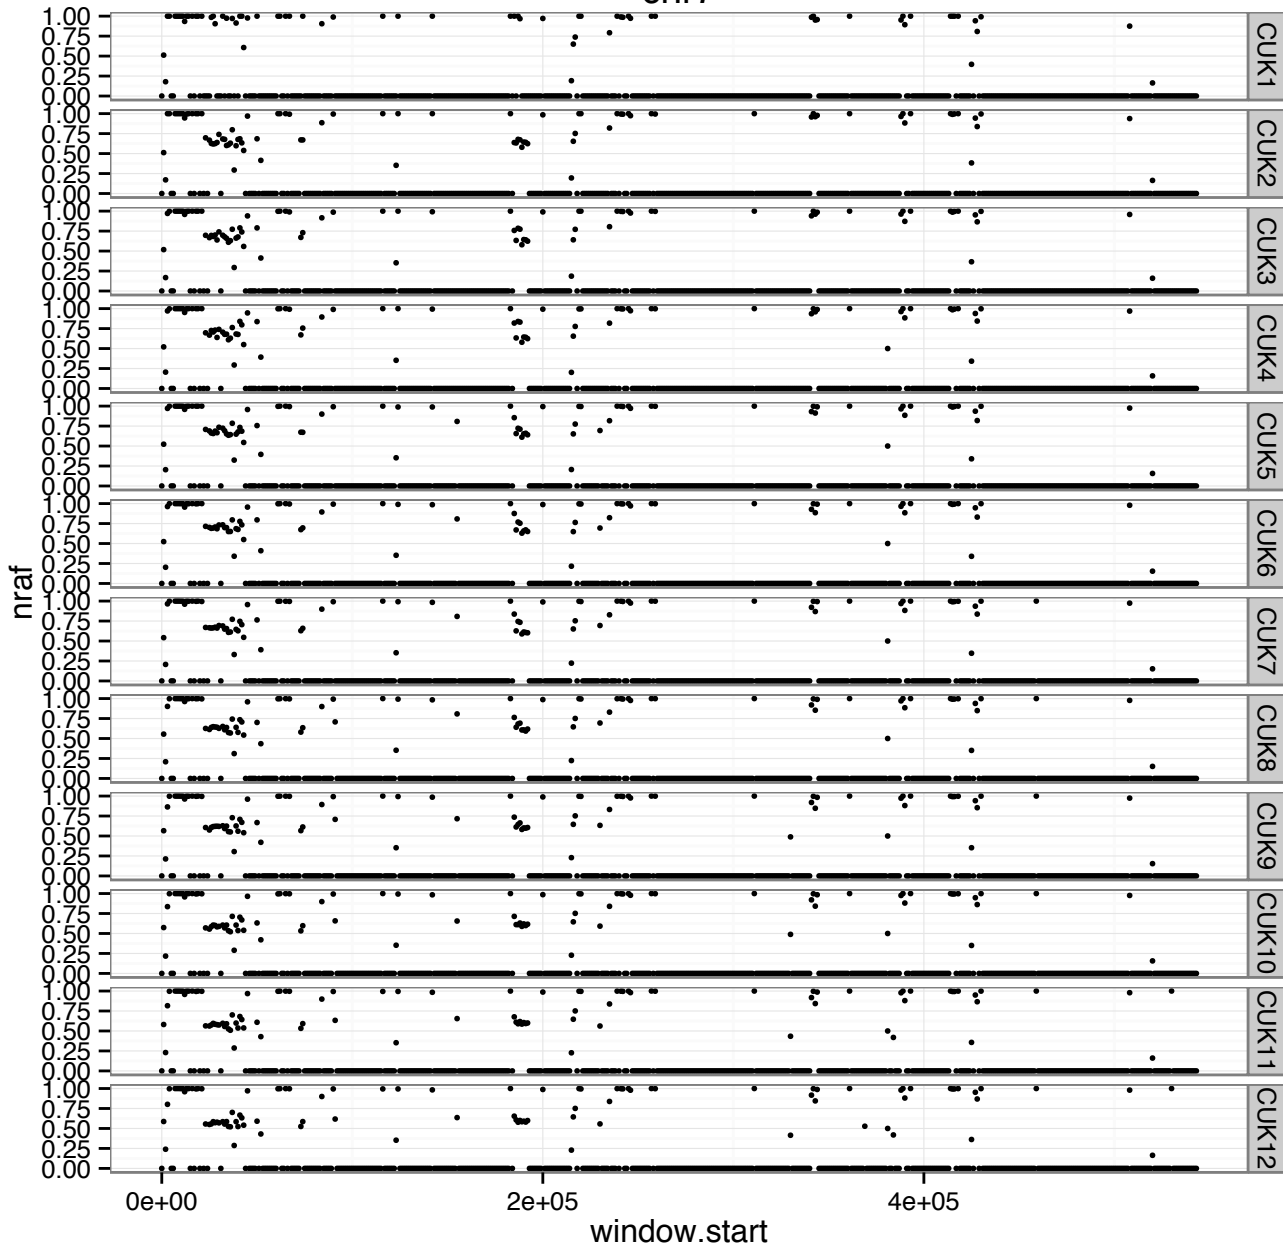

chr8

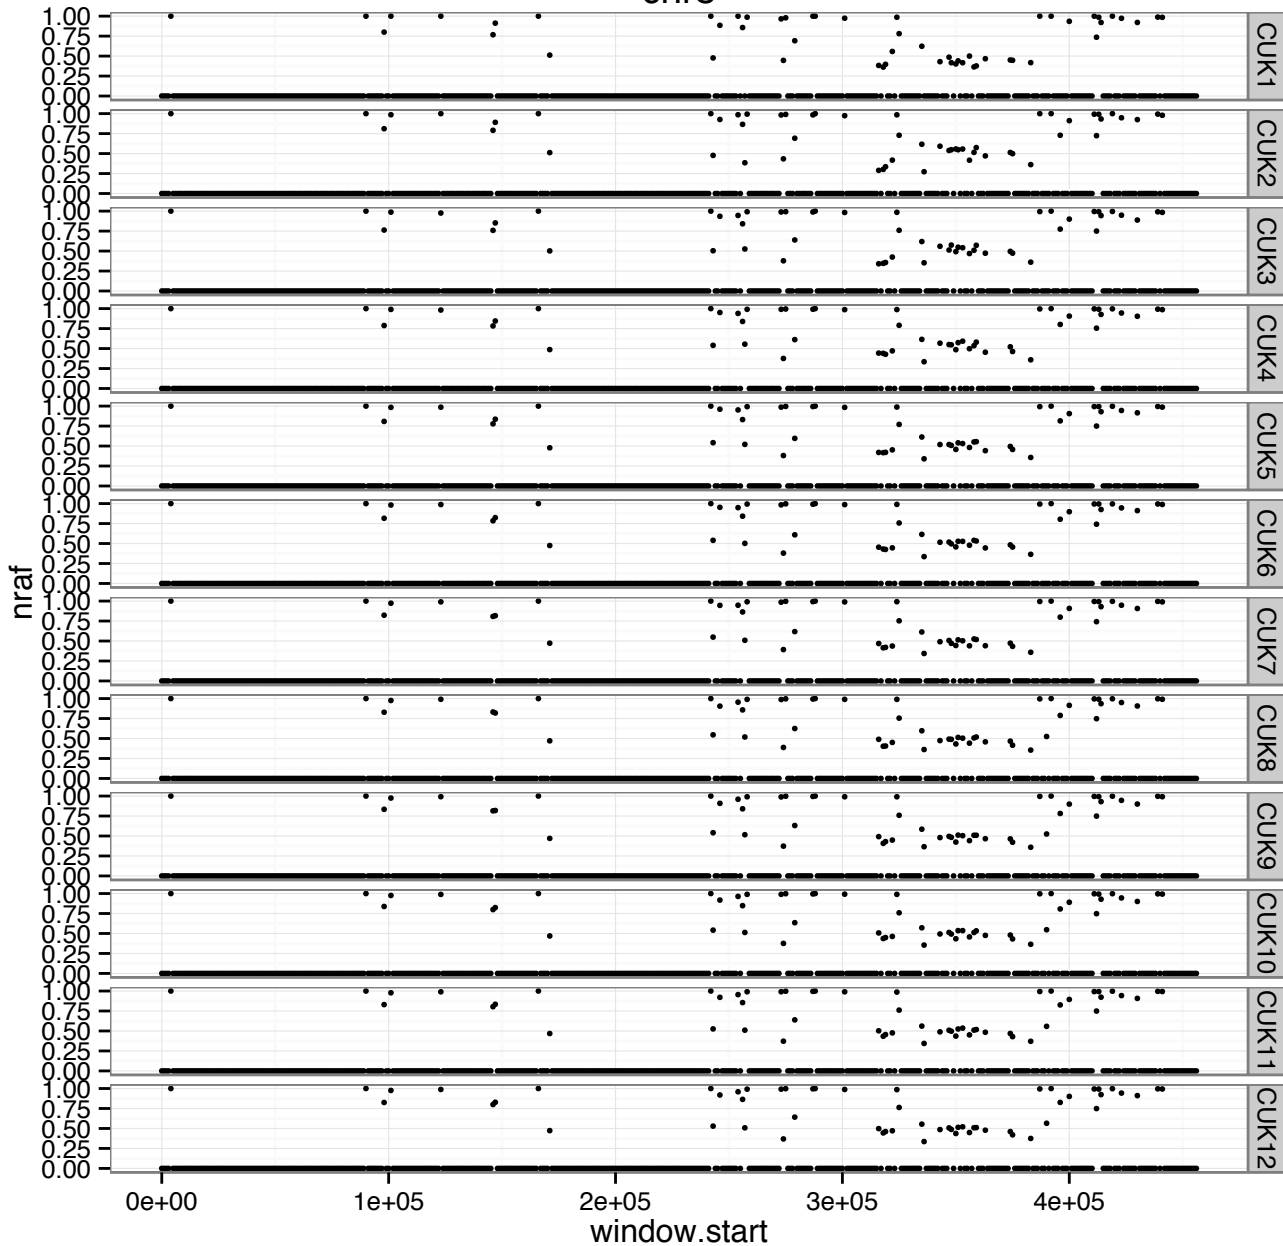



## chr9

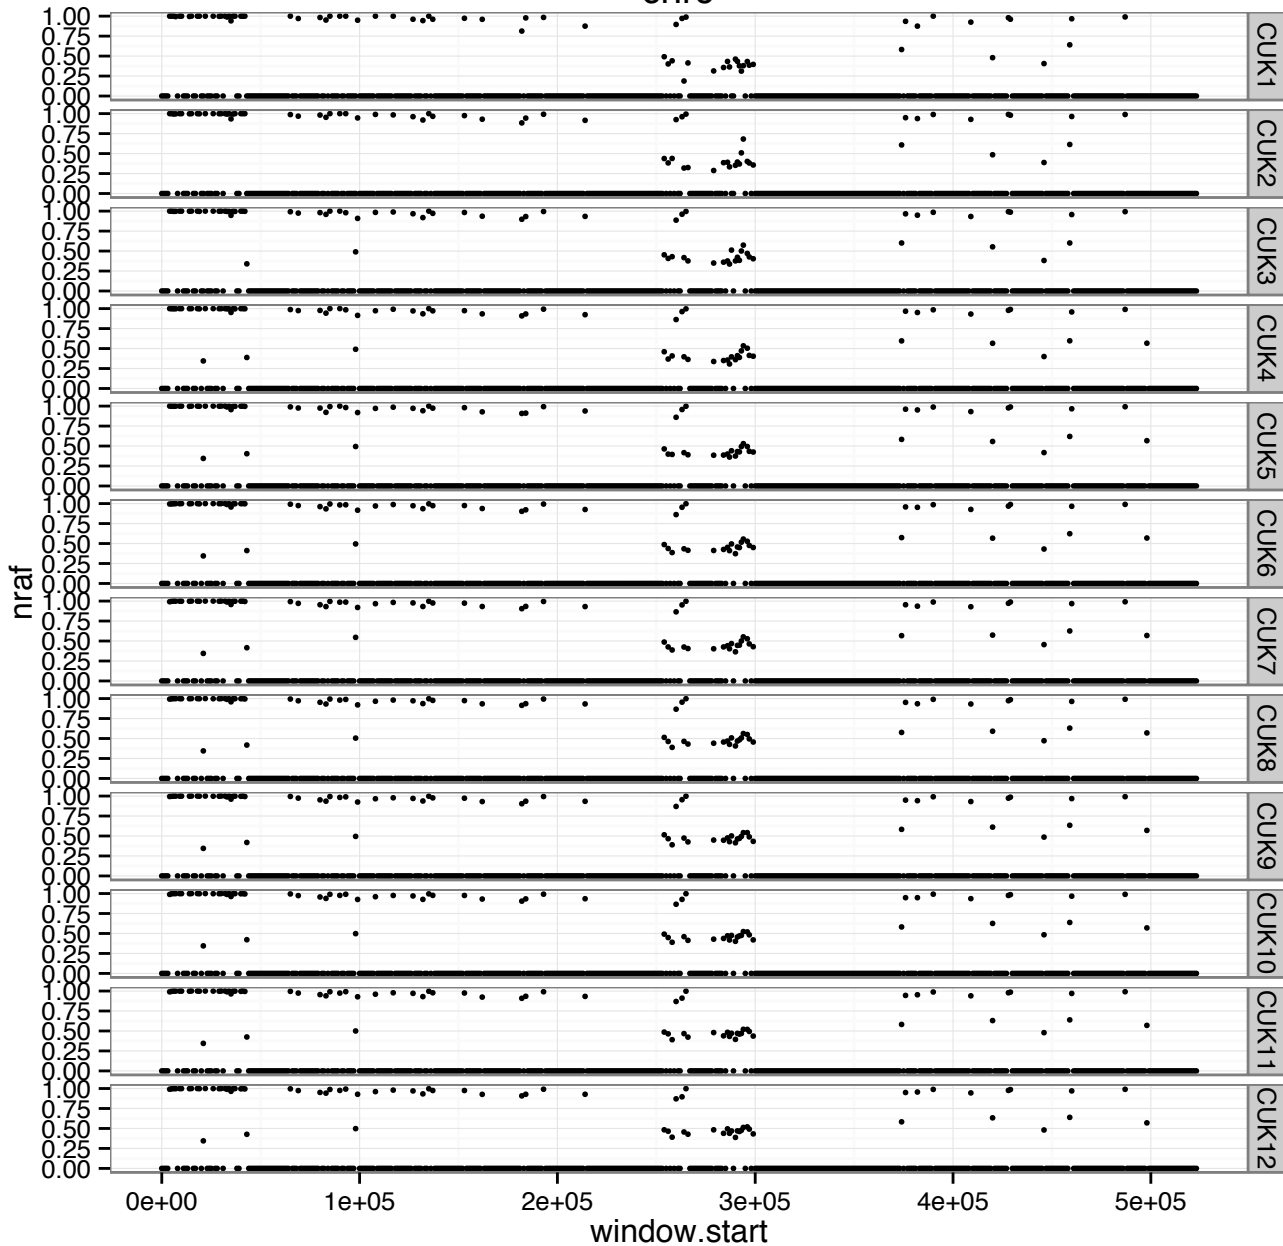

# chr10

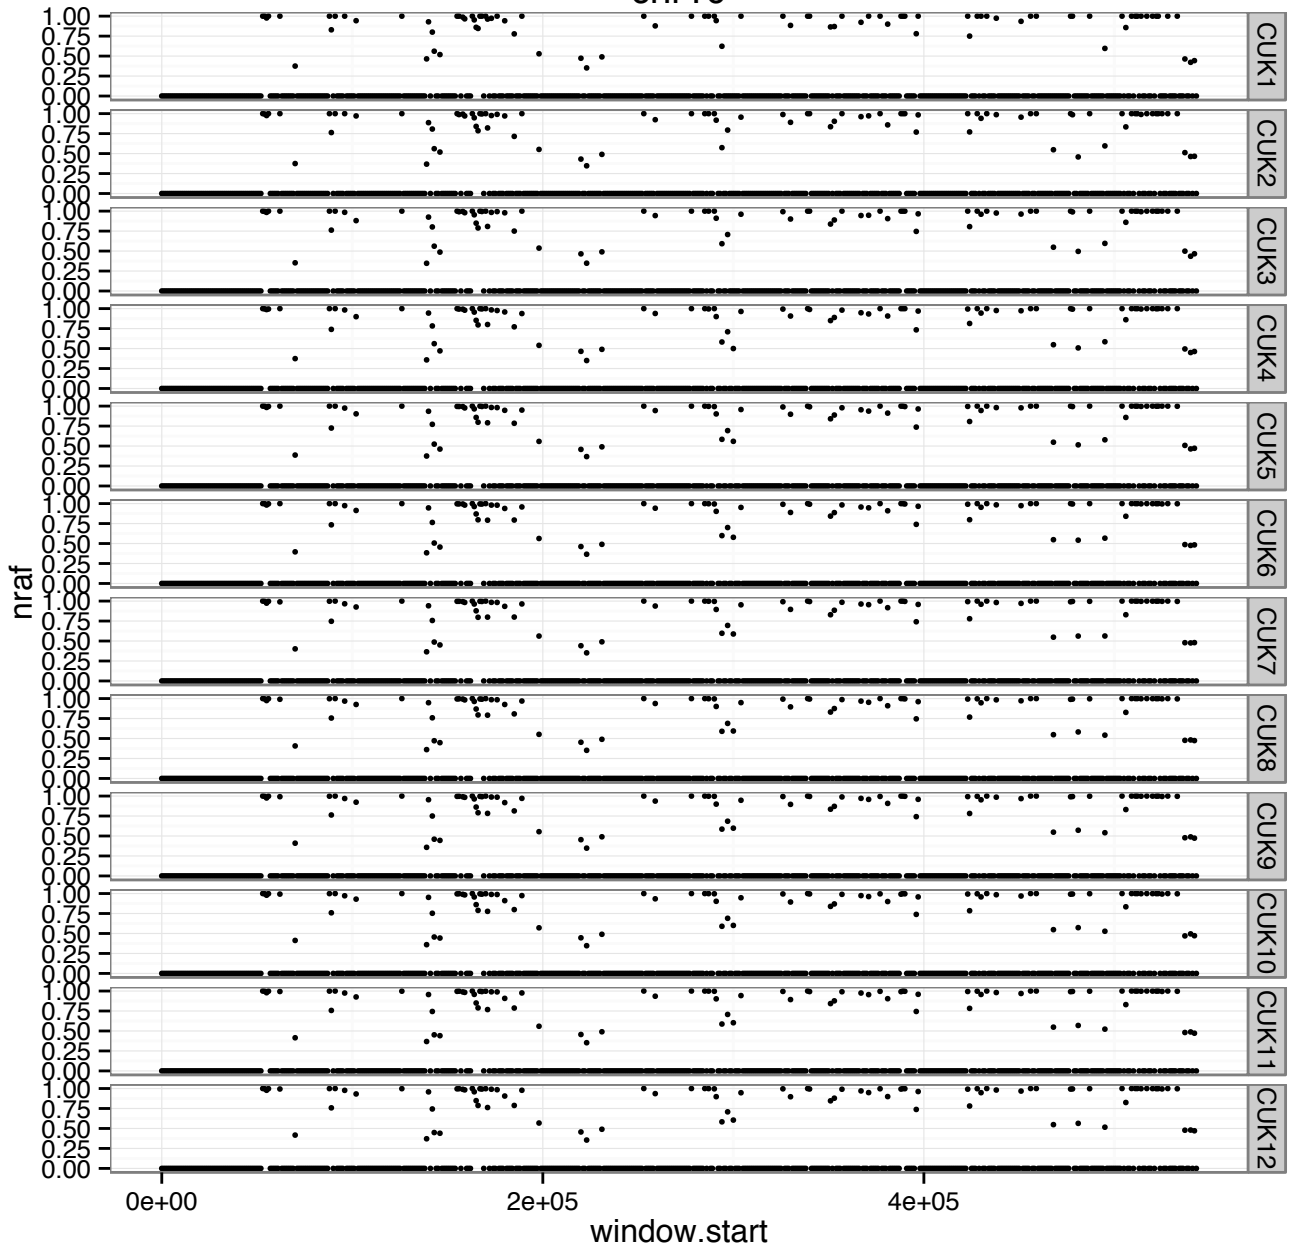

chr11

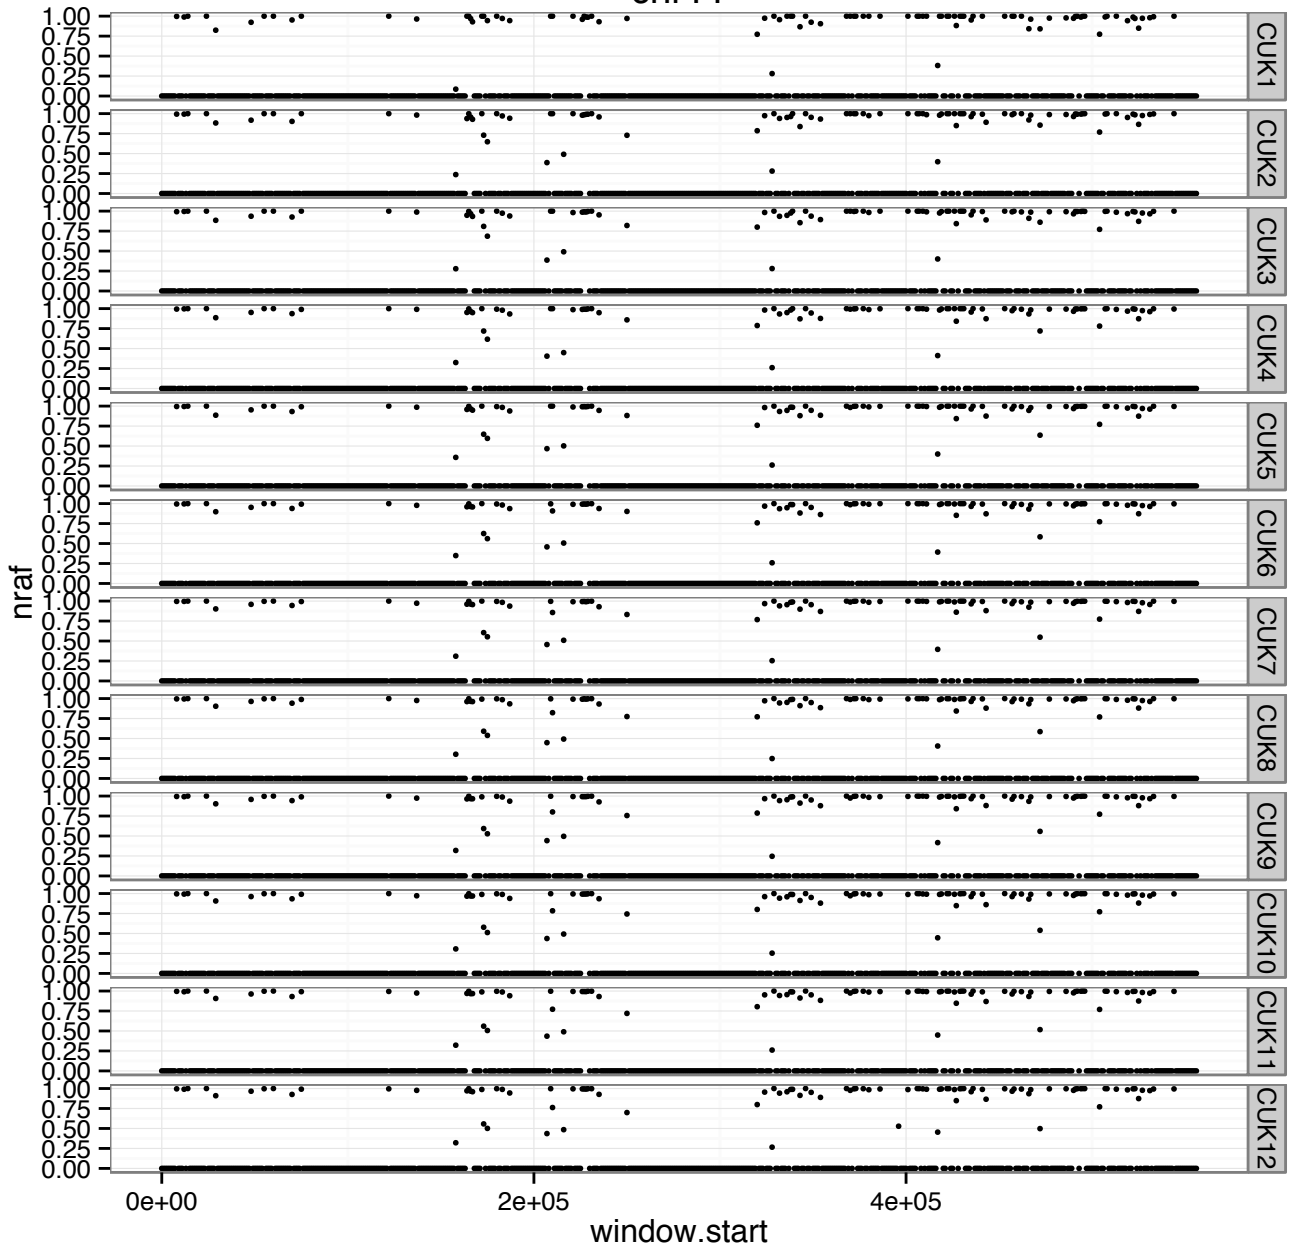

chr12

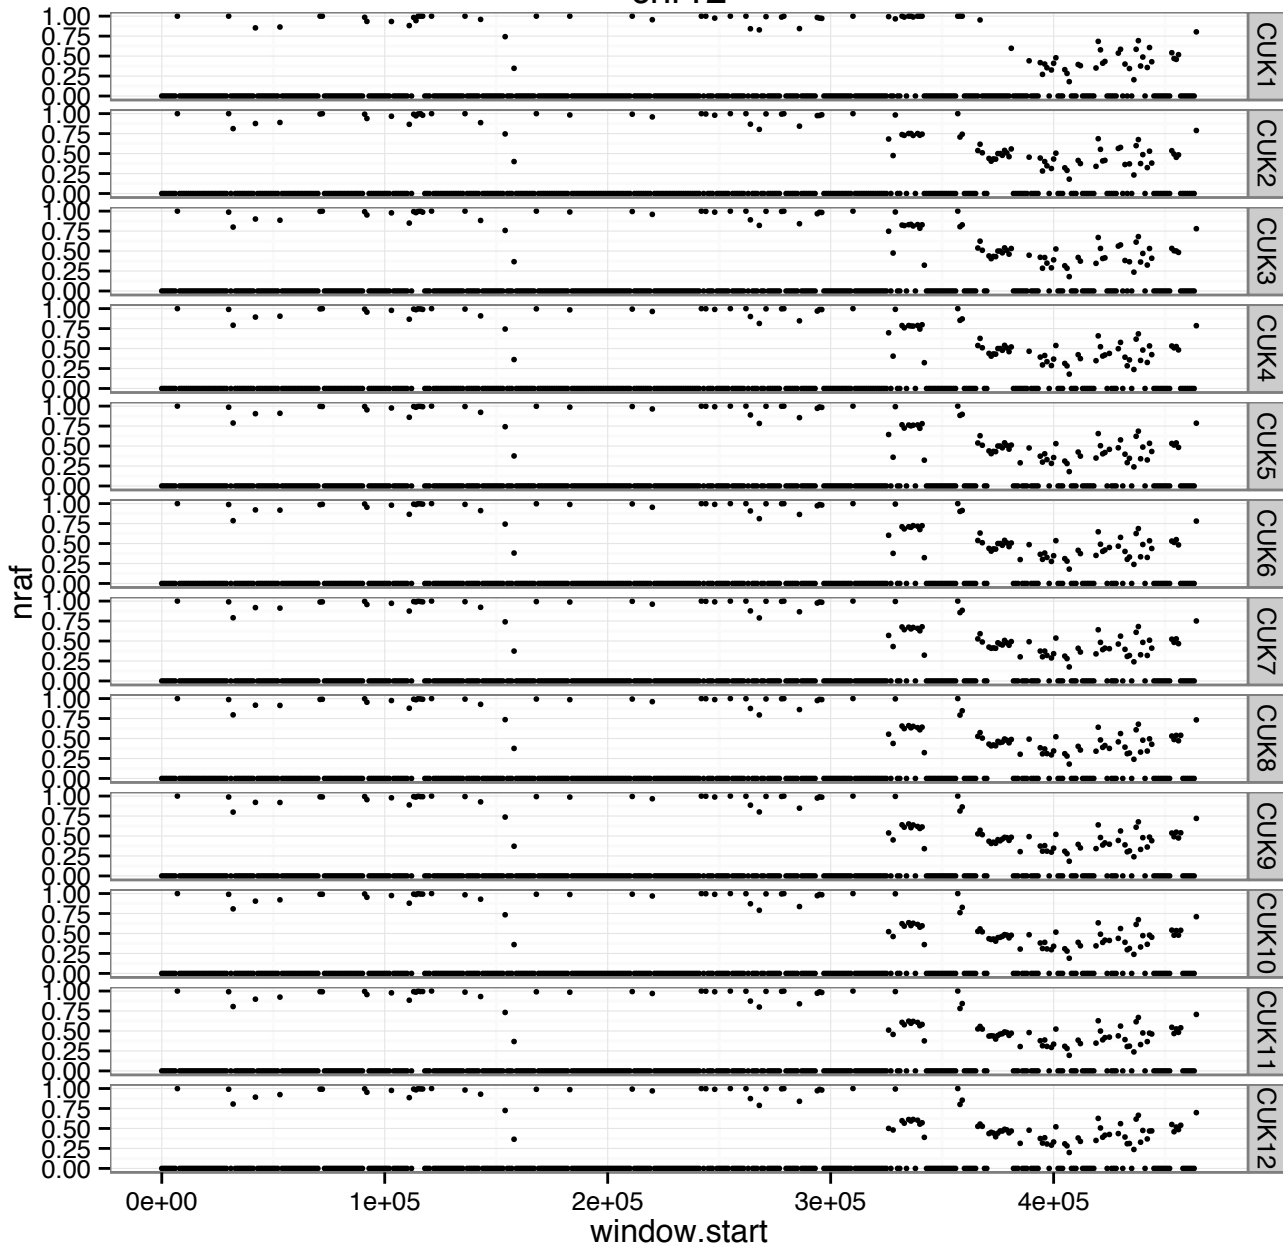

# chr13

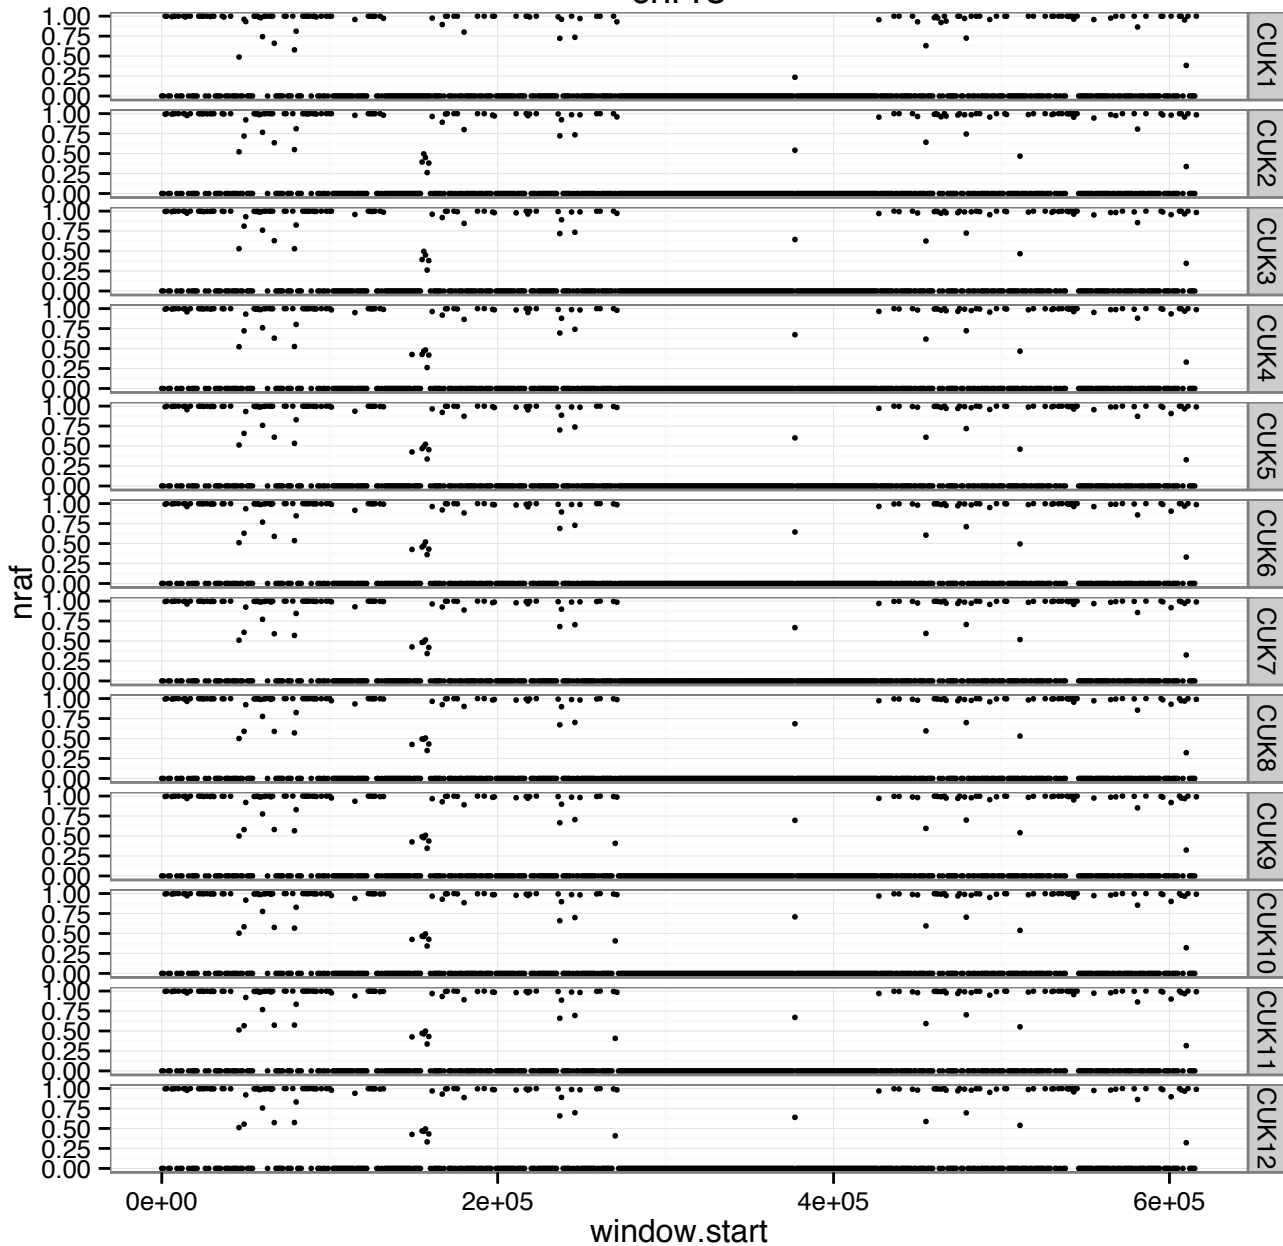

# chr14

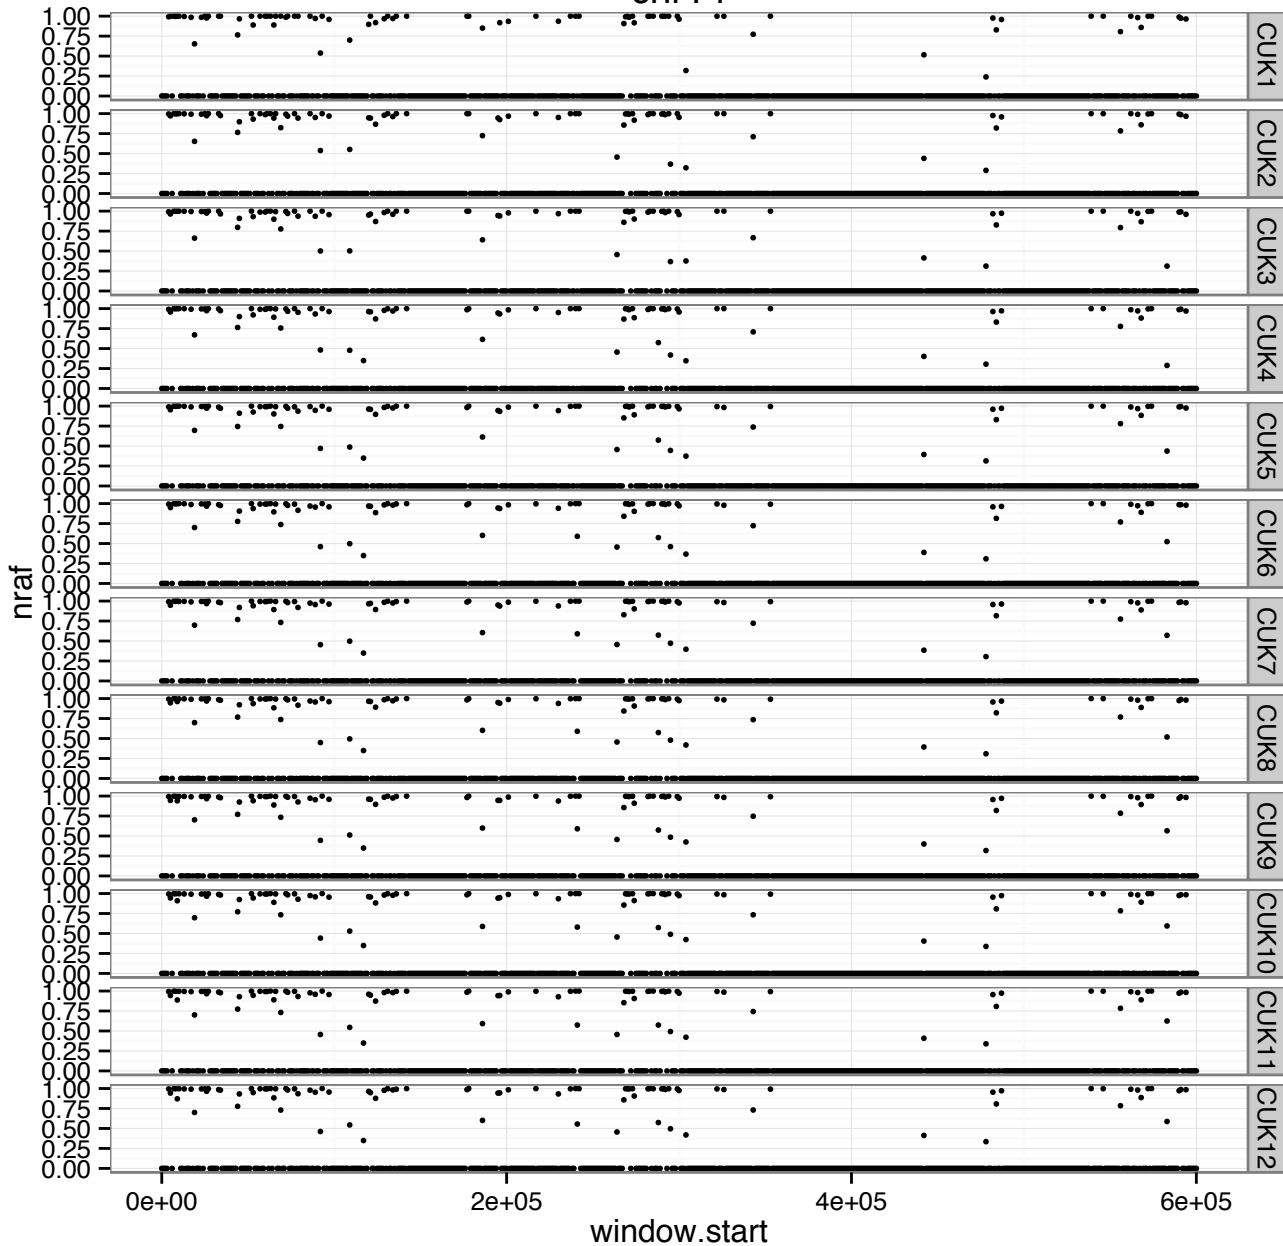

chr15

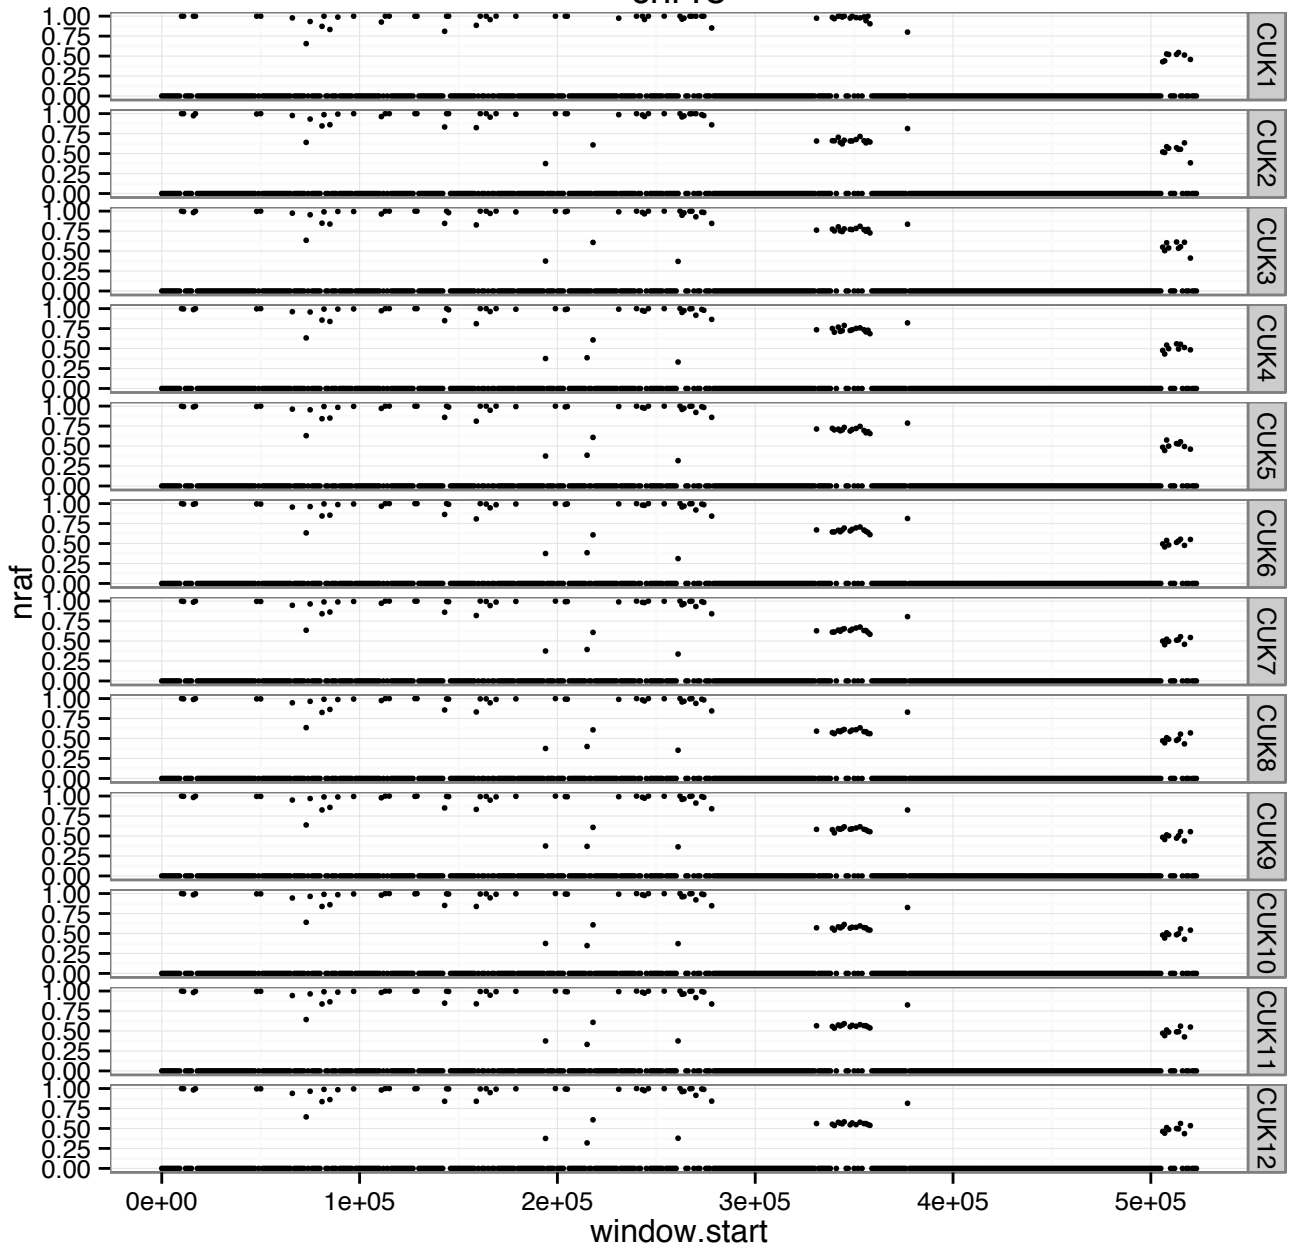

chr16

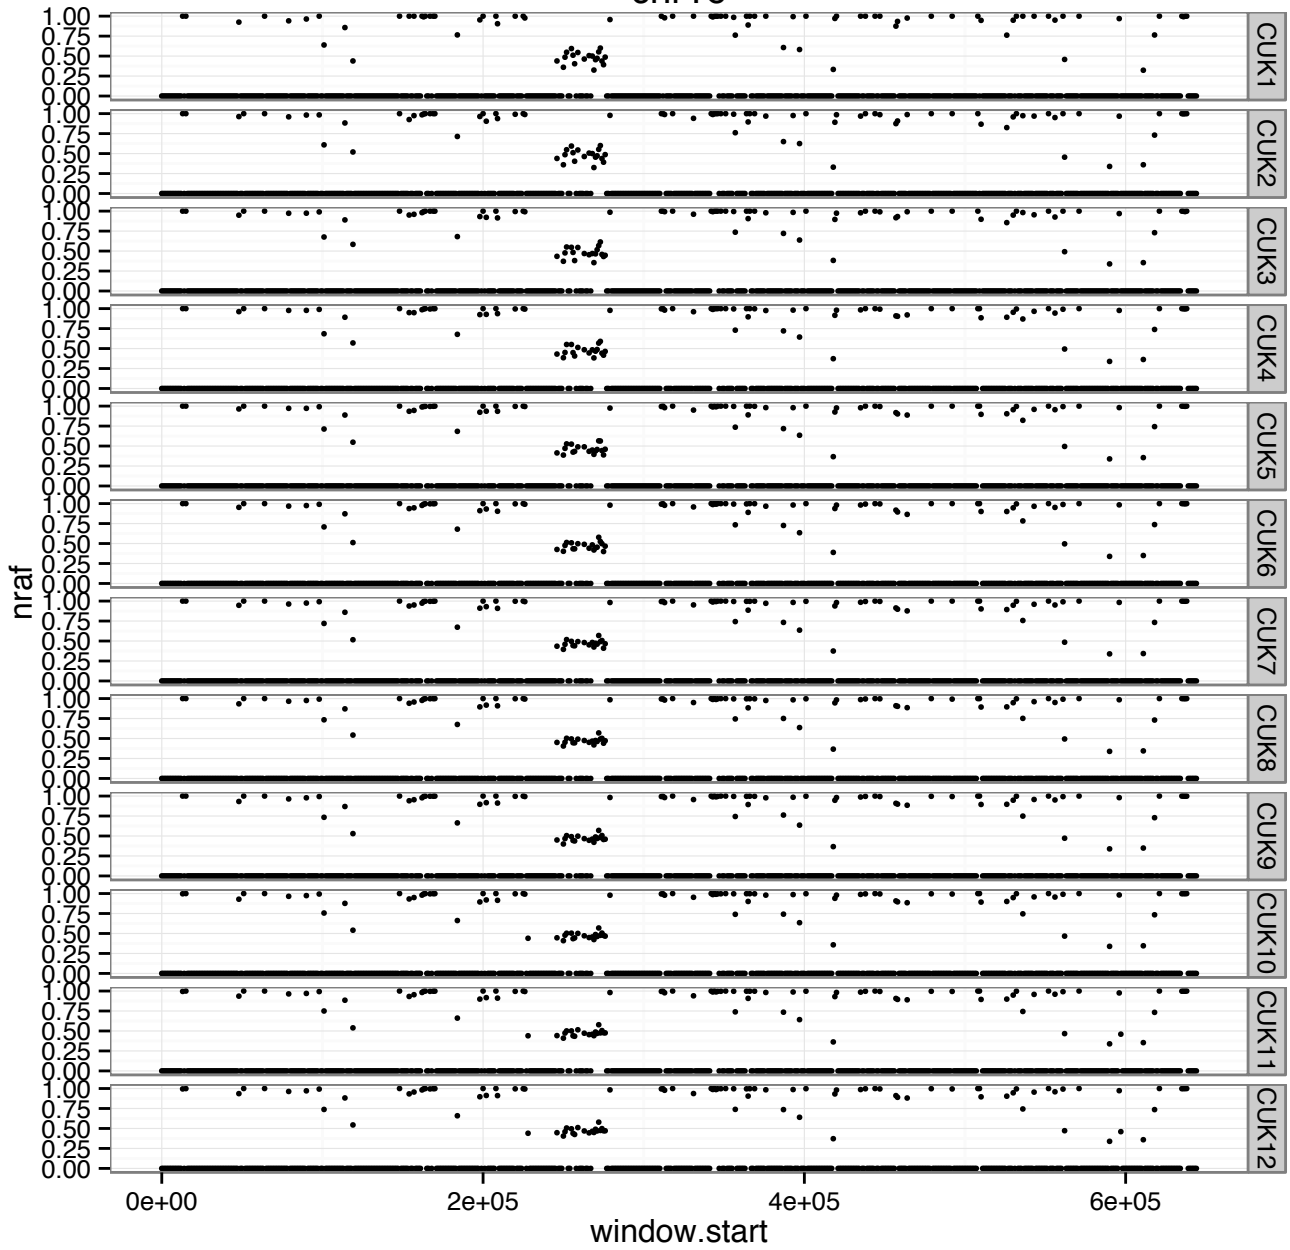



chr17

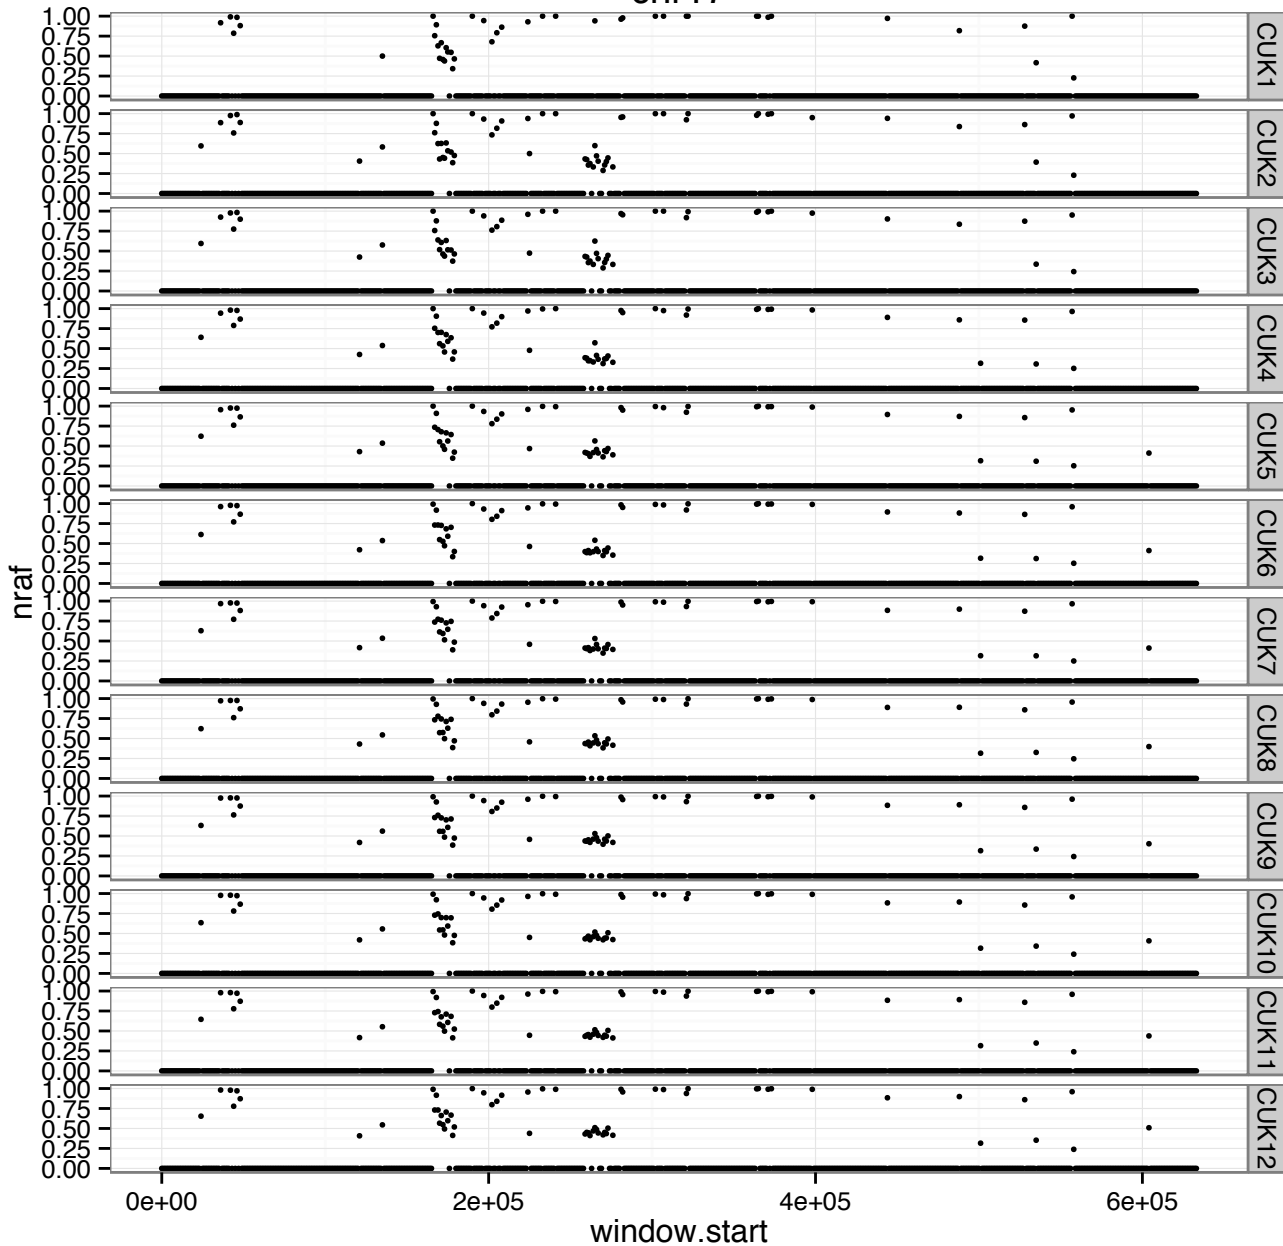

chr18

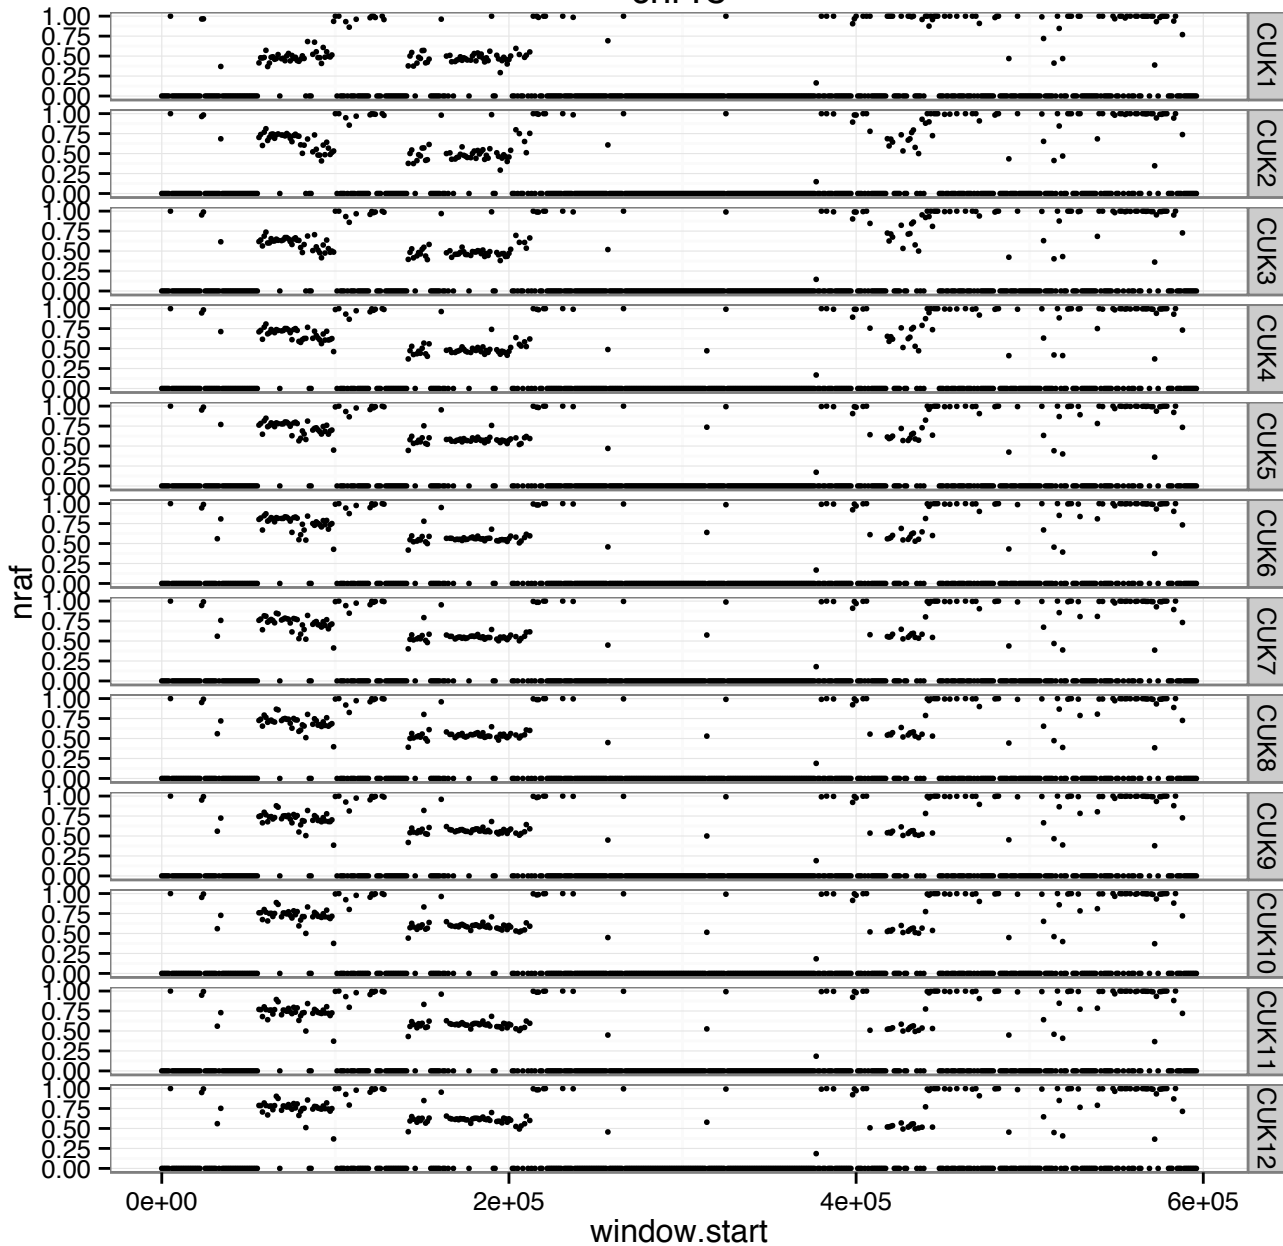

chr19

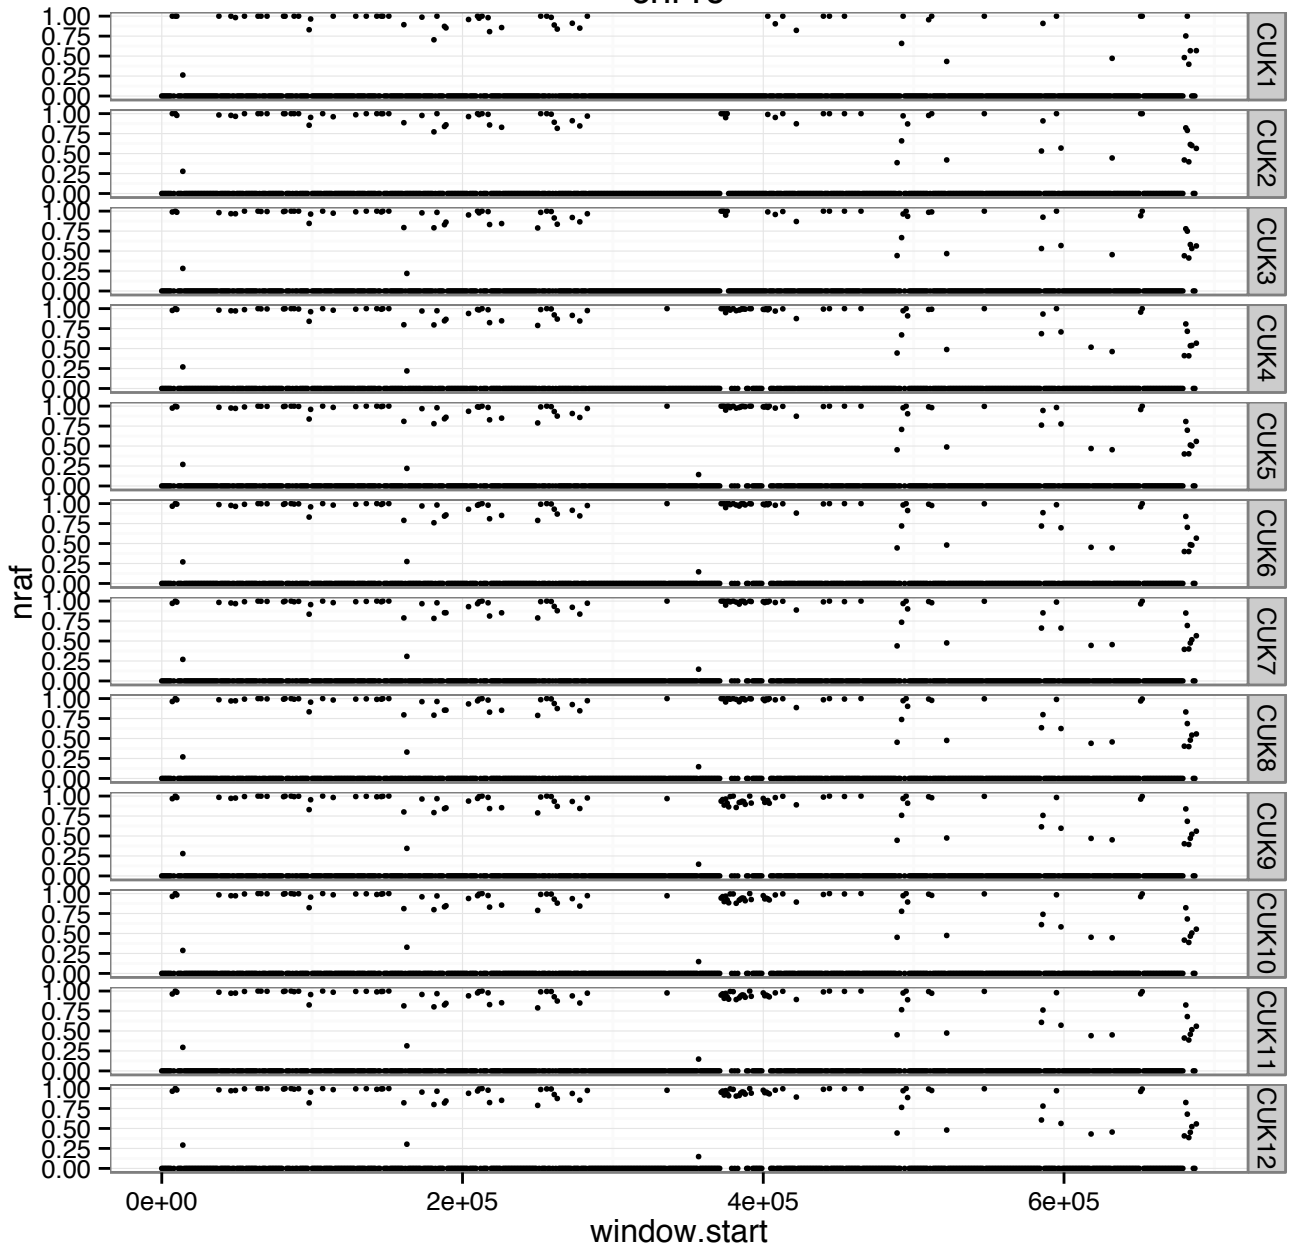

# chr20

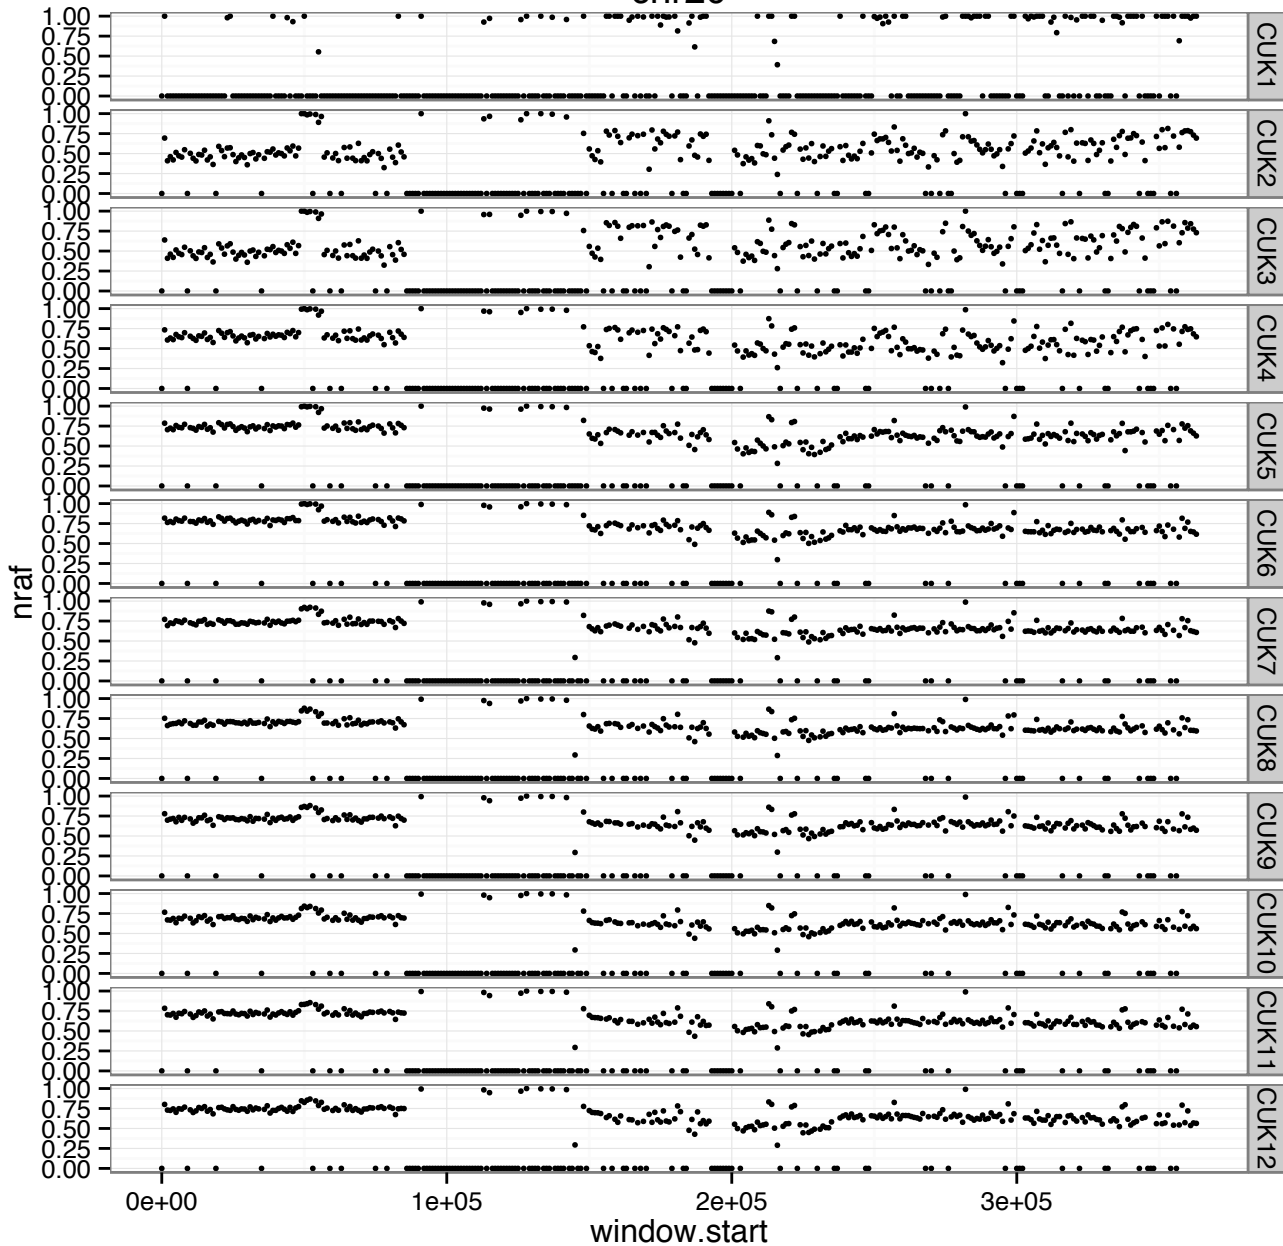

chr21

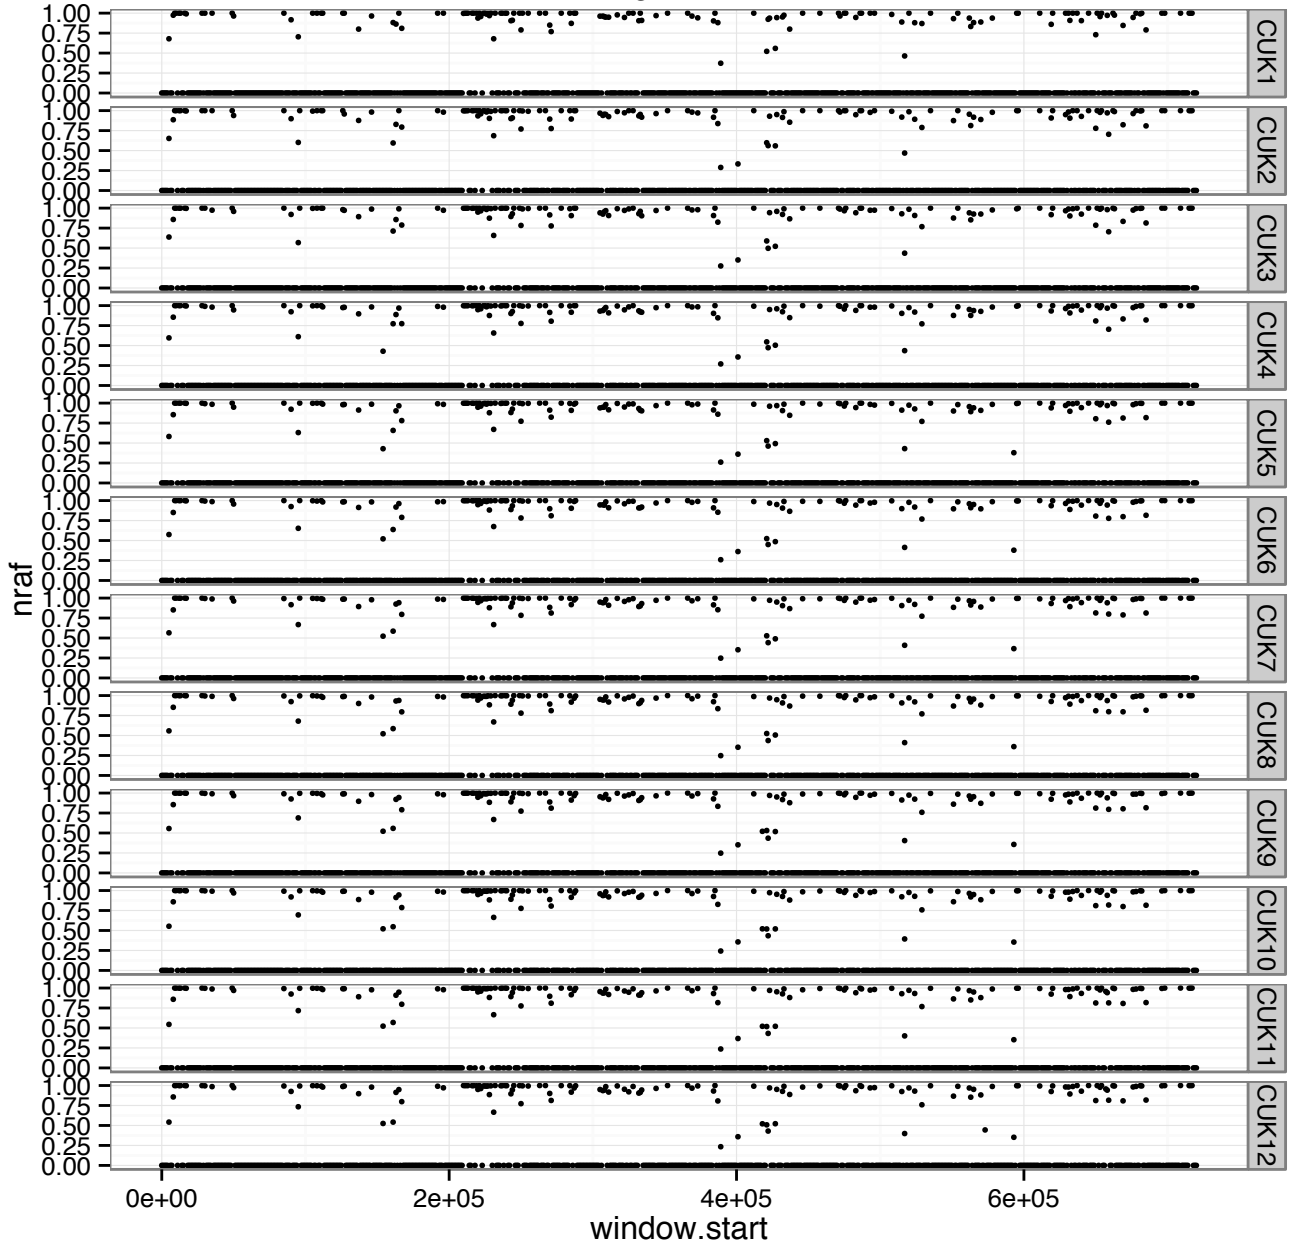

chr22

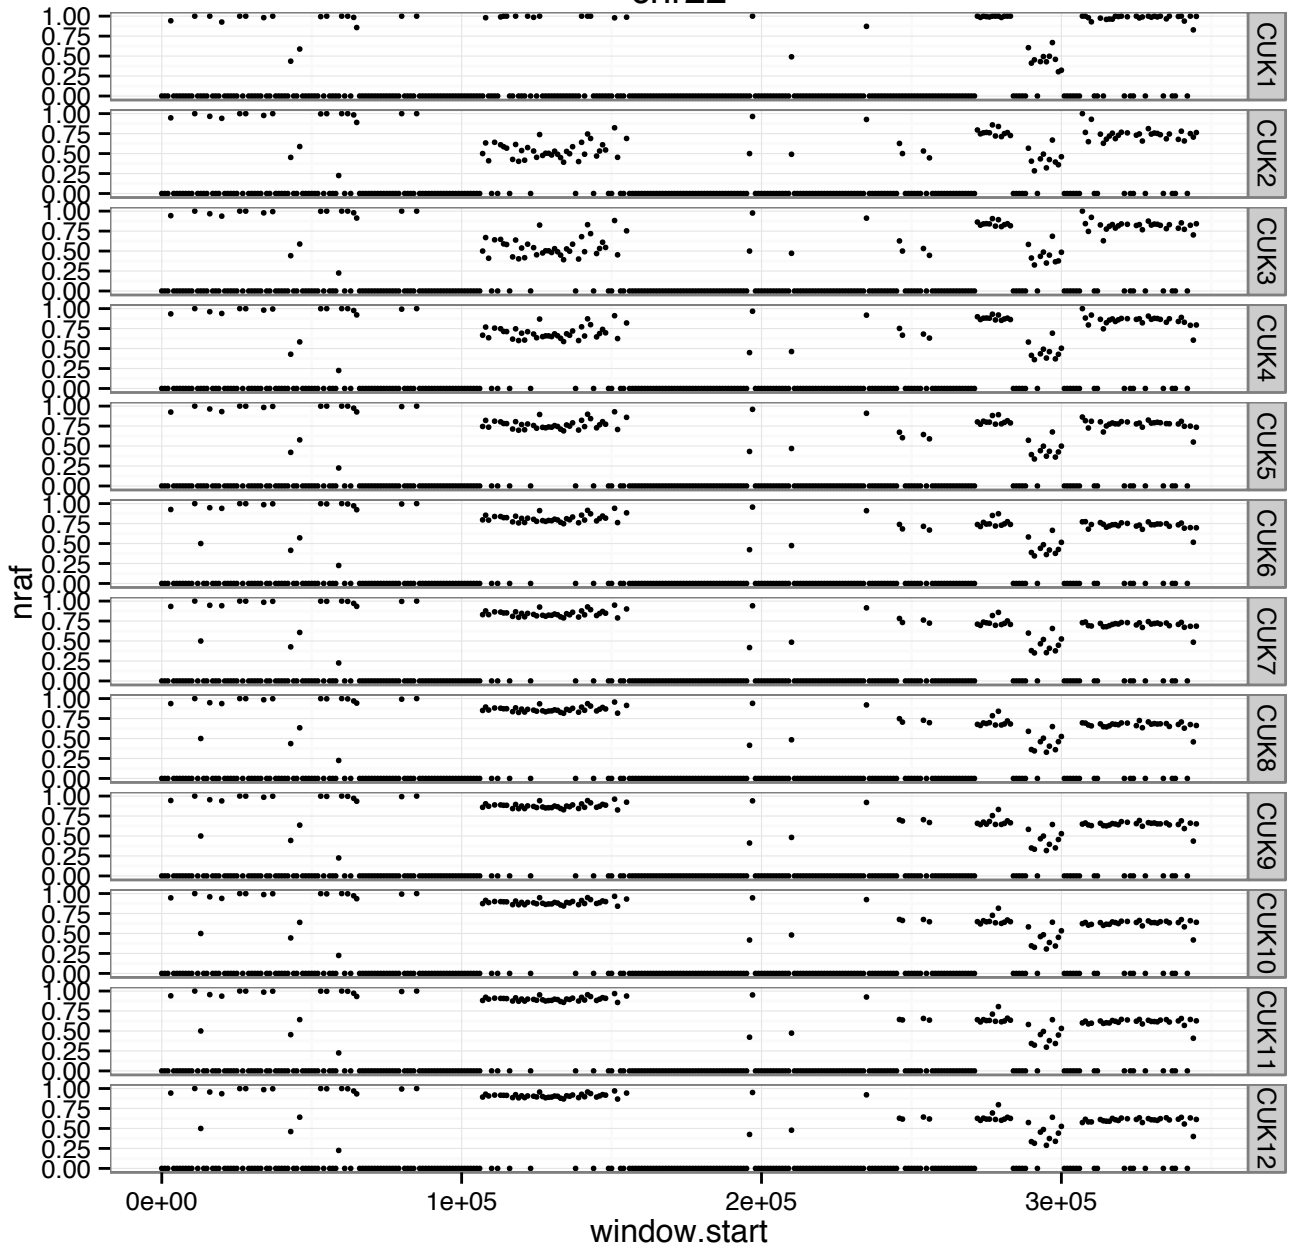

chr23

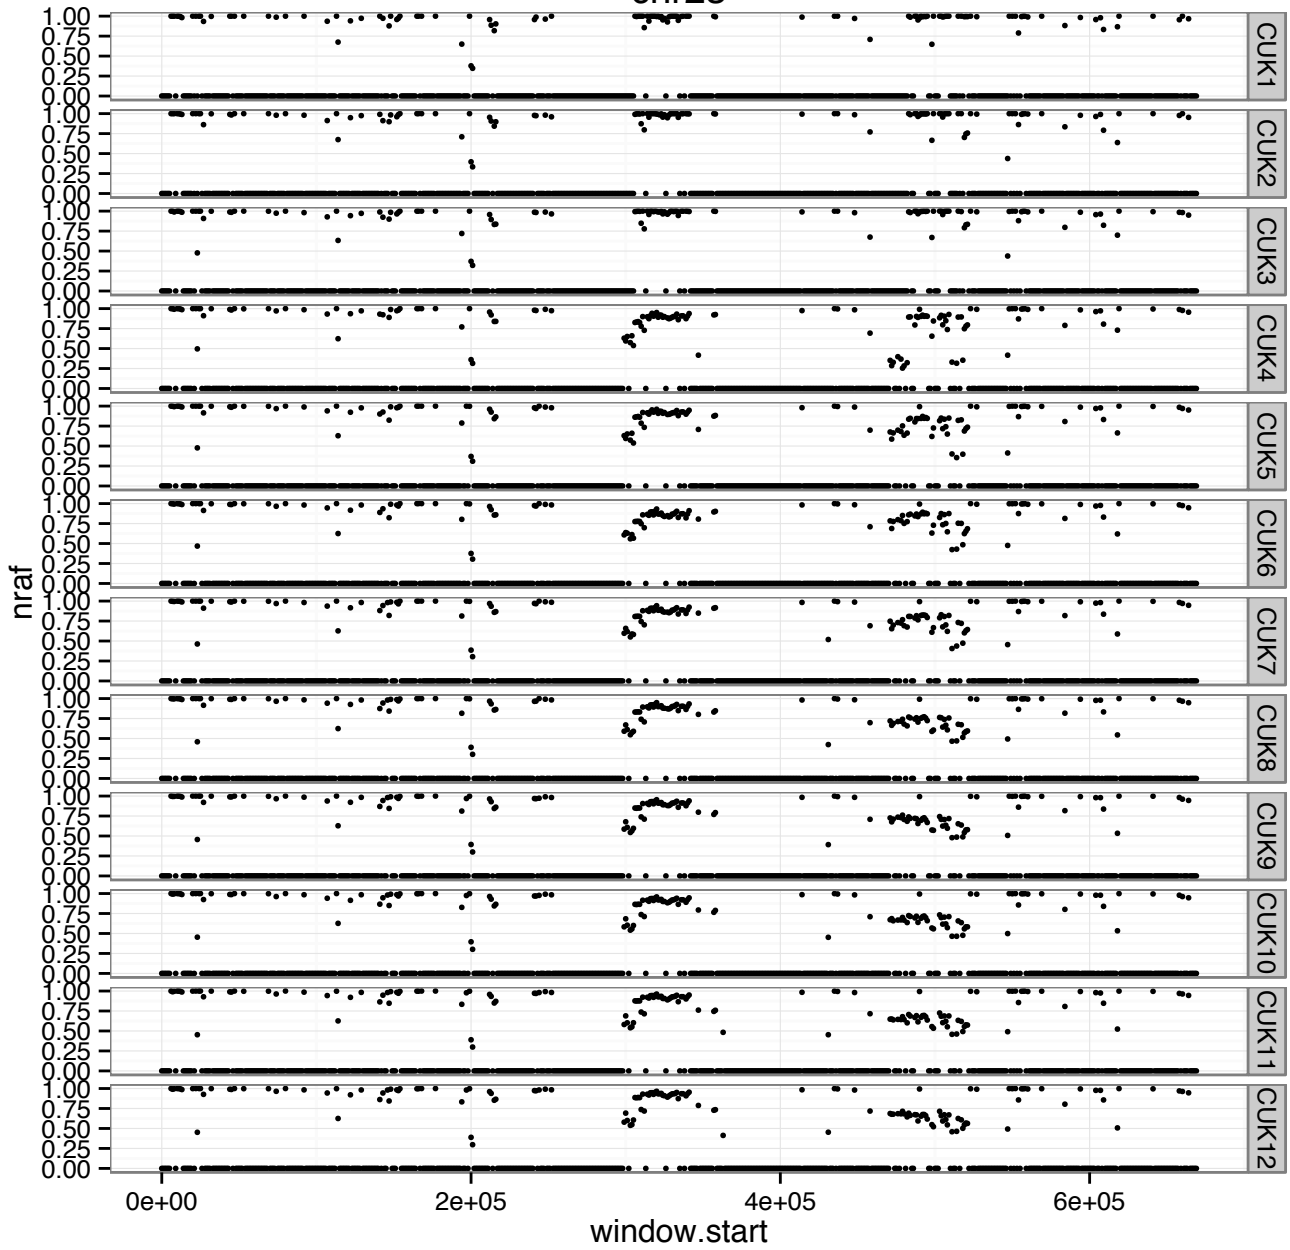

# chr24

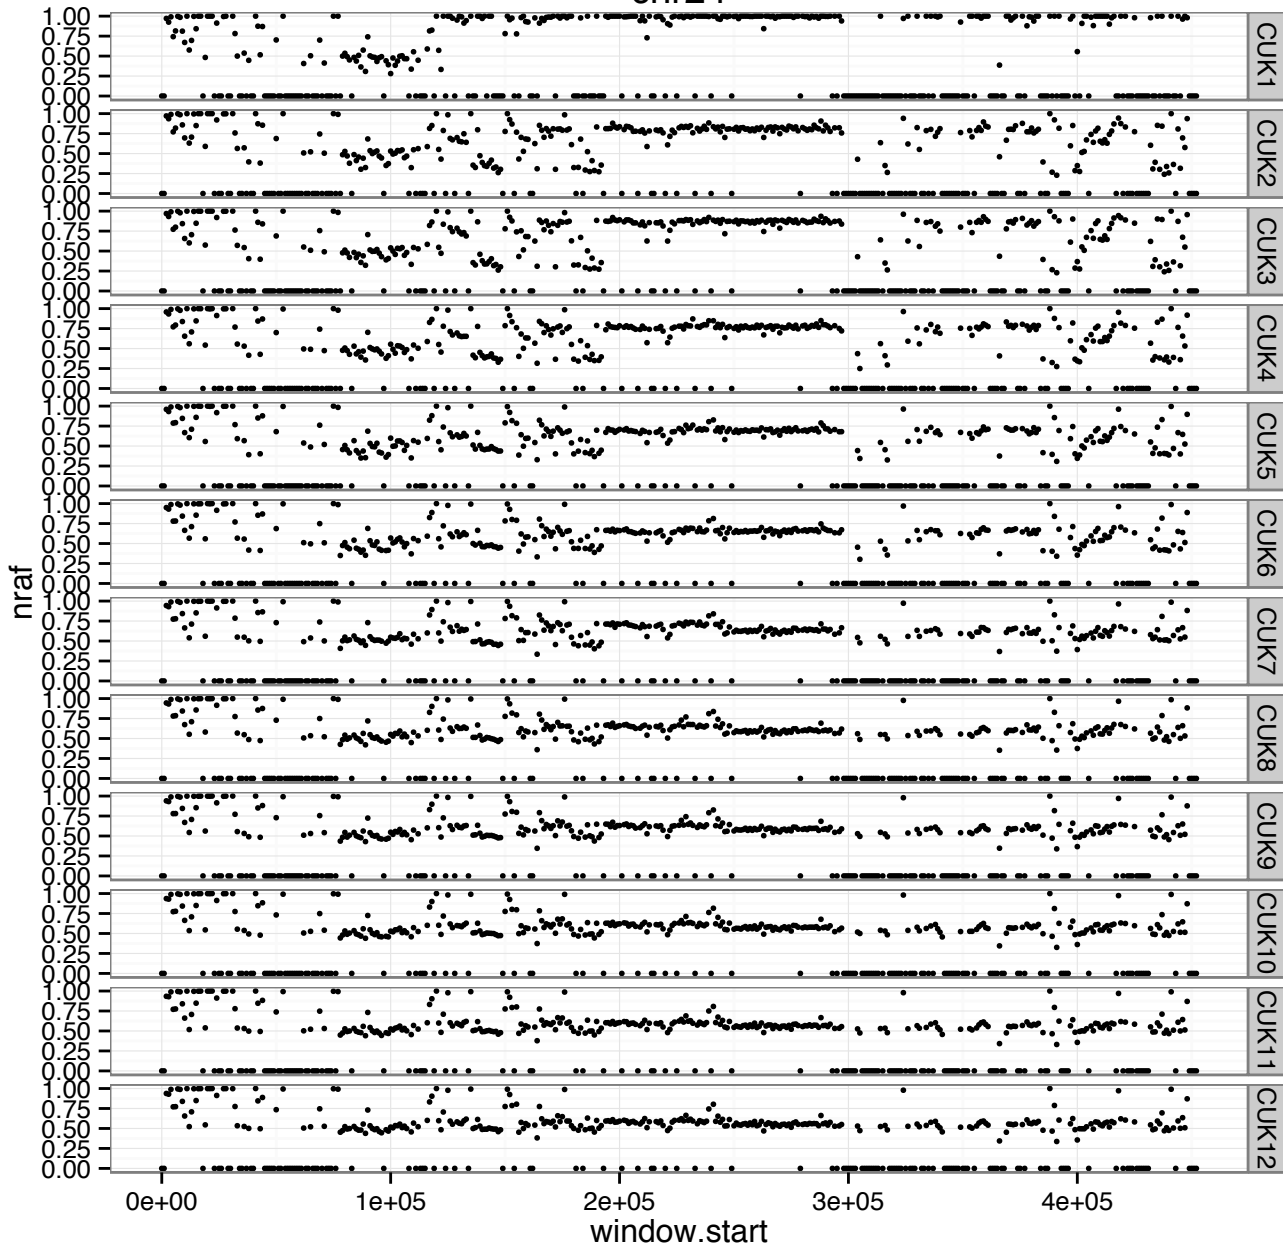



chr25

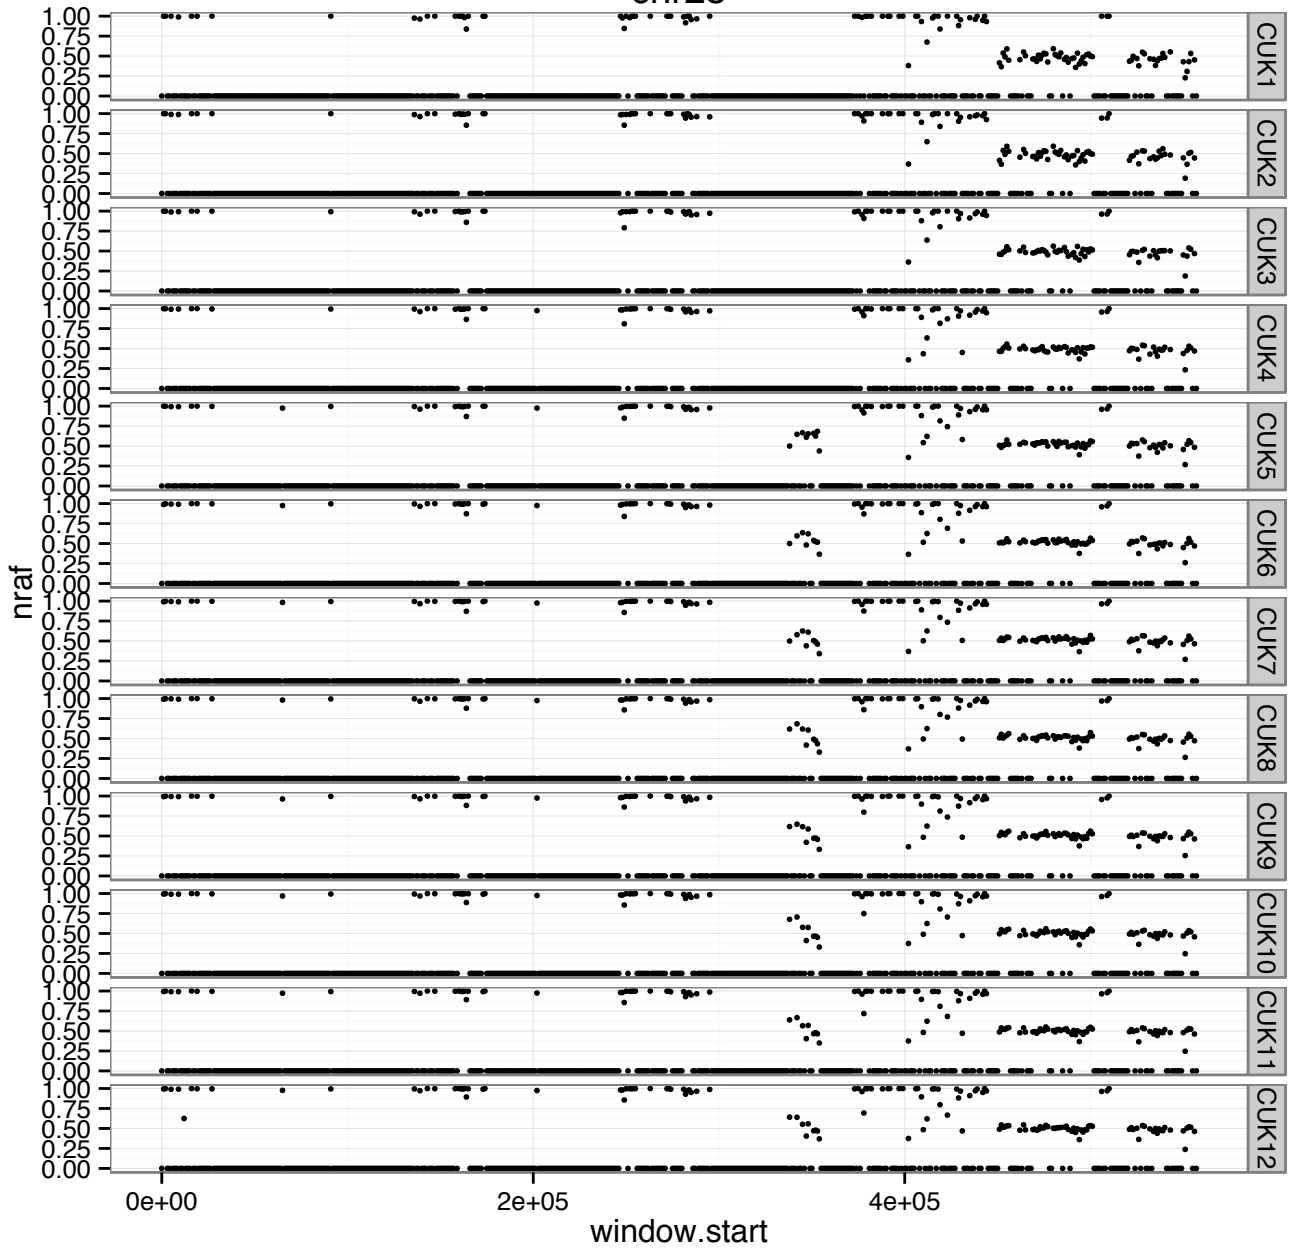

chr26

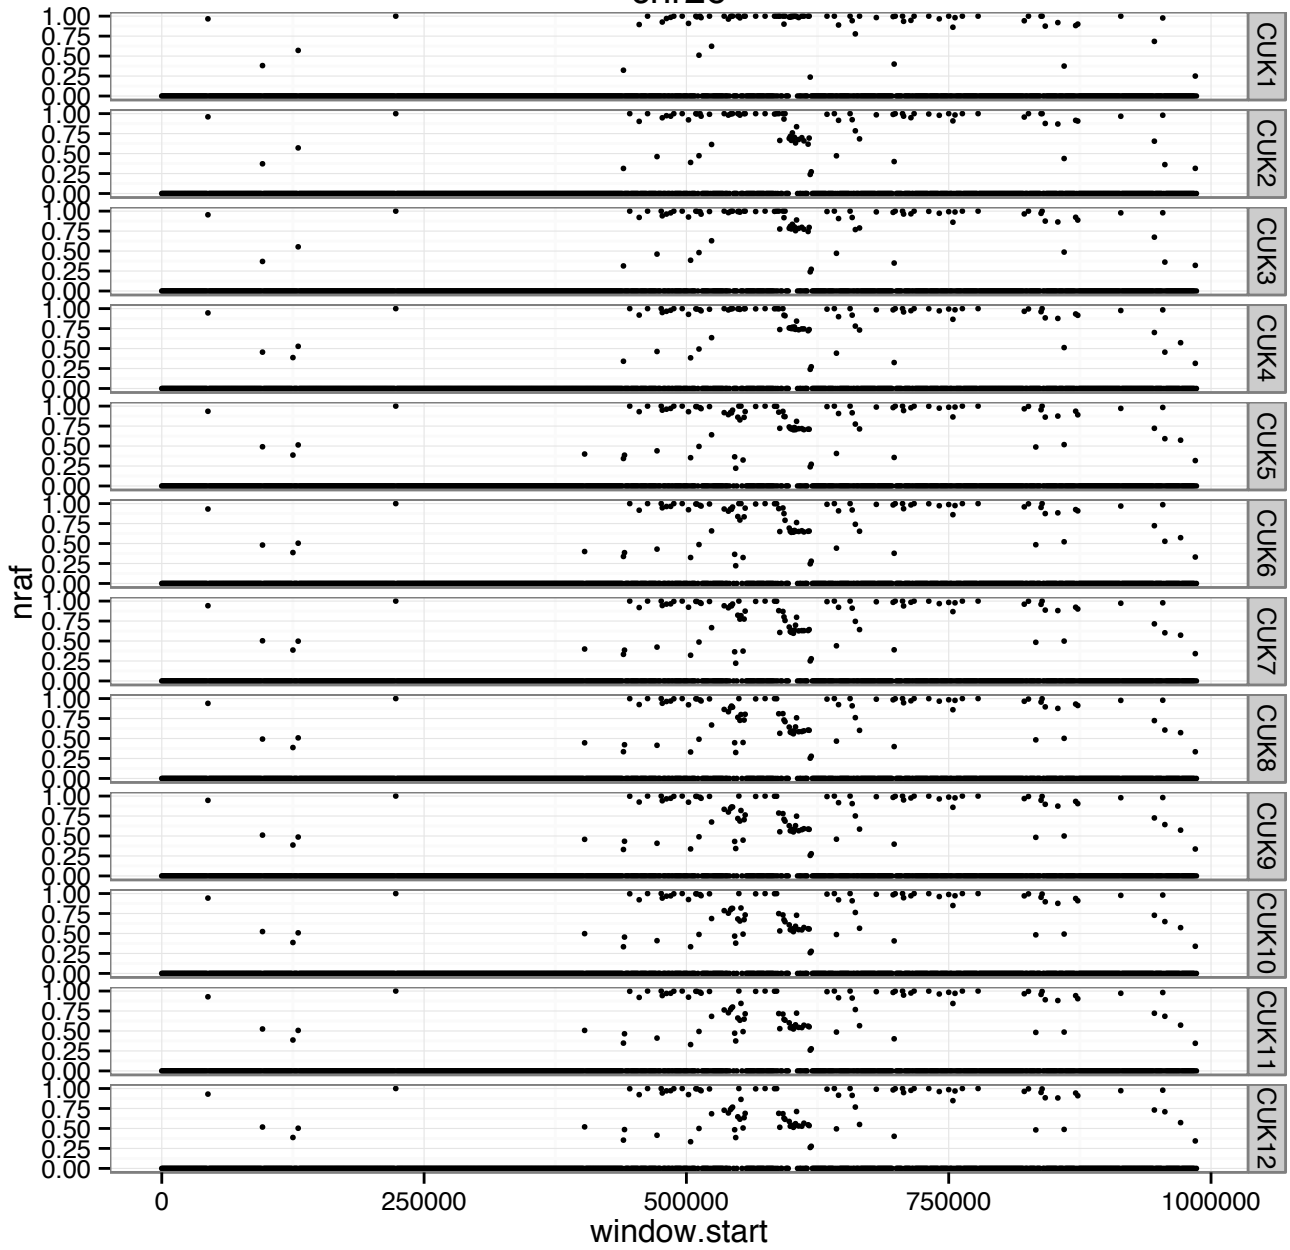

chr27

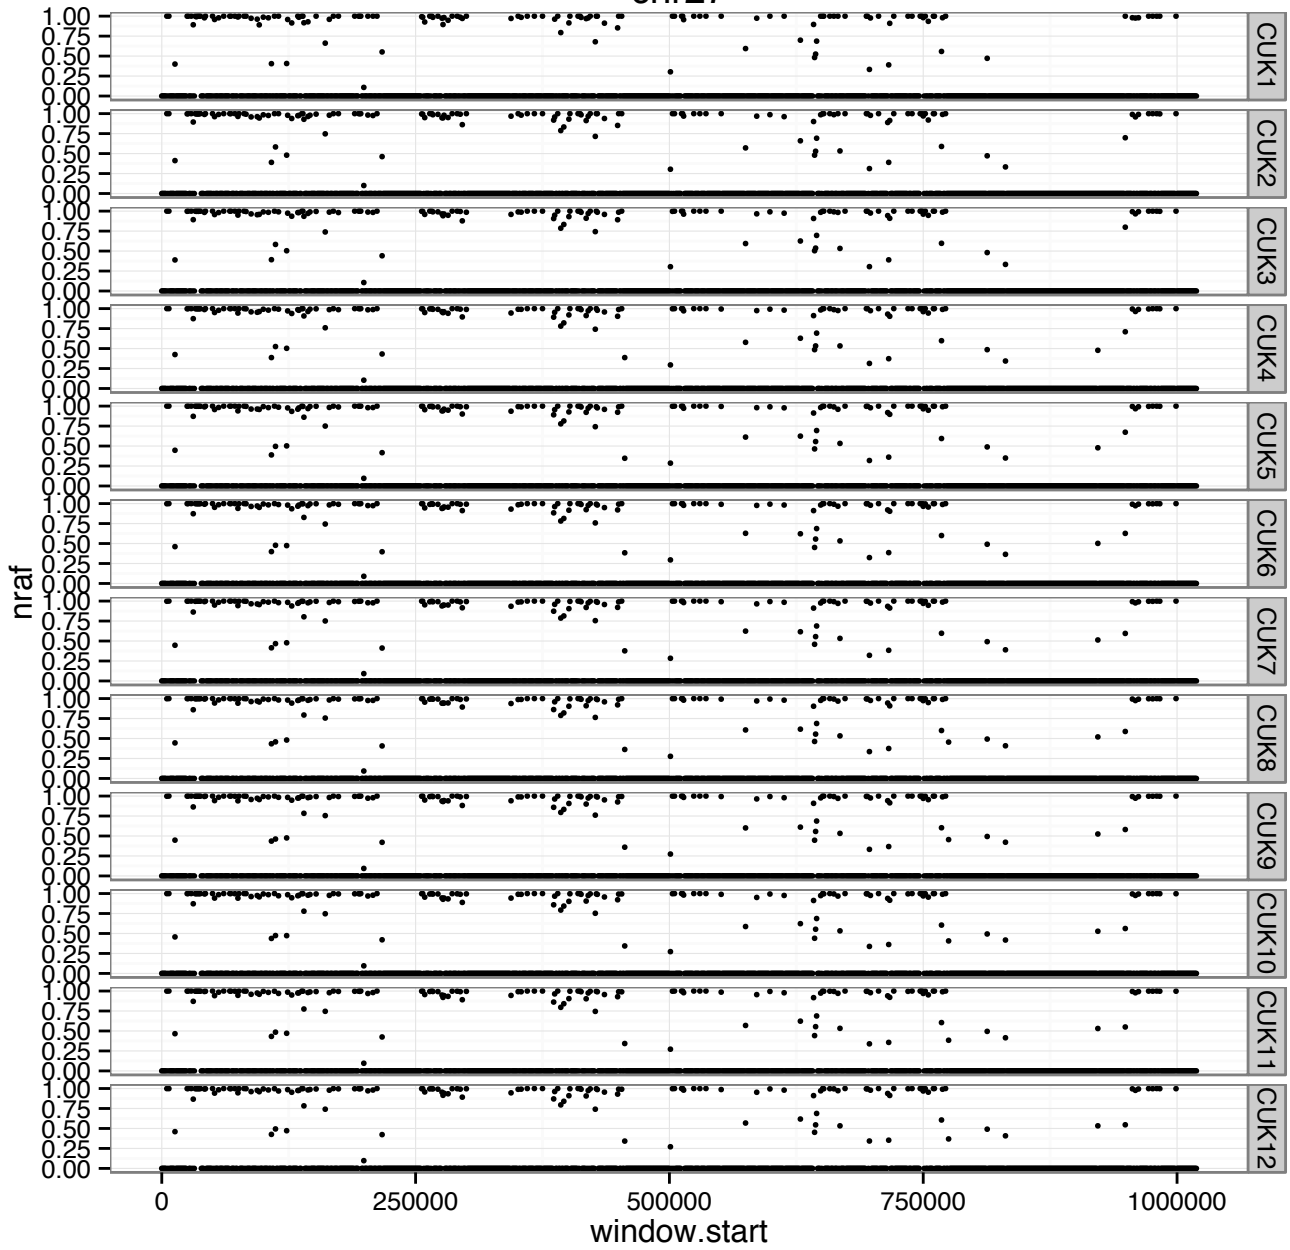

# chr28

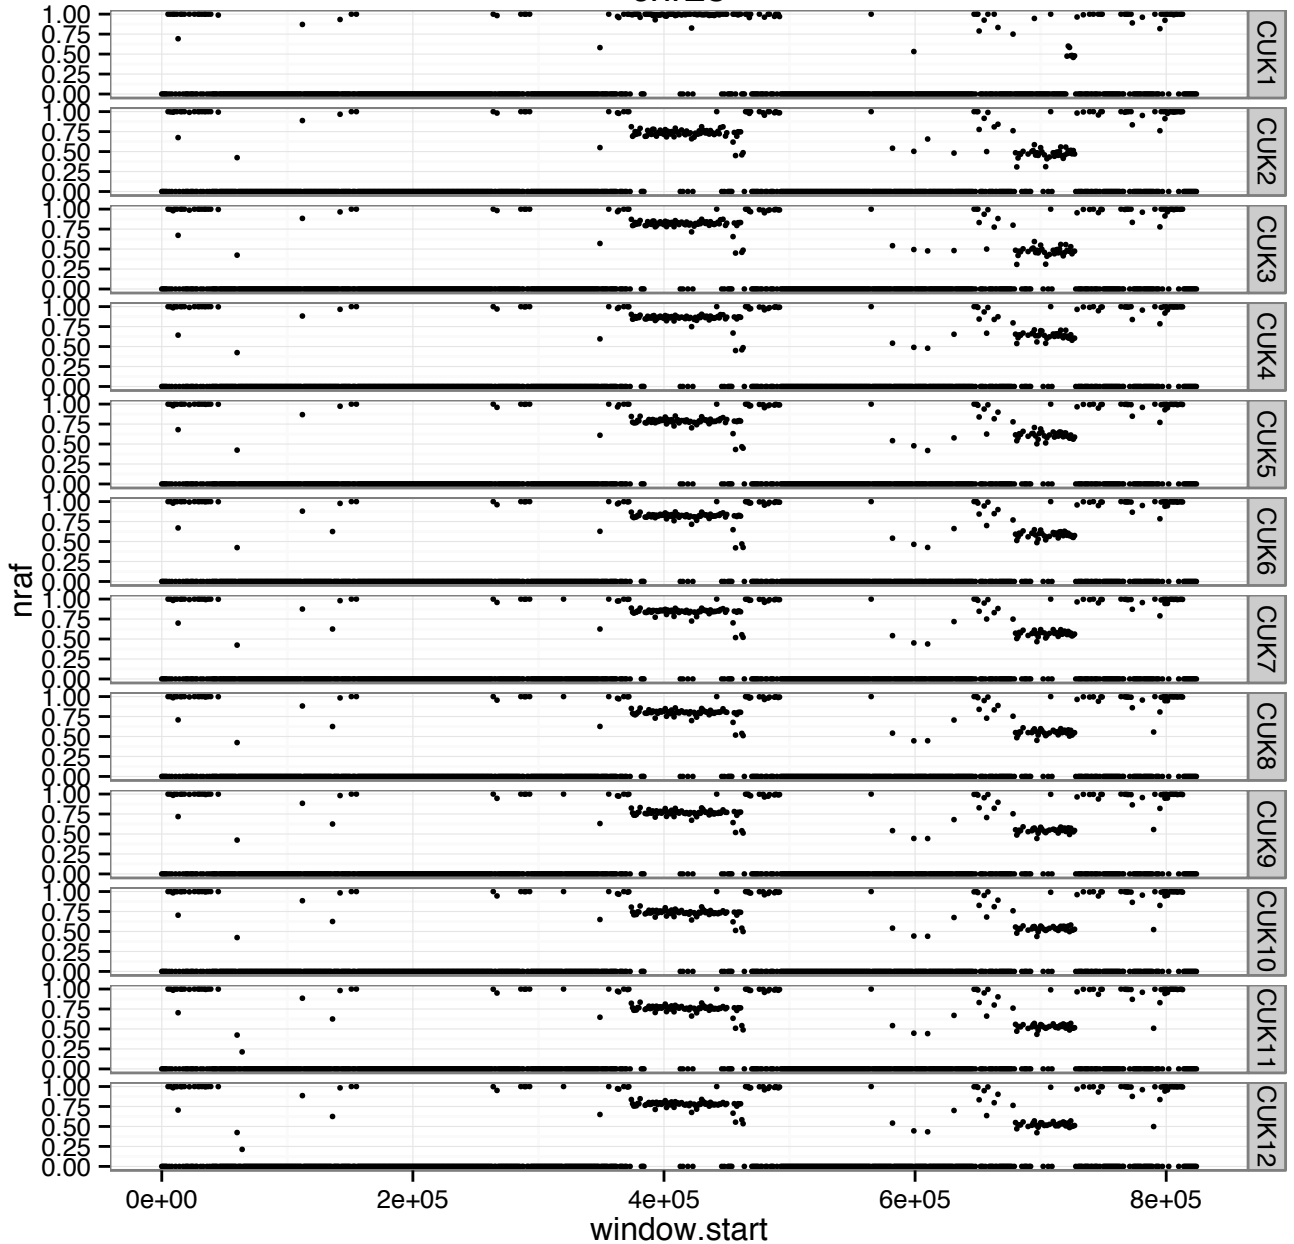

# chr29

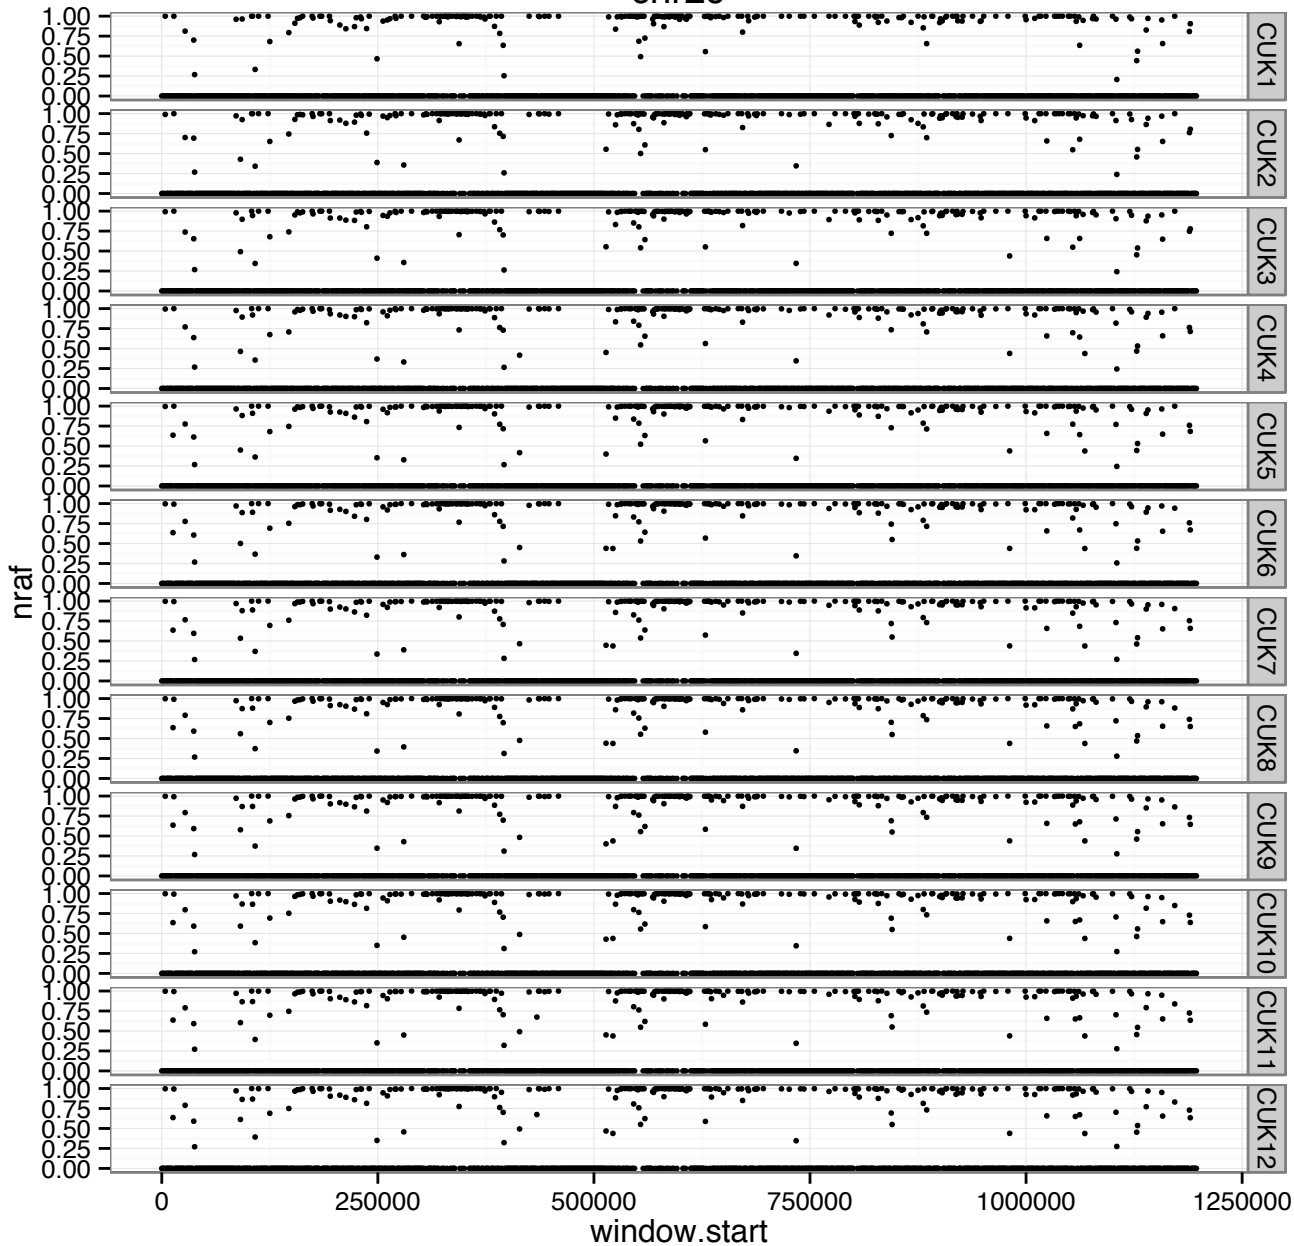

# chr30

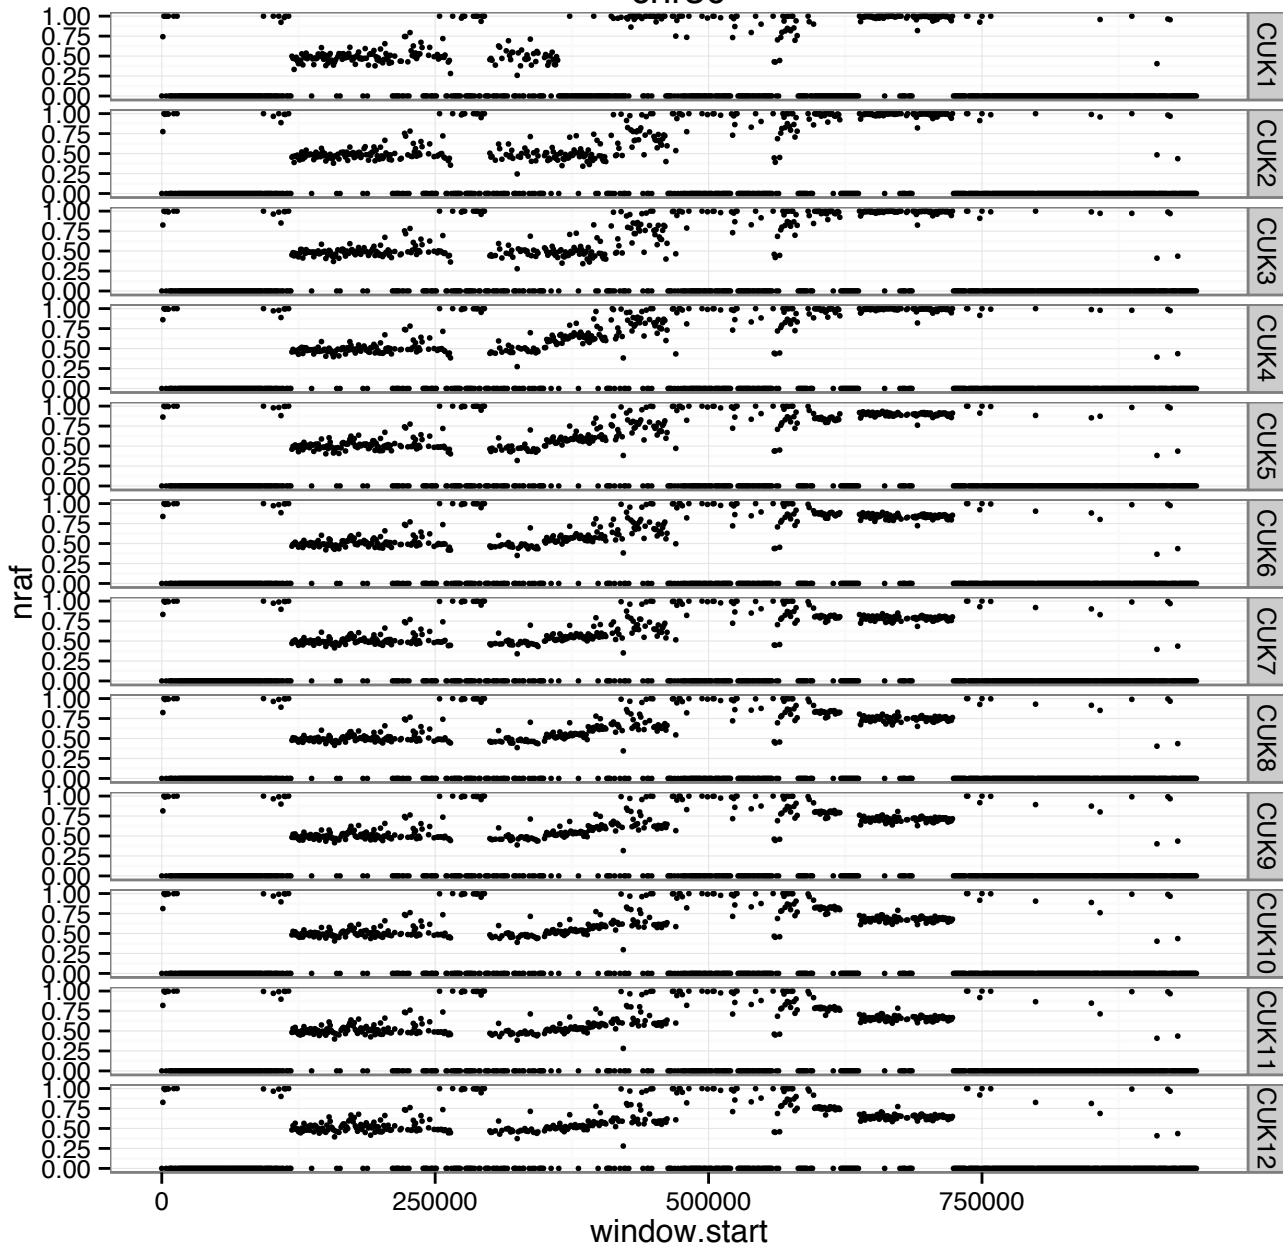

# chr31

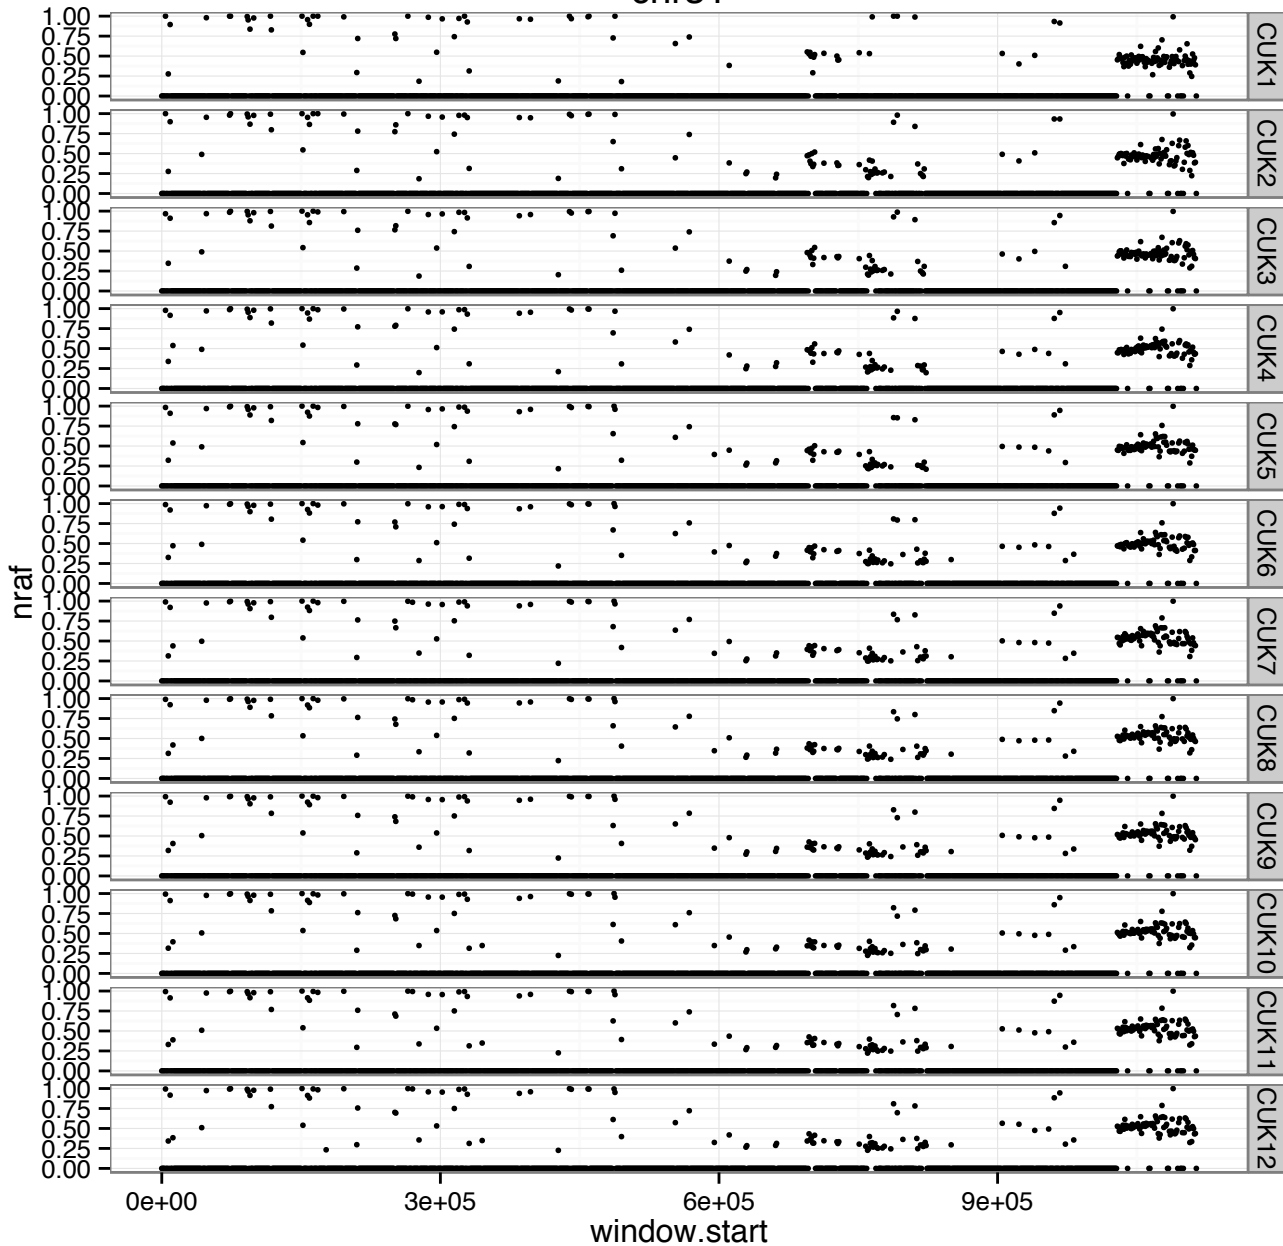

chr32

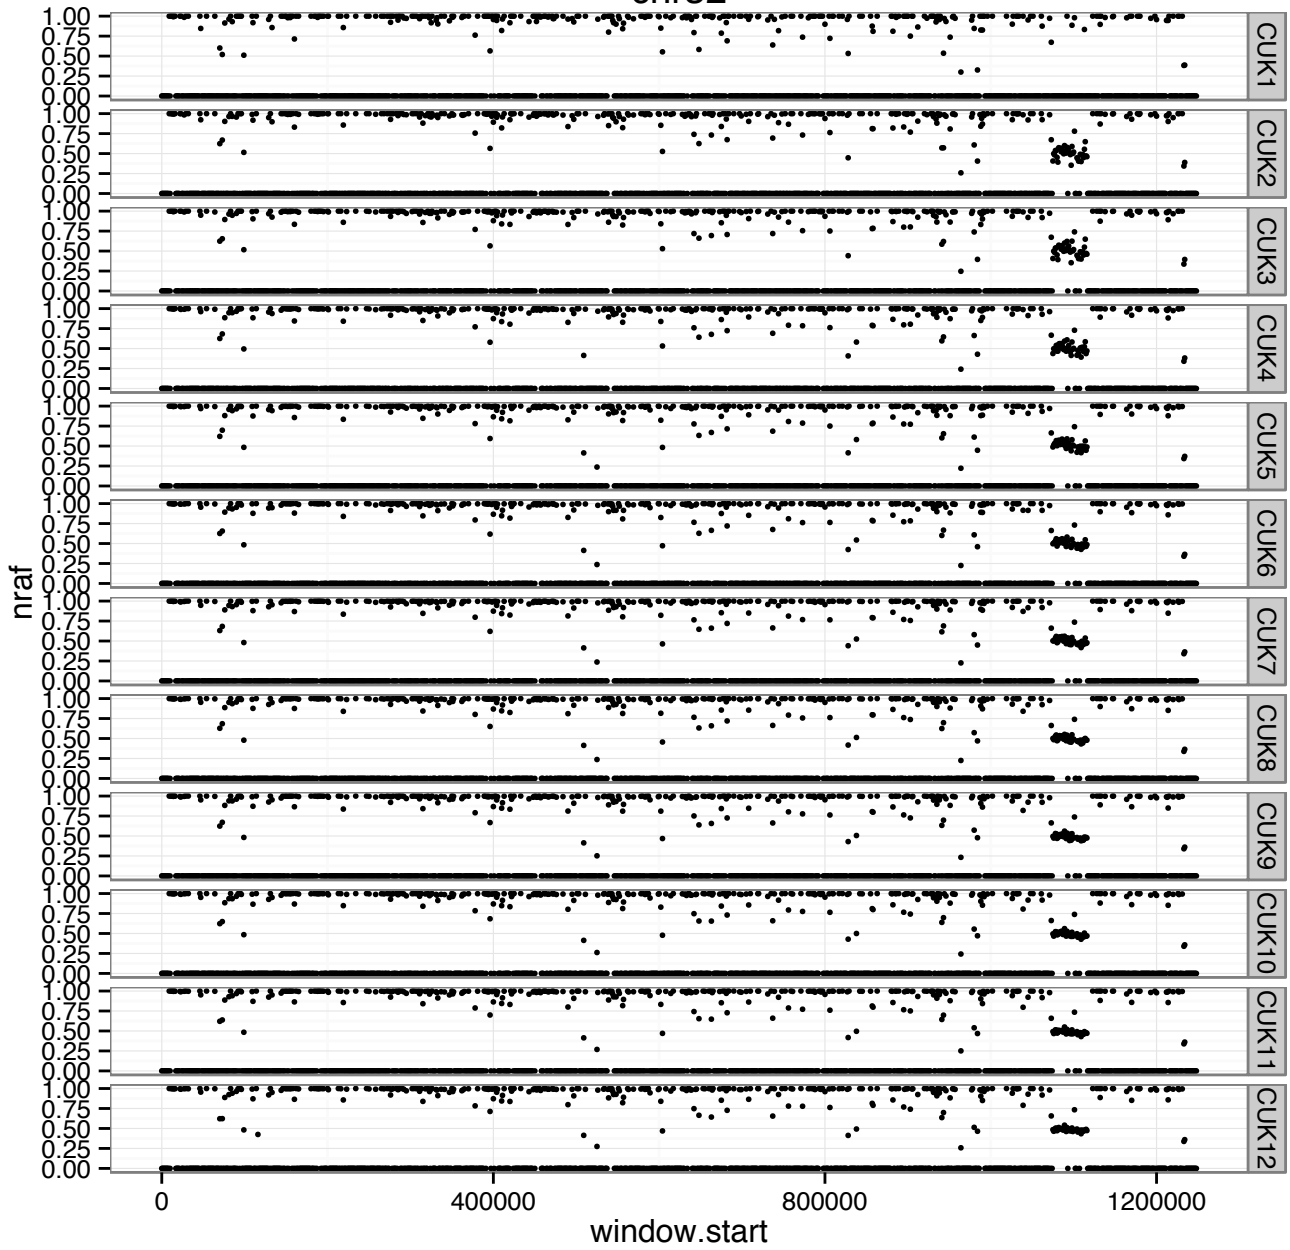



chr33

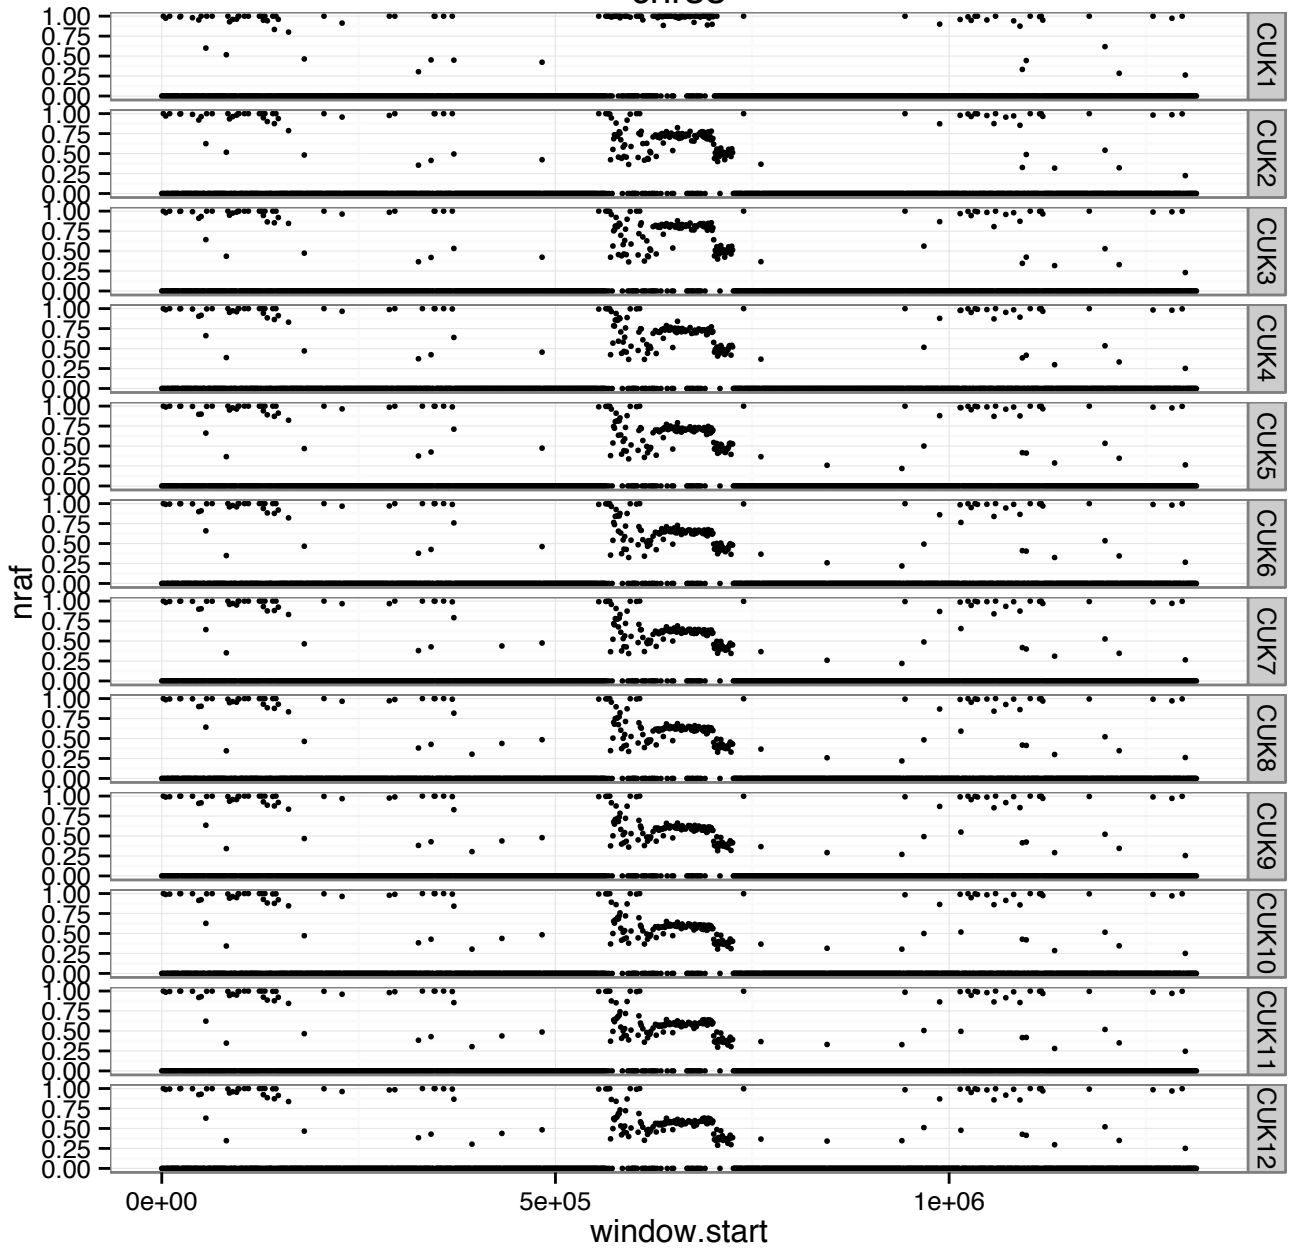

chr34

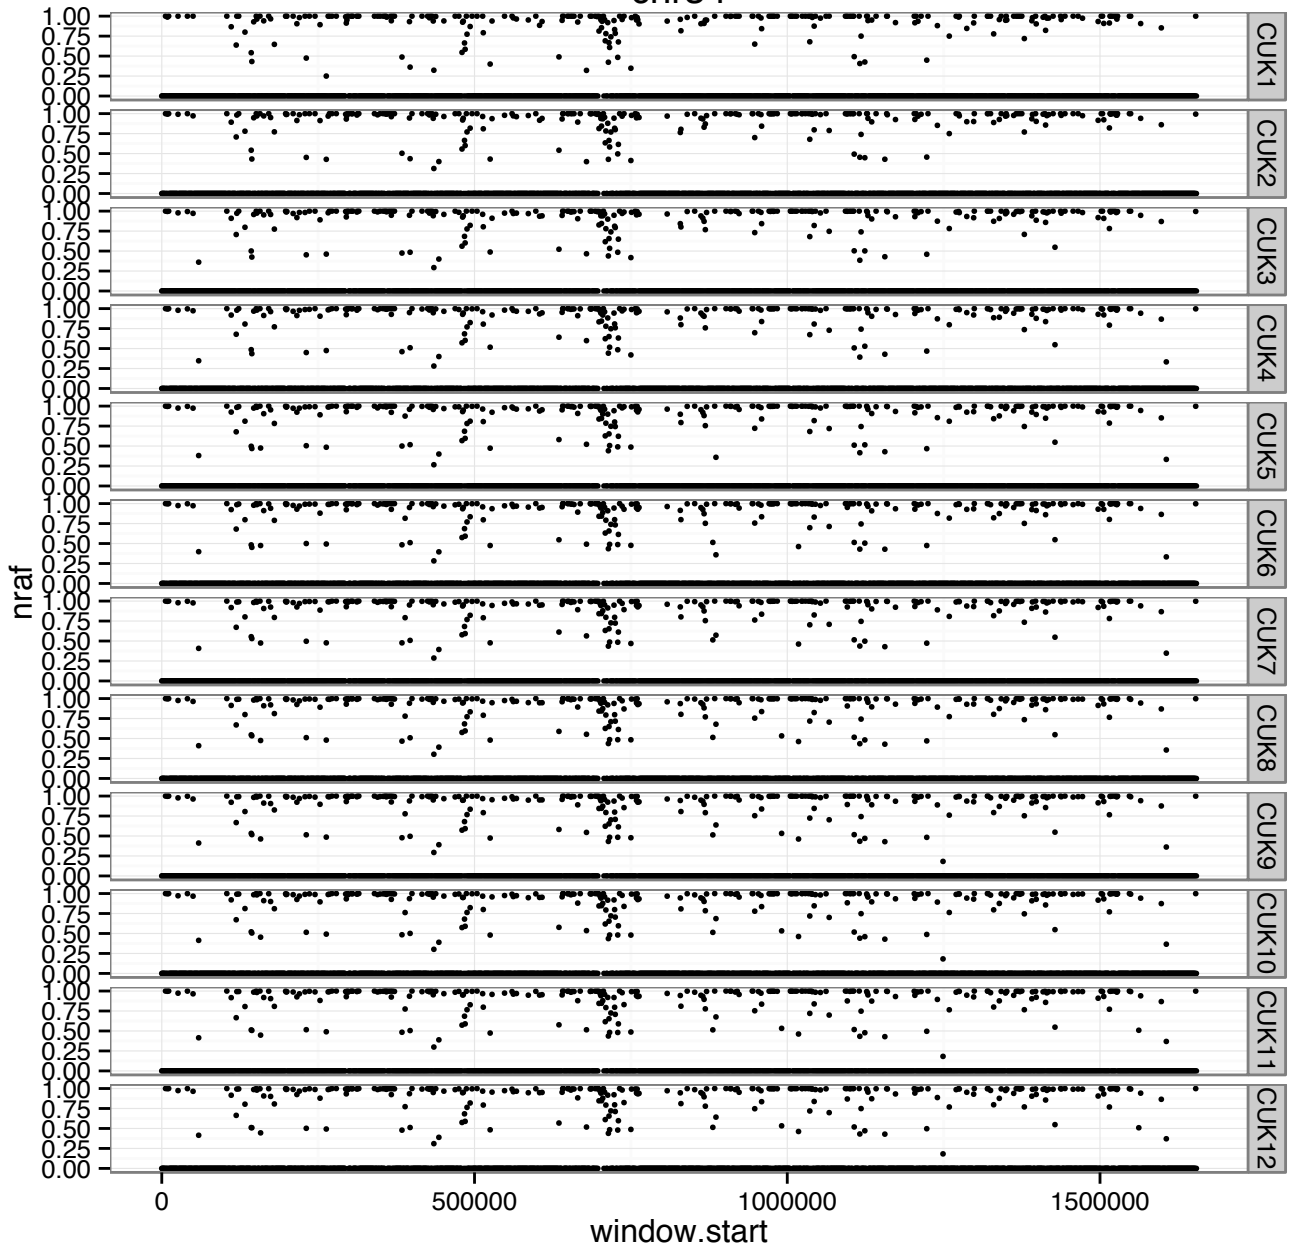

chr35

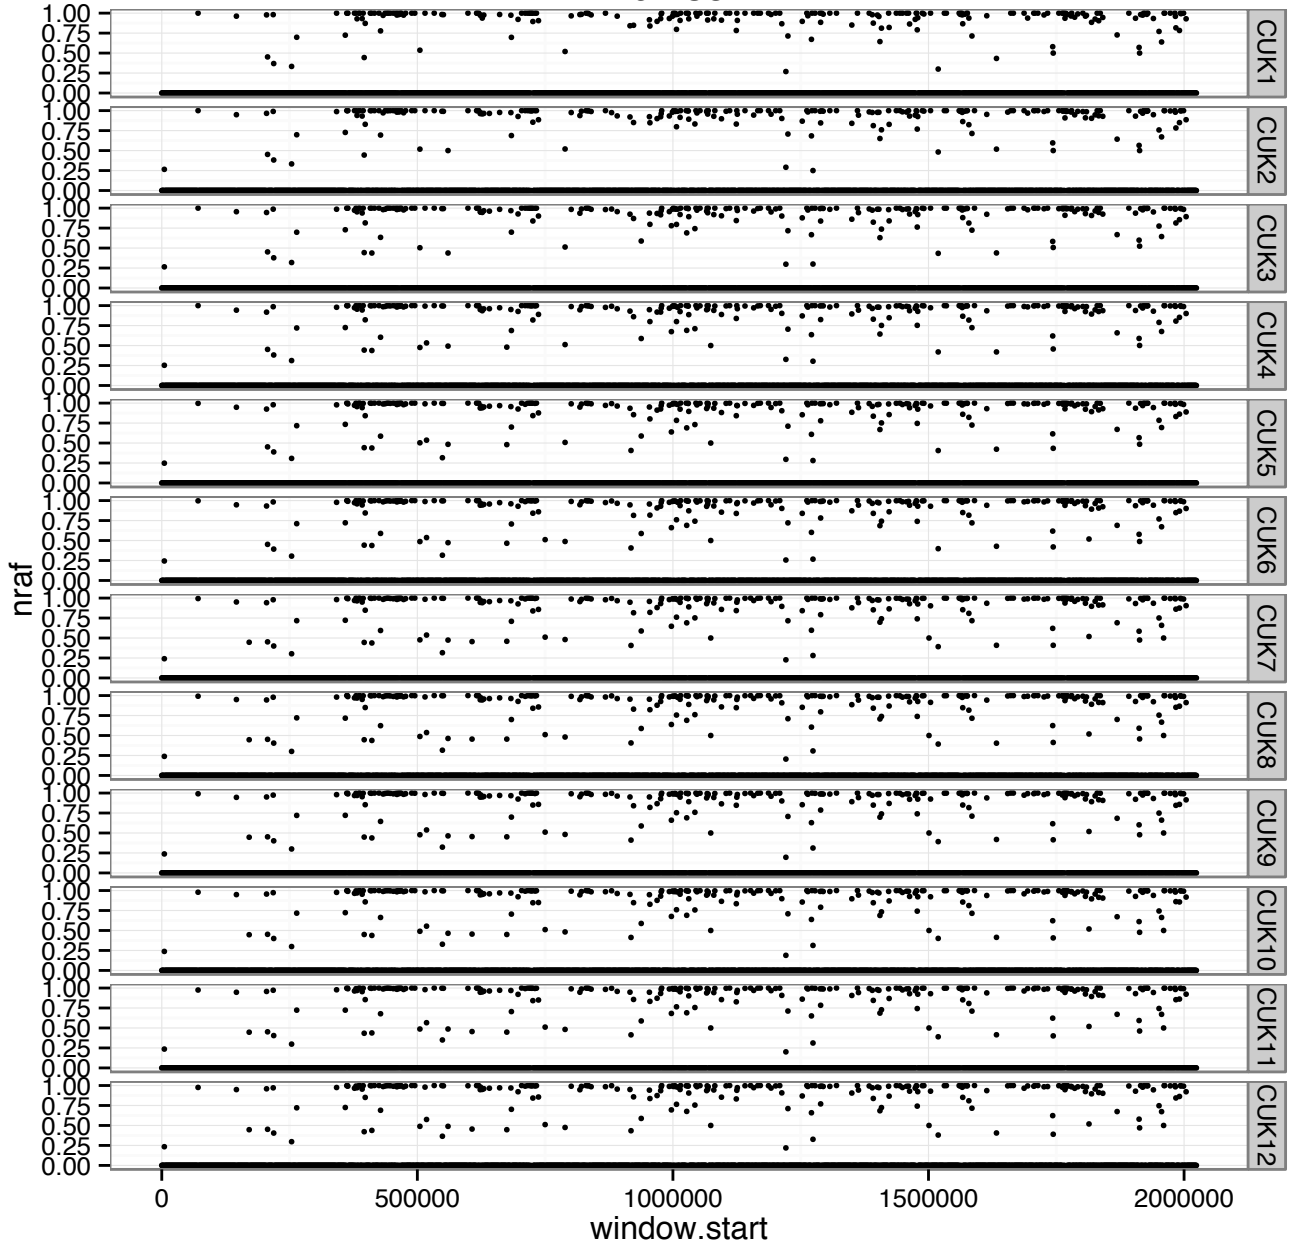

chr36

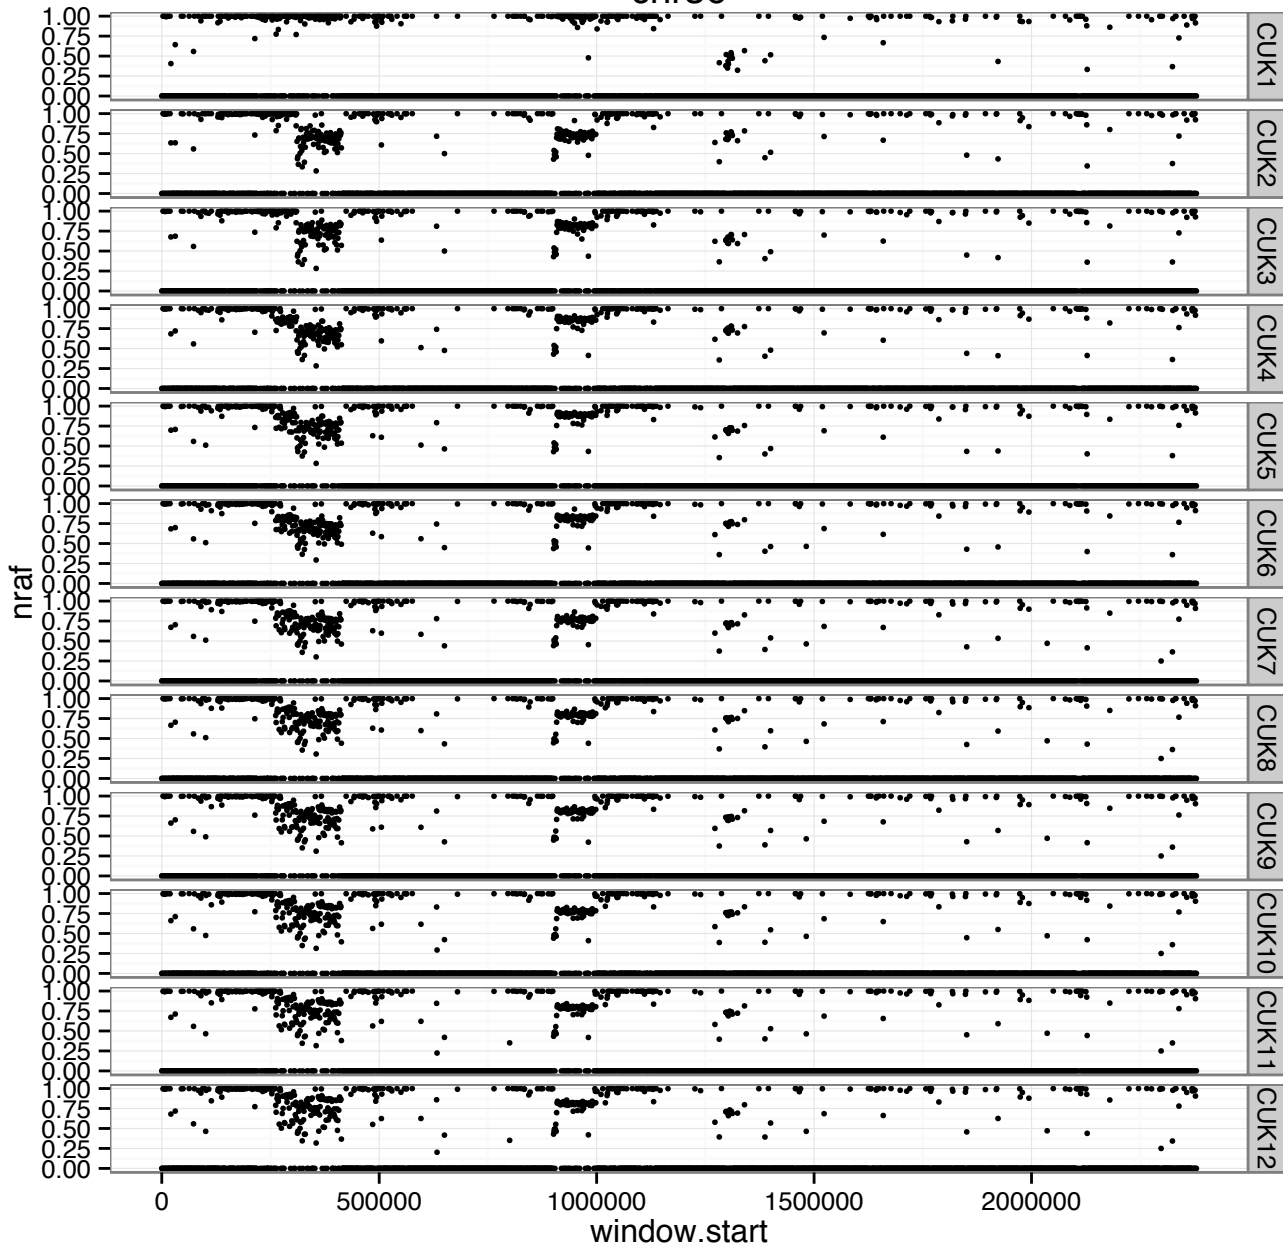

Supplement: pgen.1004092.s005.pdf [file pgen.1004092.s005.pdf]
