# Supplementary material for: Genomic Confirmation of Hybridisation and Recent Inbreeding in a Vector-Isolated Leishmania Population
Source: PubMed Central journal article supplement (PMC3894156; doi:10.1371/journal.pgen.1004092), 2014-01-16

LinJ.22:517430-523241

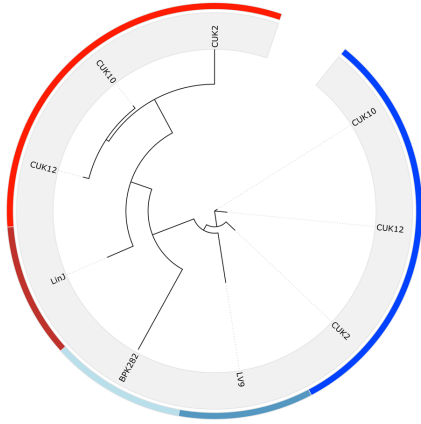

LinJ.22:560728-566558

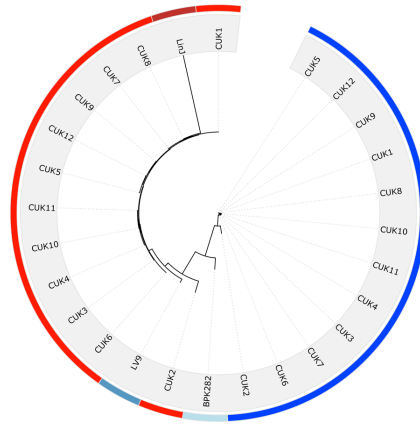

LinJ.22:569430-574457

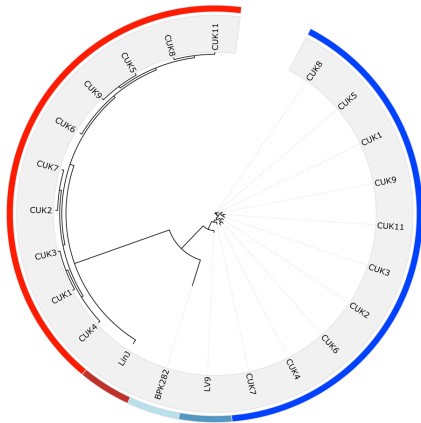

LinJ.23:487317-494203

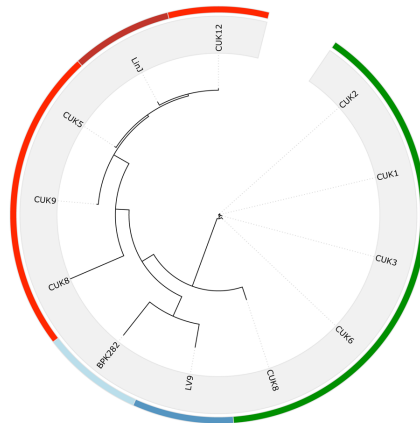

LinJ.24:166522-170956

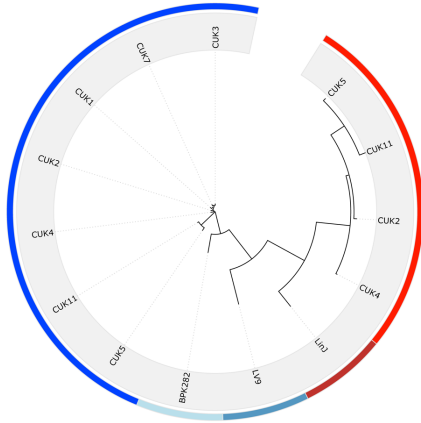

LinJ.24:283189-291818

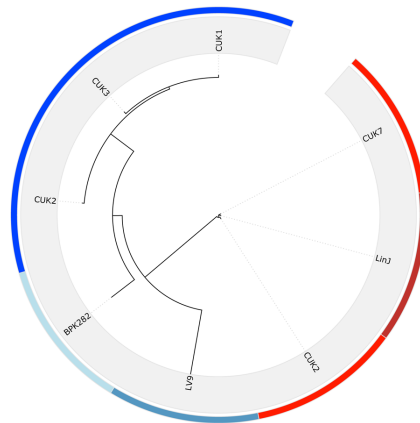







LinJ.30:147138-152234

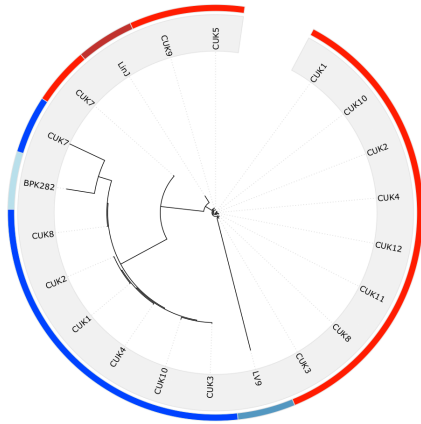

LinJ.30:192738-199344

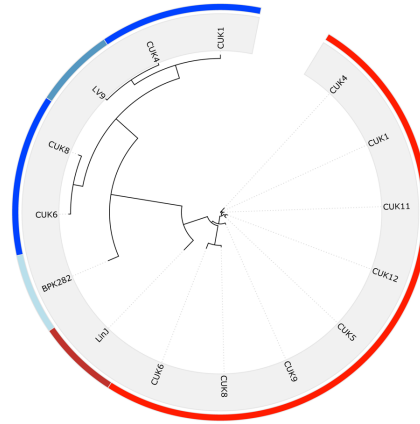

LinJ.30:229882-233565

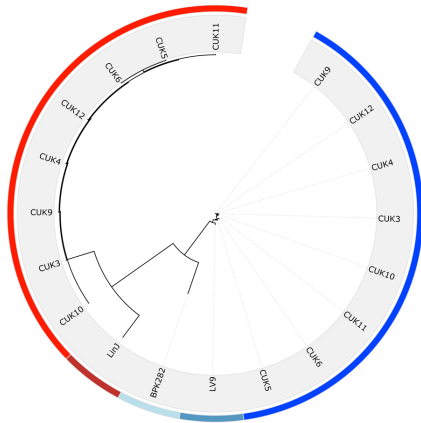

LinJ.30:253015-258382

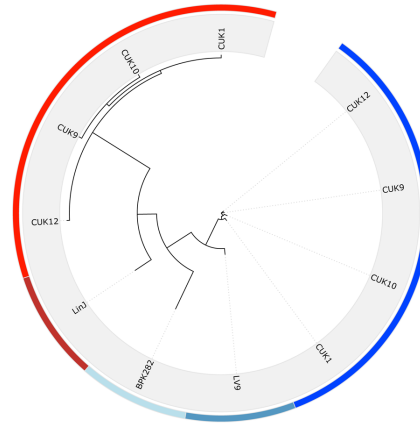

LinJ.30:348662-354563

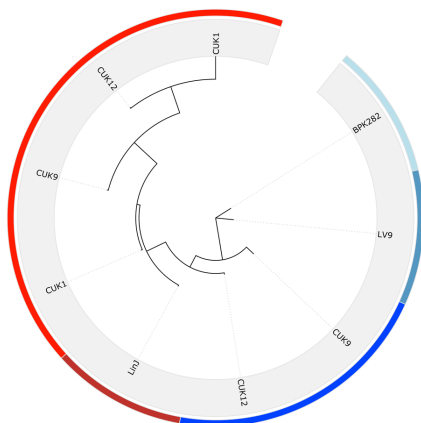

LinJ.30:449969-455055

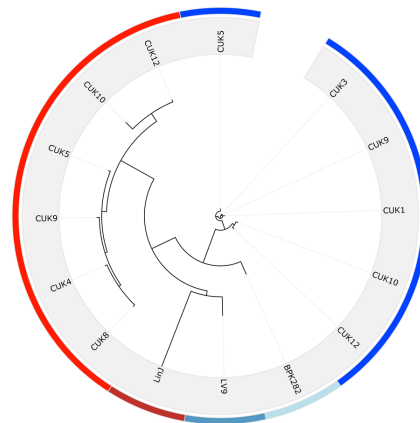

LinJ.30:596044-610110

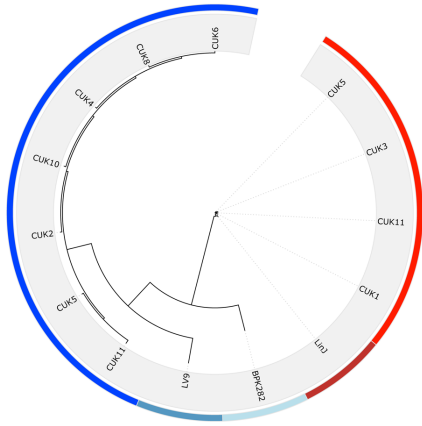

LinJ.30:708341-716284

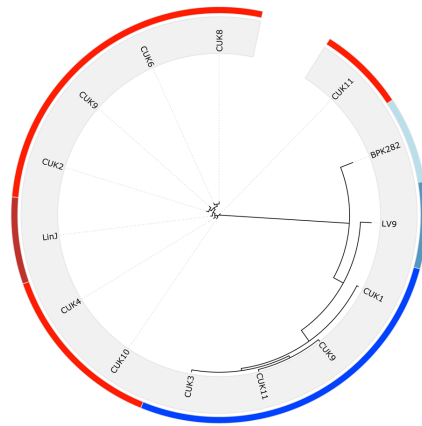

LinJ.31:762603-767918

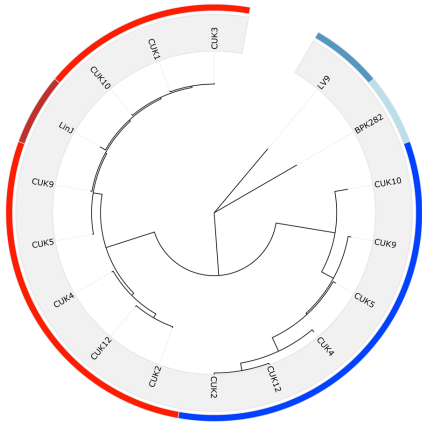

LinJ.31:1049672-1052348

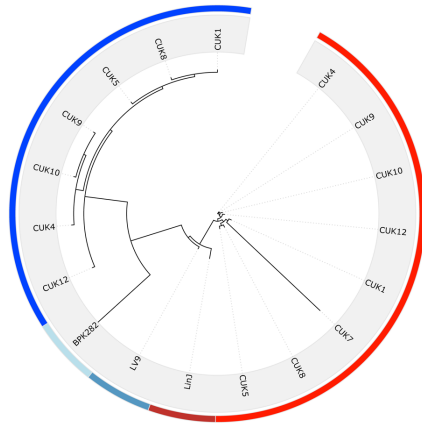

LinJ.31:1104988-1110043

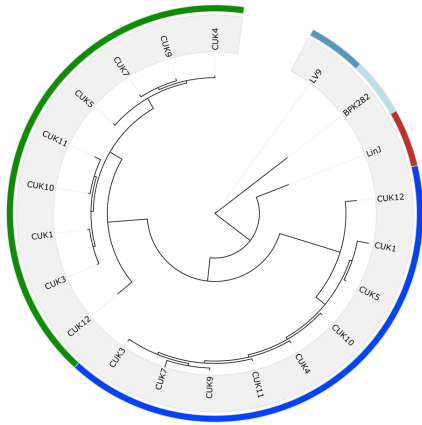

LinJ.31:1120603-1125945

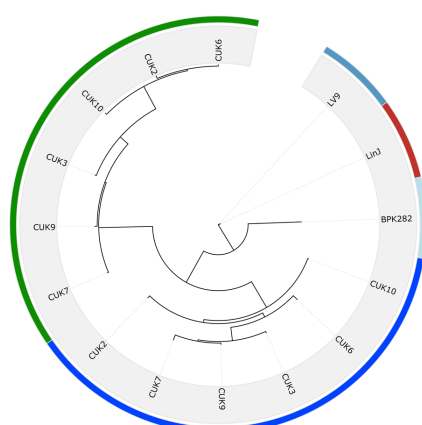









LinJ.30:338617-344387

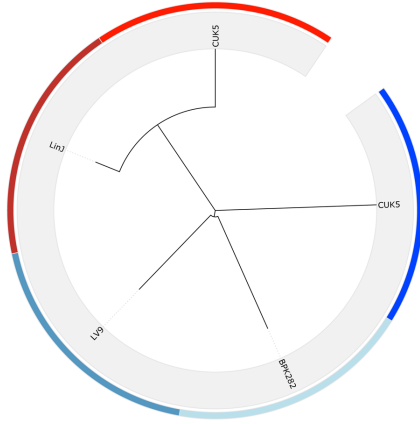

LinJ.30:694274-704362

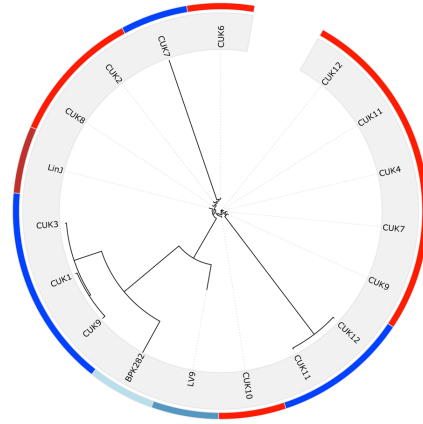

LinJ.31:1030268-1036249

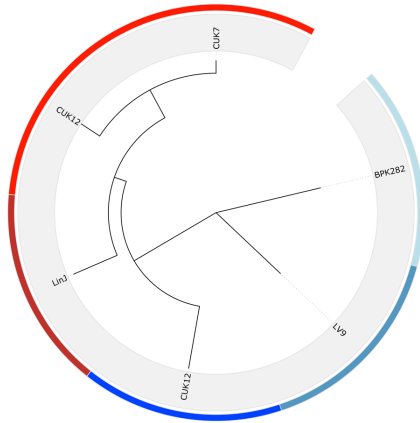

LinJ.31:1076440-1081476

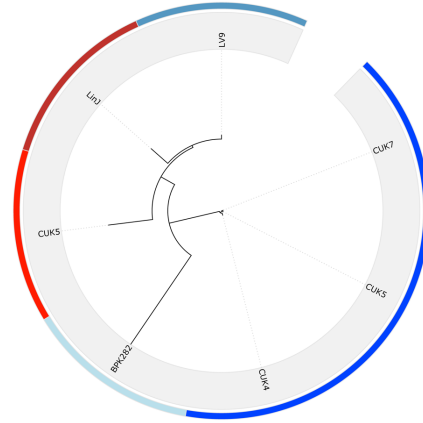

LinJ.36:325472-330802

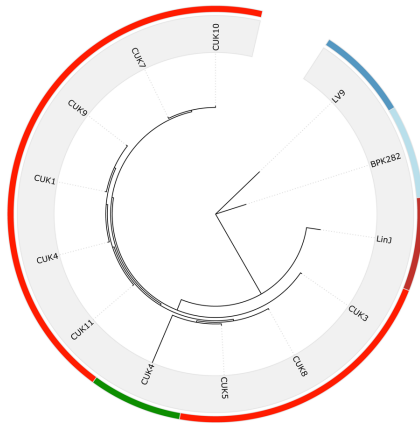

LinJ.36:353451-358936

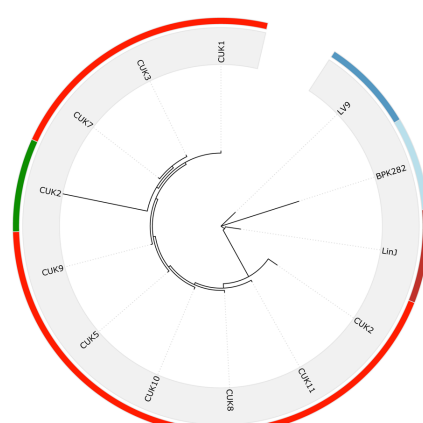



LinJ.36:381464-388903

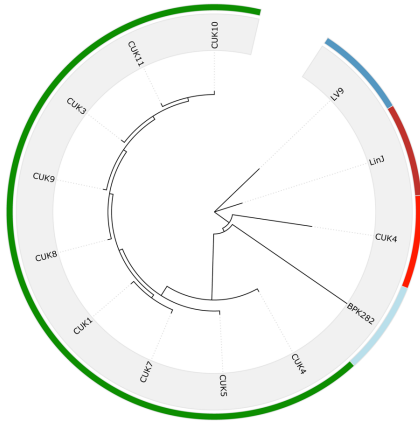

LinJ.24:128176-133206

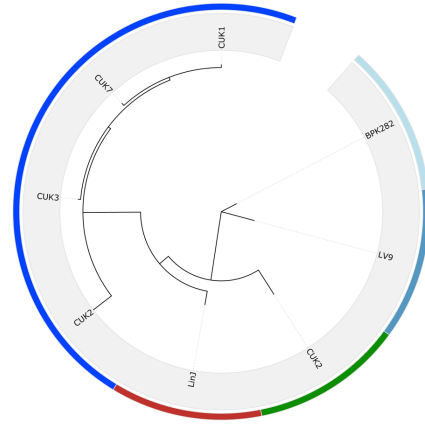

Supplement: pgen.1004092.s008.pdf [file pgen.1004092.s008.pdf]
