# Supplementary material for: Genomic Confirmation of Hybridisation and Recent Inbreeding in a Vector-Isolated Leishmania Population
Source: PubMed Central journal article supplement (PMC3894156; doi:10.1371/journal.pgen.1004092), 2014-01-16

0.1

MCAN/ES/98/LLM877-JPCM5

Spain

Turkey

MHOM/NP/03/BPK282/0c14

Nepal

MHOM/ET/67/LV9-HU3

Ethiopia

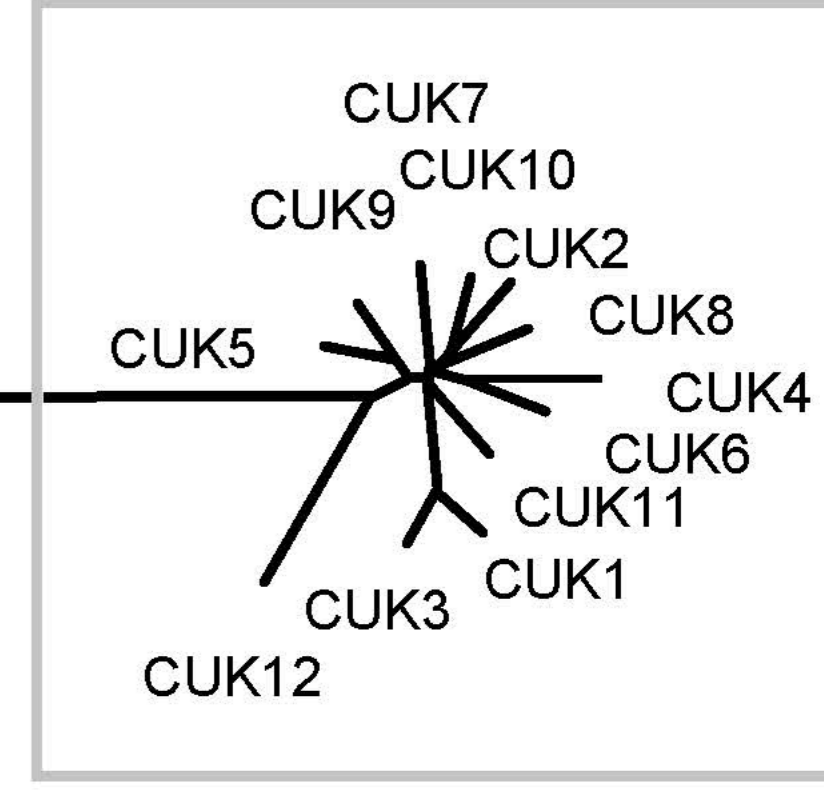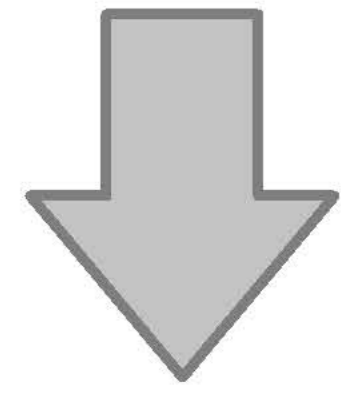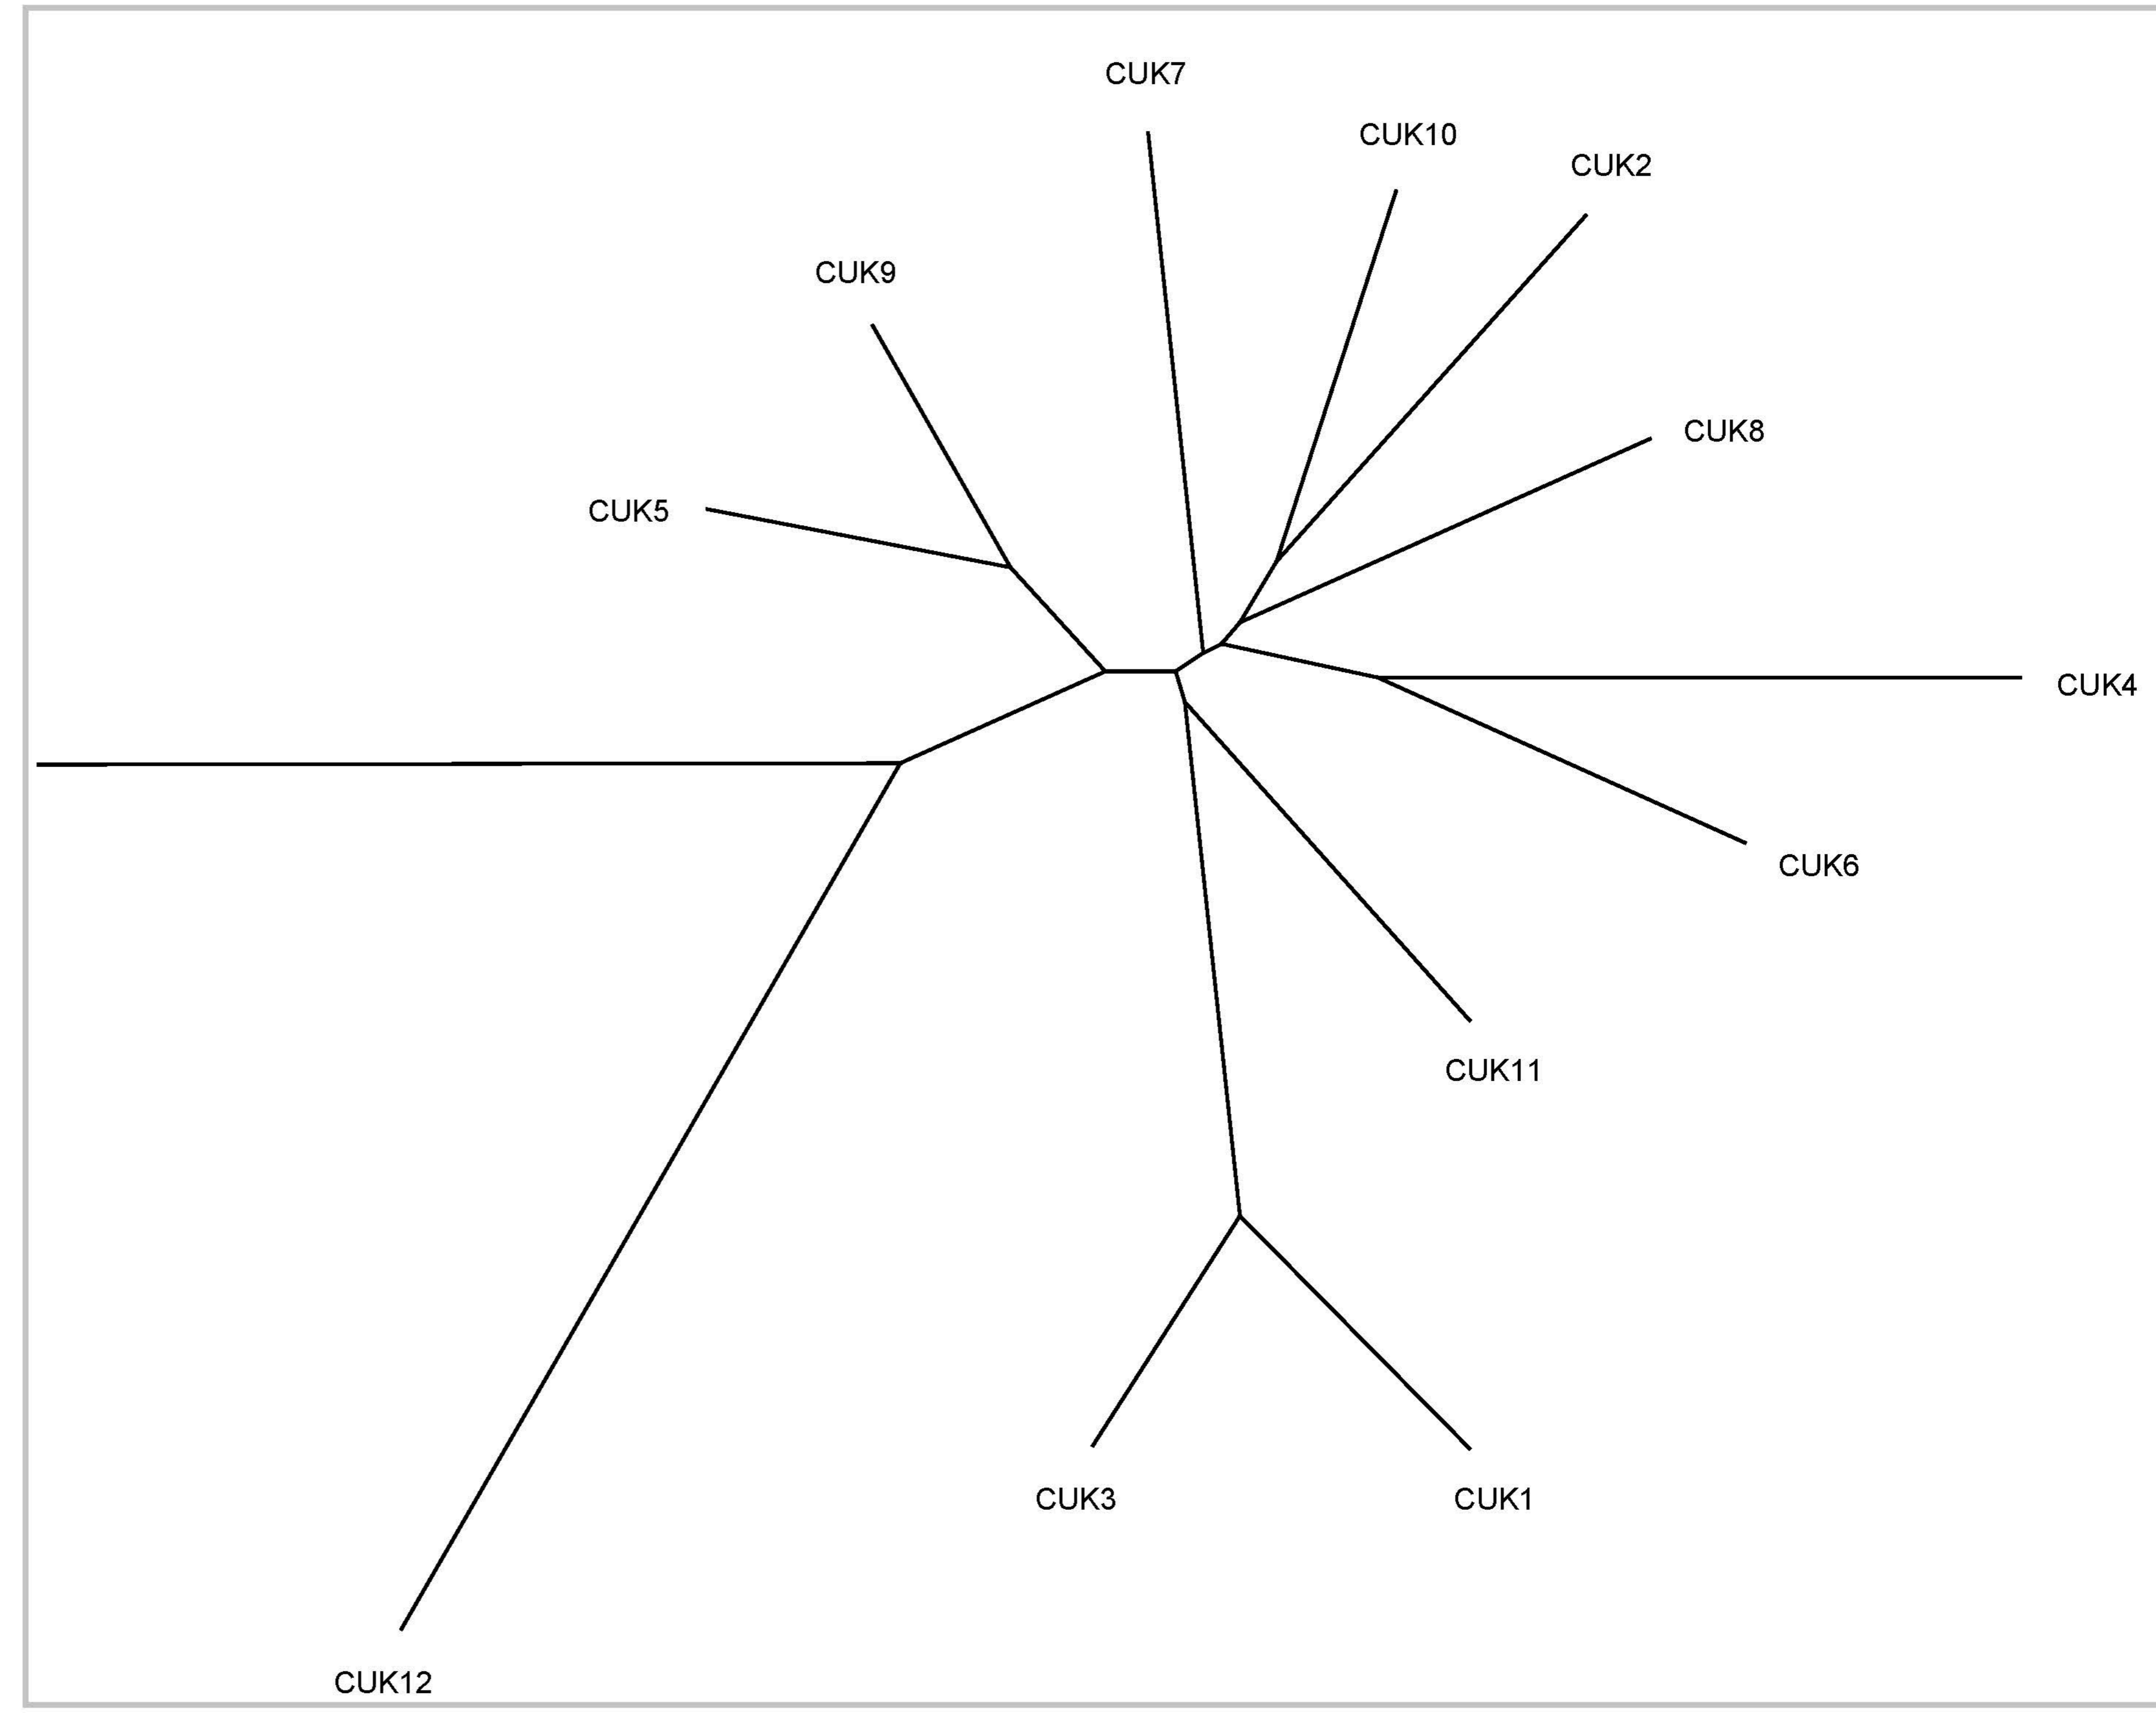

Supplement: pgen.1004092.s002.pdf [file pgen.1004092.s002.pdf]
