# Supplementary material for: Genomic Confirmation of Hybridisation and Recent Inbreeding in a Vector-Isolated Leishmania Population
Source: PubMed Central journal article supplement (PMC3894156; doi:10.1371/journal.pgen.1004092), 2014-01-16

# Chromosome (10kb blocks)

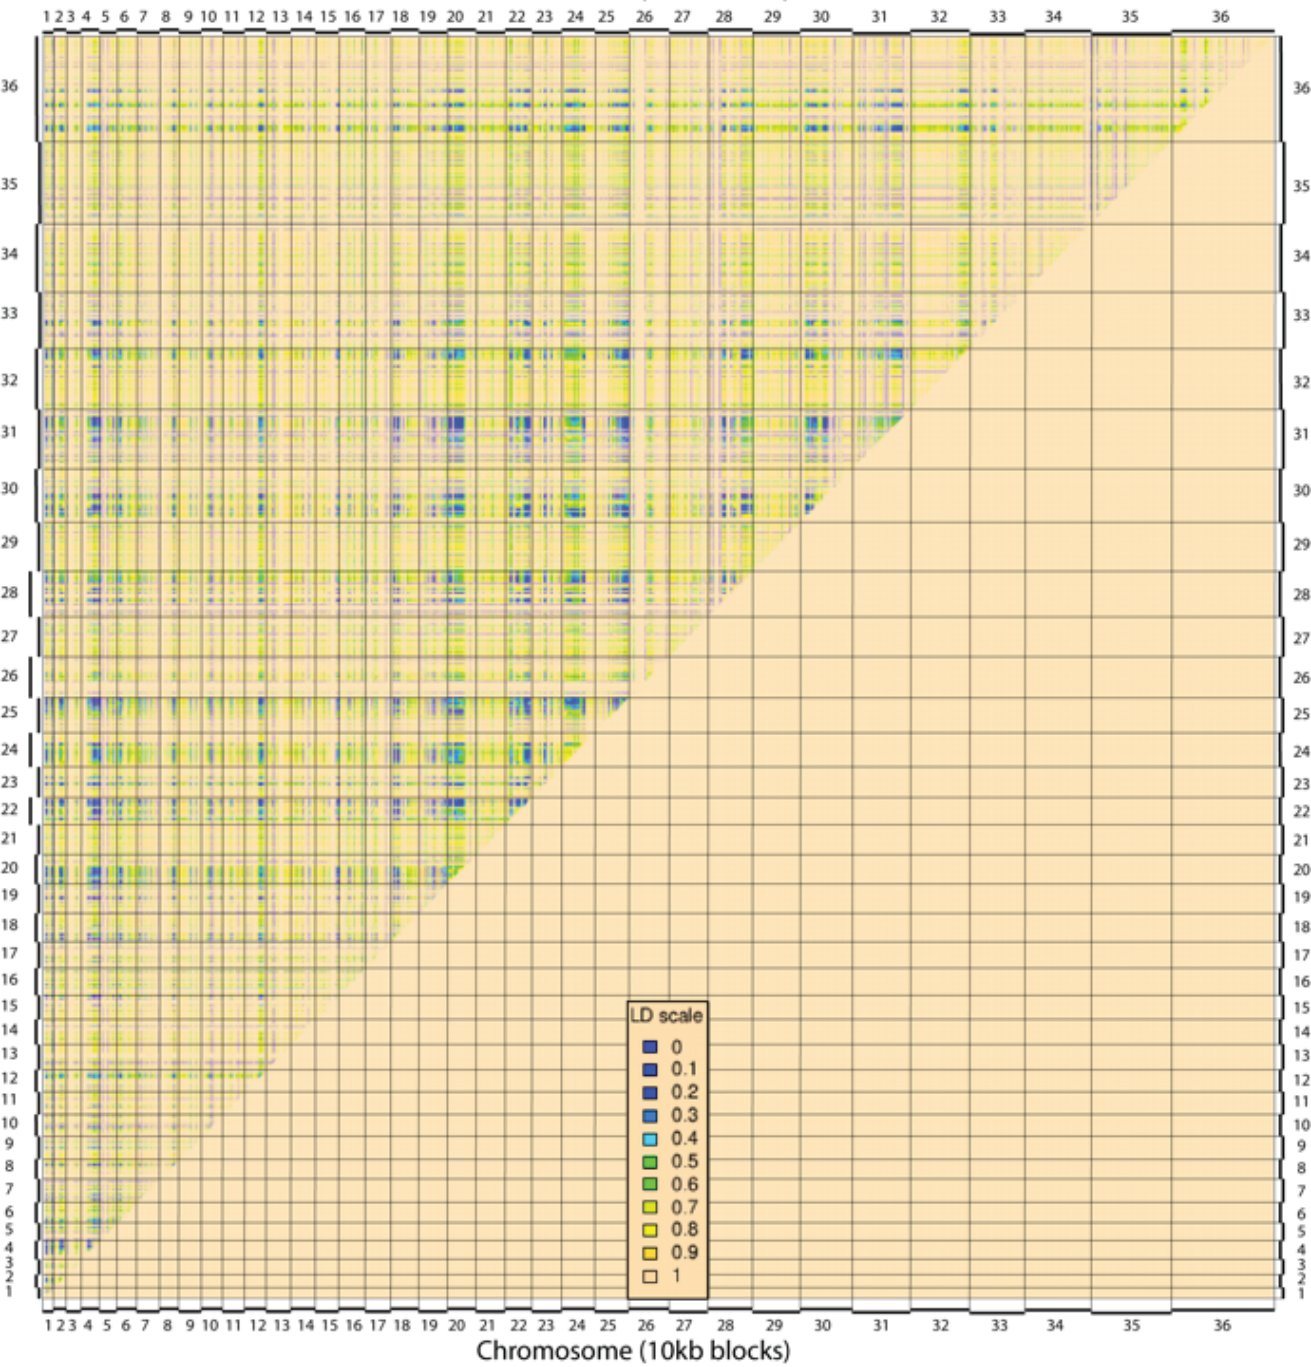

Supplement: pgen.1004092.s012.pdf [file pgen.1004092.s012.pdf]
