# Supplementary material for: Genomic Confirmation of Hybridisation and Recent Inbreeding in a Vector-Isolated Leishmania Population
Source: PubMed Central journal article supplement (PMC3894156; doi:10.1371/journal.pgen.1004092), 2014-01-16
Supplement: pgen.1004092.s018.pdf [file pgen.1004092.s018.pdf]

**Table S1.** Source of the CUK strains analysed in this study.

| WHO code/name              | Origin                     | Locality                | Coordinates               | Date of isolation | Accession number for sequence data |
|----------------------------|----------------------------|-------------------------|---------------------------|-------------------|------------------------------------|
| MHOM/TR/2005/HUM1 (CUK1)   | human isolate (male 27 yr) | Tepecikören/<br>Zerdali | 37°21'51"N,<br>35°37'39"E | 23.9. 2005        | ERS026255                          |
| ITOB/TR/2005/TOB1 (CUK2)   | <i>Phlebotomus tobbi</i>   | Zerdali,<br>house Y     | 37°25'57"N,<br>35°37'17"E | 23.9. 2005        | ERS026256                          |
| ITOB/TR/2005/TOB2 (CUK3)   | <i>Phlebotomus tobbi</i>   | Otluk,<br>house G       | 37°18'2"N,<br>35°31'7"E   | 26.9. 2005        | ERS026257                          |
| ITOB/TR/2006/TOB4 (CUK4)   | <i>Phlebotomus tobbi</i>   | Pirsuntanli,<br>house S | 37°17'40"N,<br>36°19'12"E | 19.9. 2006        | ERS026258                          |
| ITOB/TR/2006/TOB5 (CUK5)   | <i>Phlebotomus tobbi</i>   | Boyalı,<br>house K      | 37°17'50"N,<br>36°21'39"E | 19.9. 2006        | ERS026259                          |
| ITOB/TR/2006/TOB6 (CUK6)   | <i>Phlebotomus tobbi</i>   | Pirsuntanli,<br>house S | 37°17'40"N,<br>36°19'12"E | 19.9. 2006        | ERS026260                          |
| ITOB/TR/2006/TOB7 (CUK7)   | <i>Phlebotomus tobbi</i>   | Pirsuntanli,<br>house S | 37°17'40"N,<br>36°19'12"E | 19.9. 2006        | ERS026261                          |
| ITOB/TR/2006/TOB8 (CUK8)   | <i>Phlebotomus tobbi</i>   | Boyalı,<br>house K      | 37°17'50"N,<br>36°21'39"E | 16.9. 2006        | ERS026262                          |
| ITOB/TR/2007/TOB9 (CUK9)   | <i>Phlebotomus tobbi</i>   | Bayandırli,<br>house B  | 37°18'41"N,<br>36°22'51"E | 25.9. 2007        | ERS026263                          |
| ITOB/TR/2007/TOB10 (CUK10) | <i>Phlebotomus tobbi</i>   | Bayandırli,<br>house A  | 37°18'41"N,<br>36°22'51"E | 25.9. 2007        | ERS026264                          |
| ITOB/TR/2007/TOB11 (CUK11) | <i>Phlebotomus tobbi</i>   | Bayandırli,<br>house A  | 37°18'41"N,<br>36°22'51"E | 25.9. 2007        | ERS026265                          |
| ITOB/TR/2007/TOB12 (CUK12) | <i>Phlebotomus tobbi</i>   | Bayandırli<br>house A   | 37°18'41"N,<br>36°22'51"E | 25.9. 2007        | ERS026266                          |

Data are provided on the WHO code, source (vector or host), geographical location and coordinates, date of isolation and sequence data for each strain used; these are referred to as the CUK strains (1-12) throughout. Accession numbers are for the sequence read data in the European Nucleotide Archive (ENA). Data for all 12 isolates can be obtained via study ERP000588 (<http://www.ebi.ac.uk/ena/data/view/ERP000588>).
