# Supplementary material for: Genomic Confirmation of Hybridisation and Recent Inbreeding in a Vector-Isolated Leishmania Population
Source: PubMed Central journal article supplement (PMC3894156; doi:10.1371/journal.pgen.1004092), 2014-01-16
Supplement: pgen.1004092.s019.pdf [file pgen.1004092.s019.pdf]

**Table S2.** Genome-wide read-mapping coverage levels for the 12 CUK strains relative to the *L. infantum* (A) and *L. donovani* (B) reference genomes.

| Strain | Total #sites | Coverage |        |
|--------|--------------|----------|--------|
|        |              | Mean     | Median |
| CUK1   | 31,477,655   | 51.8     | 50     |
| CUK2   | 31,470,599   | 50.1     | 49     |
| CUK3   | 31,465,185   | 49.8     | 49     |
| CUK4   | 31,487,776   | 57.5     | 56     |
| CUK5   | 31,469,622   | 48.6     | 47     |
| CUK6   | 31,458,190   | 44.1     | 43     |
| CUK7   | 31,464,764   | 44.5     | 43     |
| CUK8   | 31,452,421   | 48.0     | 47     |
| CUK9   | 31,477,028   | 52.1     | 51     |
| CUK10  | 31,317,674   | 38.3     | 38     |
| CUK11  | 31,459,366   | 45.5     | 45     |
| CUK12  | 31,496,928   | 64.7     | 63     |

(A) Illumina Hiseq 2000 76bp reads were mapping with Smalt v0.6.1 ([www.sanger.ac.uk/resources/software/smalt/](http://www.sanger.ac.uk/resources/software/smalt/)) to the *L. infantum* reference genome JPCM5 (Rogers et al. 2011) for all chromosomes; those mapping to non-chromosomal contigs and kDNA regions are not shown.

| Strain | Total #sites | Coverage |        |
|--------|--------------|----------|--------|
|        |              | Mean     | Median |
| CUK1   | 31,157,536   | 39.4     | 38     |
| CUK2   | 31,158,746   | 46.5     | 45     |
| CUK3   | 31,166,501   | 66.2     | 63     |
| CUK4   | 31,162,767   | 53.0     | 50     |
| CUK5   | 31,161,969   | 51.2     | 49     |
| CUK6   | 31,162,099   | 51.0     | 49     |
| CUK7   | 31,166,594   | 58.9     | 57     |
| CUK8   | 31,161,902   | 49.7     | 48     |
| CUK9   | 31,156,791   | 45.2     | 43     |
| CUK10  | 31,159,872   | 45.5     | 43     |
| CUK11  | 31,159,513   | 49.1     | 47     |
| CUK12  | 31,165,994   | 53.3     | 51     |

(B) The same reads mapped to the *L. donovani* reference genome BPK282/0c14 (Downing et al. 2011).
