# Supplementary material for: Genomic Confirmation of Hybridisation and Recent Inbreeding in a Vector-Isolated Leishmania Population
Source: PubMed Central journal article supplement (PMC3894156; doi:10.1371/journal.pgen.1004092), 2014-01-16
Supplement: pgen.1004092.s020.pdf [file pgen.1004092.s020.pdf]

**Table S3.** Numbers of variable sites in each CUK strain.

| Strain | SNPs   | Homozygous | Heterozygous |
|--------|--------|------------|--------------|
| CUK1   | 11,091 | 7,857      | 3,234        |
| CUK2   | 11,979 | 5,410      | 6,569        |
| CUK3   | 10,961 | 7,668      | 3,293        |
| CUK4   | 13,008 | 6,306      | 6,702        |
| CUK5   | 11,797 | 6,641      | 5,156        |
| CUK6   | 12,246 | 6,413      | 5,833        |
| CUK7   | 11,515 | 5,119      | 6,396        |
| CUK8   | 11,911 | 5,872      | 6,039        |
| CUK9   | 11,208 | 5,354      | 5,854        |
| CUK10  | 11,262 | 4,890      | 6,372        |
| CUK11  | 11,937 | 6,397      | 5,540        |
| CUK12  | 12,106 | 6,940      | 5,166        |

SNPs were called using the *L. infantum* JPCM5 reference genome: heterozygous alleles were determined using read depth coverage and quality metrics.
