# Supplementary material for: Genomic Confirmation of Hybridisation and Recent Inbreeding in a Vector-Isolated Leishmania Population
Source: PubMed Central journal article supplement (PMC3894156; doi:10.1371/journal.pgen.1004092), 2014-01-16
Supplement: pgen.1004092.s021.pdf [file pgen.1004092.s021.pdf]

**Table S4.** The number of pair-wise differences between the CUK strains.

| SNPs  | CUK1  | CUK2  | CUK3  | CUK4  | CUK5  | CUK6  | CUK7  | CUK8  | CUK9  | CUK10 | CUK11 | CUK12 |
|-------|-------|-------|-------|-------|-------|-------|-------|-------|-------|-------|-------|-------|
| CUK1  |       |       |       |       |       |       |       |       |       |       |       |       |
| CUK2  | 6,329 |       |       |       |       |       |       |       |       |       |       |       |
| CUK3  | 2,012 | 6,149 |       |       |       |       |       |       |       |       |       |       |
| CUK4  | 5,792 | 4,289 | 5,802 |       |       |       |       |       |       |       |       |       |
| CUK5  | 5,527 | 5,834 | 5,463 | 5,165 |       |       |       |       |       |       |       |       |
| CUK6  | 6,165 | 4,730 | 6,113 | 3,549 | 5,064 |       |       |       |       |       |       |       |
| CUK7  | 5,657 | 5,086 | 5,563 | 4,871 | 5,102 | 4,986 |       |       |       |       |       |       |
| CUK8  | 5,659 | 4,572 | 5,607 | 4,821 | 4,876 | 4,504 | 5,242 |       |       |       |       |       |
| CUK9  | 5,579 | 5,960 | 5,527 | 5,467 | 2,924 | 5,074 | 5,582 | 4,844 |       |       |       |       |
| CUK10 | 5,691 | 4,380 | 5,531 | 4,461 | 5,012 | 4,446 | 4,902 | 3,678 | 4,992 |       |       |       |
| CUK11 | 5,168 | 5,253 | 5,048 | 4,954 | 3,589 | 4,903 | 4,919 | 4,343 | 3,941 | 4,783 |       |       |
| CUK12 | 5,517 | 5,704 | 5,439 | 5,117 | 2,424 | 5,214 | 4,768 | 4,988 | 2,884 | 5,032 | 3,737 |       |

  

| Hom   | CUK1  | CUK2  | CUK3  | CUK4  | CUK5  | CUK6  | CUK7  | CUK8  | CUK9  | CUK10 | CUK11 | CUK12 |
|-------|-------|-------|-------|-------|-------|-------|-------|-------|-------|-------|-------|-------|
| CUK1  |       |       |       |       |       |       |       |       |       |       |       |       |
| CUK2  | 3,000 |       |       |       |       |       |       |       |       |       |       |       |
| CUK3  | 1,562 | 2,808 |       |       |       |       |       |       |       |       |       |       |
| CUK4  | 3,227 | 1,896 | 3,220 |       |       |       |       |       |       |       |       |       |
| CUK5  | 3,105 | 2,648 | 3,103 | 2,093 |       |       |       |       |       |       |       |       |
| CUK6  | 4,294 | 2,339 | 4,256 | 1,840 | 2,728 |       |       |       |       |       |       |       |
| CUK7  | 2,899 | 2,240 | 2,758 | 2,293 | 2,294 | 2,630 |       |       |       |       |       |       |
| CUK8  | 3,260 | 2,389 | 3,251 | 2,367 | 2,424 | 2,363 | 2,285 |       |       |       |       |       |
| CUK9  | 2,873 | 2,264 | 2,869 | 2,006 | 2,105 | 2,540 | 2,155 | 2,201 |       |       |       |       |
| CUK10 | 3,175 | 2,289 | 3,033 | 2,102 | 2,885 | 2,577 | 2,333 | 2,125 | 2,403 |       |       |       |
| CUK11 | 2,361 | 2,760 | 2,347 | 2,471 | 1,905 | 2,533 | 2,470 | 1,889 | 2,030 | 2,347 |       |       |
| CUK12 | 3,021 | 2,280 | 3,032 | 2,045 | 1,504 | 2,892 | 2,179 | 2,322 | 1,888 | 2,641 | 2,095 |       |

  

| Het   | CUK1  | CUK2  | CUK3  | CUK4  | CUK5  | CUK6  | CUK7  | CUK8  | CUK9  | CUK10 | CUK11 | CUK12 |
|-------|-------|-------|-------|-------|-------|-------|-------|-------|-------|-------|-------|-------|
| CUK1  |       |       |       |       |       |       |       |       |       |       |       |       |
| CUK2  | 3,329 |       |       |       |       |       |       |       |       |       |       |       |
| CUK3  | 450   | 3,341 |       |       |       |       |       |       |       |       |       |       |
| CUK4  | 2,565 | 2,393 | 2,582 |       |       |       |       |       |       |       |       |       |
| CUK5  | 2,422 | 3,186 | 2,360 | 3,072 |       |       |       |       |       |       |       |       |
| CUK6  | 1,871 | 2,391 | 1,857 | 1,709 | 2,336 |       |       |       |       |       |       |       |
| CUK7  | 2,758 | 2,846 | 2,805 | 2,578 | 2,808 | 2,356 |       |       |       |       |       |       |
| CUK8  | 2,399 | 2,183 | 2,356 | 2,454 | 2,452 | 2,141 | 2,957 |       |       |       |       |       |
| CUK9  | 2,706 | 3,696 | 2,658 | 3,461 | 819   | 2,534 | 3,427 | 2,643 |       |       |       |       |
| CUK10 | 2,516 | 2,091 | 2,498 | 2,359 | 2,127 | 1,869 | 2,569 | 1,553 | 2,589 |       |       |       |
| CUK11 | 2,807 | 2,493 | 2,701 | 2,483 | 1,684 | 2,370 | 2,449 | 2,454 | 1,911 | 2,436 |       |       |
| CUK12 | 2,496 | 3,424 | 2,407 | 3,072 | 920   | 2,322 | 2,589 | 2,666 | 996   | 2,391 | 1,642 |       |

The number of single nucleotide differences between the 12 CUK strains (shown for the entire region over which SNPs could be called; 29.5 Mb of the 32 Mb haploid genome). **SNPs**, the total number of SNPs between strain pairs; **Hom**, the number of homozygous SNPs; **Het**, the number of heterozygous ones.
